# Supplementary material for: Low-grade inflammation in type 2 diabetes: a cross-sectional study from a Danish diabetes outpatient clinic
Source: PubMed Central journal article supplement — BMJ Open. 2022 Dec 14;12(12):e062188. doi: 10.1136/bmjopen-2022-062188 (PMC9756179; doi:10.1136/bmjopen-2022-062188), 2022-12-14
Supplement: bmjopen-2022-062188.draft_revisions.pdf [file bmjopen-2022-062188.draft_revisions.pdf]

# BMJ Open

BMJ Open is committed to open peer review. As part of this commitment we make the peer review history of every article we publish publicly available.

When an article is published we post the peer reviewers' comments and the authors' responses online. We also post the versions of the paper that were used during peer review. These are the versions that the peer review comments apply to.

The versions of the paper that follow are the versions that were submitted during the peer review process. They are not the versions of record or the final published versions. They should not be cited or distributed as the published version of this manuscript.

BMJ Open is an open access journal and the full, final, typeset and author-corrected version of record of the manuscript is available on our site with no access controls, subscription charges or pay-per-view fees (<http://bmjopen.bmj.com>).

If you have any questions on BMJ Open's open peer review process please email [info.bmjopen@bmj.com](mailto:info.bmjopen@bmj.com)

# BMJ Open

## Associations between systemic low-grade inflammation and body weight, therapeutical management, and comorbidities in type 2 diabetes

|                               |                                                                                                                                                                                                                                                                                                                                                                                                                                                                                                                                                                                                                                                                                                                                             |
|-------------------------------|---------------------------------------------------------------------------------------------------------------------------------------------------------------------------------------------------------------------------------------------------------------------------------------------------------------------------------------------------------------------------------------------------------------------------------------------------------------------------------------------------------------------------------------------------------------------------------------------------------------------------------------------------------------------------------------------------------------------------------------------|
| Journal:                      | <i>BMJ Open</i>                                                                                                                                                                                                                                                                                                                                                                                                                                                                                                                                                                                                                                                                                                                             |
| Manuscript ID                 | bmjopen-2022-062188                                                                                                                                                                                                                                                                                                                                                                                                                                                                                                                                                                                                                                                                                                                         |
| Article Type:                 | Original research                                                                                                                                                                                                                                                                                                                                                                                                                                                                                                                                                                                                                                                                                                                           |
| Date Submitted by the Author: | 21-Feb-2022                                                                                                                                                                                                                                                                                                                                                                                                                                                                                                                                                                                                                                                                                                                                 |
| Complete List of Authors:     | Okdahl, Tina; Aalborg University Hospital, Mech-Sense, Department of Gastroenterology and Hepatology<br>Wegeberg, Anne-Marie; Aalborg University Hospital, Mech-Sense, Department of Gastroenterology & Hepatology, ; Aalborg Universitet, Department of Clinical Medicine<br>Pociot, Flemming; Steno Diabetes Center Copenhagen; University of Copenhagen Faculty of Health and Medical Sciences<br>Brock, Birgitte; Steno Diabetes Center Copenhagen<br>Størling, Joachim; Steno Diabetes Center Copenhagen; University of Copenhagen, Department of Biomedical Sciences<br>Brock, Christina; Aalborg University Hospital, Mech-Sense, Department of Gastroenterology and Hepatology; Aalborg University, Department of Clinical Medicine |
| Keywords:                     | DIABETES & ENDOCRINOLOGY, IMMUNOLOGY, Diabetic neuropathy < DIABETES & ENDOCRINOLOGY                                                                                                                                                                                                                                                                                                                                                                                                                                                                                                                                                                                                                                                        |
|                               |                                                                                                                                                                                                                                                                                                                                                                                                                                                                                                                                                                                                                                                                                                                                             |

SCHOLARONE™  
Manuscripts

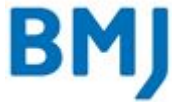

I, the Submitting Author has the right to grant and does grant on behalf of all authors of the Work (as defined in the below author licence), an exclusive licence and/or a non-exclusive licence for contributions from authors who are: i) UK Crown employees; ii) where BMJ has agreed a CC-BY licence shall apply, and/or iii) in accordance with the terms applicable for US Federal Government officers or employees acting as part of their official duties; on a worldwide, perpetual, irrevocable, royalty-free basis to BMJ Publishing Group Ltd ("BMJ") its licensees and where the relevant Journal is co-owned by BMJ to the co-owners of the Journal, to publish the Work in this journal and any other BMJ products and to exploit all rights, as set out in our [licence](#).

The Submitting Author accepts and understands that any supply made under these terms is made by BMJ to the Submitting Author unless you are acting as an employee on behalf of your employer or a postgraduate student of an affiliated institution which is paying any applicable article publishing charge ("APC") for Open Access articles. Where the Submitting Author wishes to make the Work available on an Open Access basis (and intends to pay the relevant APC), the terms of reuse of such Open Access shall be governed by a Creative Commons licence – details of these licences and which [Creative Commons](#) licence will apply to this Work are set out in our licence referred to above.

Other than as permitted in any relevant BMJ Author's Self Archiving Policies, I confirm this Work has not been accepted for publication elsewhere, is not being considered for publication elsewhere and does not duplicate material already published. I confirm all authors consent to publication of this Work and authorise the granting of this licence.

**TITLE PAGE**

**Full Title:** Associations between systemic low-grade inflammation and body weight, therapeutical management, and comorbidities in type 2 diabetes

**Authors:**

Tina Okdahl<sup>1</sup>, Anne-Marie Wegeberg<sup>1,2</sup>, Flemming Pociot<sup>3,4</sup>, Birgitte Brock<sup>3</sup>, Joachim Størling<sup>3,5</sup>, Christina Brock<sup>1,2</sup>

<sup>1</sup>Mech-Sense, Department of Gastroenterology and Hepatology, Aalborg University Hospital, Aalborg, Denmark

<sup>2</sup>Department of Clinical Medicine, Aalborg University, Søndre Skovvej 15, 9000 Aalborg, Denmark

<sup>3</sup>Steno Diabetes Center Copenhagen, Gentofte, Denmark

<sup>4</sup>Faculty of Health and Medical Sciences, University of Copenhagen, Copenhagen, Denmark

<sup>5</sup>Department of Biomedical Sciences, University of Copenhagen, Copenhagen, Denmark

**Corresponding Author:**

Professor Christina Brock, DVM, PhD

Mech-Sense, Department of Gastroenterology and Hepatology, Aalborg University Hospital and Clinical Institute, Aalborg University, Mølleparkvej 4, Aalborg 9000, Denmark

Telephone: +45 9766 0510, e-mail: [christina.brock@rn.dk](mailto:christina.brock@rn.dk)

**Word count:** 3515

**Keywords:** Diabetes, inflammation, comorbidity, cytokine, chemokine

1  
2  
3  
4  
5  
6  
7  
8  
9  
10  
11  
12  
13  
14  
15  
16  
17  
18  
19  
20  
21  
22  
23  
24  
25  
26  
27  
28  
29  
30  
31  
32  
33  
34  
35  
36  
37  
38  
39  
40  
41  
42  
43  
44  
45  
46  
47  
48  
49  
50  
51  
52  
53  
54  
55  
56  
57  
58  
59  
60

## STRUCTURED ABSTRACT

**Objectives:** To investigate low-grade inflammation in type 2 diabetes and explore associations to clinical aspects as well as micro- and macrovascular complications.

**Design:** Cross-sectional analysis

**Setting:** The out-patient diabetes clinic at the department of endocrinology at Aalborg University Hospital, Denmark

**Participants:** 100 participants with type 2 diabetes confirmed by a HbA1C  $\geq$  6.5% for a minimum of one year and 21 healthy controls

**Outcome measures:** Plasma levels of 27 inflammation-related biomarkers measured by immunoassay. Associations with micro-and macrovascular complications, body weight, glyceimic control, medication, and sex were investigated in the diabetes cohort.

**Results:** Plasma levels of TNF- $\alpha$ , eotaxin, MCP-1, MDC, MIP-1 $\beta$ , and CRP were elevated in type 2 diabetes ( $p < 0.05$ ), while IL-7 was decreased ( $p < 0.001$ ). IL-12/IL-23p40, IL-15 and CRP levels were increased with body weight ( $p < 0.05$ ), while IL-12/IL-23p40 and eotaxin were increased with elevated HbA1c levels ( $p < 0.03$ ). DPP-4 inhibitor therapy was associated with lower levels of IL-18, IP-10, and MDC ( $p < 0.03$ ), while females had higher levels of MDC ( $p = 0.012$ ). Individuals with  $\geq 3$  diabetic complications had elevated levels of IL-6, IL-10, IL-12/IL-23p40, IL-15, and CRP compared to those with  $\leq 3$  ( $p < 0.05$ ).

**Conclusion:** The level of low-grade inflammation in type 2 diabetes is associated with obesity, glyceimic regulation, therapeutical management, sex, and complications. Our results underline the importance of addressing inflammatory issues in type 2 diabetes, as these may predispose for crippling comorbidities.

### Strengths and limitations of this study:

- Analysis of a broad palette of inflammatory biomarkers in plasma in 100 participants with type 2 diabetes and 21 healthy controls
- High degree of heterogeneity of our cohort, which allows for generalization to the population of type 2 diabetes
- Well-characterized cohort in regard to micro- and macrovascular comorbidities
- This study is based on secondary analysis and thus inclusion and exclusion criteria were not designed specifically with the investigation of inflammatory biomarkers in mind

## 1 INTRODUCTION

1  
2  
3  
4 Tight glycaemic regulation is vital for balancing the existing energy demand in tissues by combining  
5 resources originating from the nutritional supply and release from internal storages. Low blood glucose is  
6 potentially life-threatening, while long-term elevated levels have several metabolic consequences, including  
7 sorbitol production, mitochondrial dysfunction, and formation of advanced glycation end products (1).  
8  
9 Chronic hyperglycemia can be caused either by insulin deficiency, as seen in type 1 diabetes, or by a  
10 combination of generalized insulin resistance in peripheral tissues and insufficient insulin production  
11 resulting in type 2 diabetes. The latter is the most prevalent diabetes type accounting for up to 90% of the  
12 cases (2).  
13  
14  
15  
16

17  
18 The pathogenesis of type 2 diabetes is highly complex and multifactorial, and many aspects of the disease  
19 require further elucidation. However, it is clear that obesity along with a sedentary lifestyle is a substantial  
20 risk factor for development of insulin resistance and type 2 diabetes through stress-induced inflammation in  
21 adipose tissue leading to insensitivity of the insulin receptor (3). In recent years, the previous view on  
22 adipose tissue as a mere storage of fat has been disproved, and it is now accepted that especially visceral  
23 adipose tissue possesses important endocrine and inflammatory properties. As an example, adipocytes  
24 activated by expansion-associated hypoxia secrete cytokines and so-called adipokines, many of which are  
25 pro-inflammatory in nature (4). As the prevalence of both obesity and type 2 diabetes continue to rise  
26 worldwide (2), a better understanding of the inflammatory link between these lifestyle-associated conditions  
27 is crucial.  
28  
29  
30  
31  
32  
33

34 In addition to obesity-induced inflammation, excess glucose availability in diabetes causes alterations in  
35 normal homeostasis, facilitating the progression of proinflammatory cytokine release to the  
36 microenvironment. Low-grade systemic inflammation is thus regarded as an accompanying condition in type  
37 2 diabetes (5). Increased levels of proinflammatory biomarkers such as interleukin (IL) 6 and C-reactive  
38 protein (CRP) have been shown to be associated with an increased risk of type 2 diabetes development in  
39 several prospective studies (6,7). This suggests that the pathogenetic mechanisms in type 2 diabetes is  
40 influenced by systemic low-grade inflammation. It is, however, unclear whether this proinflammatory state  
41 remains during the course of the disease or if it increases or diminishes over time. In addition, standard  
42 medical treatment in type 2 diabetes such as statins and dipeptidyl peptidase-4 (DPP-4) inhibitors have  
43 immunomodulating properties and may thus influence the inflammatory response (8,9).  
44  
45  
46  
47  
48  
49

50 The low-grade systemic inflammation in type 2 diabetes is clinically essential, because it is associated with  
51 the development and progression of long-term complications such as nephropathy, neuropathy and  
52 retinopathy (10–12). Moreover, low-grade inflammation is associated with cardiovascular disease in diabetes  
53 (13), which is the primary cause of morbidity and mortality in individuals with type 2 diabetes (14).  
54  
55  
56

57 The aim of this study was to investigate the level of low-grade systemic inflammation in a cohort of  
58 individuals with type 2 diabetes with varying disease duration. Furthermore, we aimed to explore if presence  
59  
60

of inflammation was more prevalent in clinically relevant subgroups of the type 2 diabetes cohort, and whether elevated systemic inflammation was associated with number of diabetic comorbidities. We hypothesized that individuals with type 2 diabetes exhibited higher levels of pro-inflammatory biomarkers than healthy controls, and that levels of pro-inflammatory biomarkers were associated with obesity, and glycemic control. Further, we hypothesized that the number of diabetes-related micro- and macrovascular complications and therapeutic management were associated with the level of low-grade systemic inflammation.

## 2 METHODS

### 2.1 Study population

All individuals with type 2 diabetes scheduled for regular health visits at the out-patient diabetes clinic at the department of endocrinology at Aalborg University Hospital, Denmark were informed about the study and screened for eligibility after signing of the informed consent form, and 100 participants were included for cross-sectional analysis. Inclusion criteria included Northern European descent, age above 18 years, a verified diagnosis of type 2 diabetes with HbA1C  $\geq$  6.5% for a minimum of one year, and stable diabetes treatment. People with other endocrinological or neurological diseases were excluded. Prior to study initiation, the protocol was approved by The North Denmark Region Committee on Health Research Ethics, Denmark (N-20170045). The primary outcome of the study was cardiac vagal tone and the results have been published elsewhere (15). The control cohort consisted of sex-matched healthy volunteers (n=21) recruited for a randomized controlled trial (N-20090008) likewise conducted by our research group.

### 2.2 Blood samples

Morning blood samples were drawn from the cubital vein after a fasting period of a minimum of six hours. For analysis of inflammatory biomarkers, blood was collected in EDTA tubes and centrifuged for 10 minutes at 1000 g. Isolated plasma was aliquoted in appropriate volumes and stored in a biobank at  $-80^{\circ}\text{C}$  until the complete data set was collected. All samples were thawed just prior to analysis. Samples from both cohorts were analyzed consecutively to minimize interplate variability. For analysis of hemoglobin A1c (HbA1c), blood was collected in lithium heparin tubes and analyzed by routine biochemical procedures.

### 2.3 Inflammatory biomarkers

Biomarker concentrations in plasma samples were analyzed using the V-PLEX Neuroinflammation Panel 1 Human Kit (Meso Scale Diagnostics® [MSD], Gaithersburg, MD, USA) on a MESO QuickPlex SQ 120 instrument (MSD) according to the manufacturer's specifications. Sample values below the detection limit of the assay were assigned a value of the detection limit divided by  $\sqrt{2}$  (16). If more than 30% of the measured samples for any given biomarker were below the detection limit, the biomarker was excluded from the analysis. Likewise, samples with a coefficient of variation (CV)  $>30\%$  between duplicate measurements were excluded from the analysis (Supplementary Table 1). Biomarkers on the panel included: IL-1 $\alpha$ , IL-1 $\beta$ ,

1  
2  
3  
4 IL-2, IL-4, IL-5, IL-6, IL-7, IL-8, IL-10, IL-12/IL-23p40, IL-13, IL-15, IL-16, IL-17A, interferon (IFN)- $\gamma$ ,  
5 tumor necrosis factor (TNF)- $\alpha$ , TNF- $\beta$ , eotaxin, eotaxin-3, IFN- $\gamma$ -induced protein (IP)-10, monocyte  
6 chemoattractant protein (MCP)-1, MCP-4, macrophage-derived chemokine (MDC), macrophage  
7 inflammatory protein (MIP)-1 $\alpha$ , MIP-1 $\beta$ , thymus and activation regulated chemokine (TARC), CRP.  
8  
9  
10

#### 11 **2.4 Assessment of diabetic comorbidities**

12 All participants in the type 2 diabetes cohort underwent investigations concerning common diabetic  
13 comorbidities: 1) *Peripheral neuropathy*: Signs of peripheral neuropathy was investigated by vibration  
14 perception threshold (VPT) at the dorsum of the first phalanx using a biothesiometer (Bio-Medical  
15 Instruments). The measurement was done three consecutive times bilaterally, and the final vibration  
16 perception threshold was calculated as the mean value of both feet. Results above 18 volts were considered  
17 abnormal and thus as signs of diabetic peripheral neuropathy. 2) *Nephropathy*: Morning urine samples were  
18 collected by participants at home and handed over to study personnel for standard biochemical analysis.  
19 Diabetic nephropathy was defined as a urine albumin/creatinine ratio above 30 mg/g, which is a standard cut-  
20 off for early diabetic nephropathy and microalbuminuria. 3) *Retinopathy*: Participants were asked if they had  
21 ever been diagnosed with proliferative or non-proliferative retinopathy 4) *Cardiac autonomic neuropathy*:  
22 Electrocardiographic recordings by the VAGUS™ device (Medicus Engineering Aps, Aarhus, Denmark)  
23 were applied for evaluation of cardiac autonomic neuropathy. Recordings were made during rest, postural  
24 change, deep breathing, and the Valsalva maneuver. Abnormal results in one or more exercises were  
25 considered as signs of cardiac autonomic neuropathy.  
26  
27  
28  
29  
30  
31  
32  
33  
34  
35

#### 36 **2.5 Data handling and statistics**

37 Distribution of raw and log-transformed data was evaluated by Shapiro-Wilk test of normality. Pairwise  
38 comparisons among groups were achieved by independent samples t-test or Mann-Whitney U based on data  
39 distribution. For volcano plots, the fold difference was calculated as the log<sub>2</sub>-ratio between two group means.  
40 Multiple regression analyses were performed to investigate the association between clinical parameters and  
41 inflammatory biomarkers. The independent variables included obesity (BMI<30 versus BMI>30), blood  
42 glucose level (HbA1c<55 versus HbA1c>55), DPP-4 inhibitor therapy, GLP-1 receptor agonist therapy, and  
43 sex. Additionally, two models were applied in which associations were adjusted for the remaining clinical  
44 variables, and total plasma cholesterol or statin therapy. An  $\alpha$ -level of 0.05 was applied for all analyses. The  
45 STATA software (StataCorp LLC, version 15.1) was applied for all statistical analyses.  
46  
47  
48  
49  
50  
51

#### 52 **2.6 Patient and public involvement**

53 Patients or members of the public were not included in the design, conduction, reporting, or dissemination  
54 plans of this project.  
55  
56

### 57 **3 RESULTS**



### 3.1 Study population

Two subjects in the type 2 diabetes group were excluded due to hemolysis of collected blood samples. Individuals in the diabetes group were older, had higher BMI, and higher HbA1c compared to the healthy controls ( $p < 0.001$ ). On the contrary, healthy controls had higher total cholesterol ( $p < 0.001$ ), high-density lipoprotein (HDL) ( $p = 0.006$ ), and low-density lipoprotein (LDL) ( $p < 0.001$ ) compared to individuals in the type 2 diabetes cohort of which 66% were on lipid-lowering statin therapy. A full demographic overview can be found in Table 1.

|                            | Healthy<br>(n=21) | Type 2 diabetes<br>(n=98) | p-value          |
|----------------------------|-------------------|---------------------------|------------------|
| <b>Basic demography</b>    |                   |                           |                  |
| Age (years)                | 51 ± 6            | 65 (56-71)                | <b>&lt;0.001</b> |
| Sex (% of males)           | 71                | 63                        | 0.478            |
| BMI (kg/m <sup>2</sup> )   | 25.6 (23.7-28.0)  | 31.4 ± 5.6                | <b>&lt;0.001</b> |
| Current smokers (%)        | 19                | 5                         | <b>0.028</b>     |
| Disease duration (y)       | -                 | 10 (5-17)                 | -                |
| <b>Vital signs</b>         |                   |                           |                  |
| Systolic BP (mmHg)         | 129 ± 15          | 137 (128-147)             | <b>0.021</b>     |
| Diastolic BP (mmHg)        | 76 ± 11           | 77 ± 9                    | 0.720            |
| Pulse (beats/min)          | 66 ± 7            | 69.8 ± 10                 | 0.110            |
| <b>Biochemistry</b>        |                   |                           |                  |
| HbA1c                      |                   |                           |                  |
| (mmol/mol)                 | 33 (33-37)        | 55 (48-61.5)              | <b>&lt;0.001</b> |
| (%)                        | 5.2 (5.2-5.5)     | 7.2 (6.5-7.8)             | <b>&lt;0.001</b> |
| Cholesterol (mmol/l)       | 5.4 ± 0.9         | 3.9 ± 0.9                 | <b>&lt;0.001</b> |
| HDL (mmol/l)               | 1.6 ± 0.4         | 1.2 (1.0-1.5)             | <b>0.006</b>     |
| LDL (mmol/l)               | 3.3 ± 0.9         | 1.9 ± 0.7                 | <b>&lt;0.001</b> |
| Triglycerides (mmol/l)     | 1.2 ± 0.5         | 1.4 (1.0-2.0)             | <b>0.023</b>     |
| <b>Medication</b>          |                   |                           |                  |
| DPP-4 inhibitor (%)        | -                 | 18                        | -                |
| SGLT-2 inhibitor (%)       | -                 | 23                        | -                |
| GLP-1 receptor agonist (%) | -                 | 23                        | -                |
| Statins (%)                | -                 | 66                        | -                |

**Table 1:** Demographic and clinical characteristics among groups. Results displayed as either mean ± SD or median (1<sup>st</sup>-3<sup>rd</sup> quartiles) based on distribution of the data. Boldface font indicates statistical significance

( $p < 0.05$ ). BMI: Body mass index; HDL: High-density lipoprotein; LDL: Low-density lipoprotein; DPP-4: Dipeptidyl peptidase-4; SGLT: Sodium-glucose transport protein; GLP: Glucagon-like peptide.

### 3.2 Inflammatory biomarkers in plasma

Plasma levels of 27 inflammatory biomarkers were measured in individuals with type 2 diabetes and healthy controls. Eleven biomarkers were excluded from the statistical analyses due to being undetectable or of insufficient measurement quality due to low levels (Supplementary Table 1). The remaining 16 biomarkers (IL-6, IL-7, IL-8, IL-10, IL-12/IL-23p40, IL-15, IL-16, IFN- $\gamma$ , TNF- $\alpha$ , eotaxin, IP-10, MCP-1, MDC, MIP-1 $\beta$ , TARC, CRP) were measured in  $\geq 95\%$  of the samples. The concentrations of TNF- $\alpha$  ( $p = 0.003$ ) and CRP ( $p = 0.030$ ) were significantly higher in the type 2 diabetes cohort compared to the control cohort (Figure 1). Similarly, 4 chemokines (eotaxin ( $p = 0.001$ ), MCP-1 ( $p = 0.018$ ), MDC ( $p = 0.005$ ), and MIP-1 $\beta$  ( $p = 0.047$ )) showed elevated levels in the diabetes cohort. In contrast, the level of cytokine IL-7 was significantly lower in participants with type 2 diabetes compared to healthy controls ( $p < 0.001$ ). Plasma concentrations of all measured biomarkers are presented in supplementary Table 2. When subdividing the type 2 diabetes cohort according to disease duration only IL-10 was significantly different ( $p = 0.008$ ) between groups with a modestly increased level found in subjects with disease duration above ten years (Table 2).

|                       | Short-term disease duration | Long-term disease duration | p-value      |
|-----------------------|-----------------------------|----------------------------|--------------|
| <b>IL-6</b>           | 0.8 (0.6-1.1)               | 0.9 (0.6-1.4)              | 0.480        |
| <b>IL-7</b>           | 7.6 (5.7-10.1)              | 8.3 (6.4-10.7)             | 0.442        |
| <b>IL-8</b>           | 12.5 (9.2-16.8)             | 13.1 (9.4-16.5)            | 0.970        |
| <b>IL-10</b>          | 0.3 (0.2-0.3)               | 0.3 (0.2-0.4)              | <b>0.008</b> |
| <b>IL-12/IL-23p40</b> | 107.5 (80.3-142.6)          | 104.9 (83.0-155.3)         | 0.740        |
| <b>IL-15</b>          | 2.6 (2.2-2.8)               | 2.8 (2.4-3.0)              | 0.170        |
| <b>IL-16</b>          | 208.7 ± 51.8                | 206.6 ± 46.9               | 0.835        |
| <b>IFN-γ</b>          | 4.7 (3.0-7.7)               | 5.4 (3.7-7.8)              | 0.313        |
| <b>TNF-α</b>          | 1.5 ± 0.4                   | 1.6 ± 0.5                  | 0.246        |
| <b>Eotaxin</b>        | 326.7 (264.4-447.5)         | 350.6 (258.2-418.9)        | 0.860        |
| <b>IP-10</b>          | 590.7 (436.2-689.7)         | 608.2 ± 213.3              | 0.950        |
| <b>MCP-1</b>          | 327.9 ± 104.3               | 317.8 (229.3-379.6)        | 0.604        |
| <b>MDC</b>            | 1136.4 ± 375.1              | 1013.8 (881.6-1241.6)      | 0.513        |
| <b>MIP-1β</b>         | 162.0 ± 44.3                | 162.1 ± 53.3               | 0.992        |
| <b>TARC</b>           | 287.3 (168.1-404.2)         | 267.7 (169.3-398.6)        | 0.763        |
| <b>CRP (ng/mL)</b>    | 2941.6 (1050.8-5236.5)      | 2025 (966.1-4686.6)        | 0.587        |

**Table 2:** Plasma concentrations of inflammatory factors in type 2 diabetes with short-term disease duration (<10 years, n=44) and long-term disease duration (>10 years, n=50). Results (in pg/mL, unless otherwise stated) displayed as either mean ± SD or median (1<sup>st</sup>-3<sup>rd</sup> quartiles) based on distribution of the data. Boldface font indicates statistical significance (p<0.05).

### 3.3 Inflammatory biomarkers in subgroups

Obesity significantly predicted concentration of five inflammatory biomarkers (IL-12/IL-23p40, IL-15, IFN-γ, MDC, and CRP) (Table 3). When adjusting for HbA1c, sex, and total plasma cholesterol or statin use, IL-12/IL-23p40, IL-15, and CRP remained statistically significant predicted by obesity. HbA1c significantly predicted eotaxin and IL-12/IL-23p40 levels after adjusting for confounders. Lower levels of IL-8, IP-10, and MDC were predicted by DPP-4 inhibitor therapy, while higher levels of TNF-α were predicted by GLP-1 receptor agonist therapy. Lastly, levels of MDC were predicted by sex with lower levels found in male subjects compared to females.

|                                          | UNADJUSTED MODEL |                          |                  | ADJUSTED MODEL 1 |                          |                  | ADJUSTED MODEL 2 |                          |                  |
|------------------------------------------|------------------|--------------------------|------------------|------------------|--------------------------|------------------|------------------|--------------------------|------------------|
|                                          | R <sup>2</sup>   | Effect size              | p-value          | R <sup>2</sup>   | Effect size              | p-value          | R <sup>2</sup>   | Effect size              | p-value          |
| <b>A. Obesity</b>                        |                  |                          |                  |                  |                          |                  |                  |                          |                  |
| IL-12/IL-23p40                           | 0.11             | 45.8 (19.1 - 72.6)       | <b>0.001</b>     | 0.32             | 44.9 (6.2 - 70.6)        | <b>&lt;0.001</b> | 0.27             | 41.5 (21.2 - 63.1)       | <b>0.001</b>     |
| IL-15                                    | 0.04             | 0.2 (0.0 - 0.5)          | <b>0.038</b>     | 0.44             | 0.2 (0.0 - 0.5)          | 0.086            | 0.26             | 0.2 (0.0 - 0.5)          | <b>0.045</b>     |
| IFN- $\gamma$                            | 0.05             | 3.6 (0.5 - 6.7)          | <b>0.024</b>     | 0.38             | 2.8 (-0.3 - 7.0)         | 0.096            | 0.22             | 3.3 (-0.2 - 7.3)         | 0.111            |
| MDC                                      | 0.06             | 190.6 (35.4 - 345.9)     | <b>0.017</b>     | 0.43             | 104.5 (38.6 - 299.4)     | 0.131            | 0.28             | 141.7 (-59.4 - 314.4)    | 0.119            |
| CRP                                      | 0.14             | 2896.5 (1412.0 - 4380.9) | <b>&lt;0.001</b> | 0.50             | 2223.5 (875.9 - 4034.3)  | <b>0.012</b>     | 0.42             | 3081.9 (1161.3 - 4640.9) | <b>&lt;0.001</b> |
| <b>B. Blood glucose</b>                  |                  |                          |                  |                  |                          |                  |                  |                          |                  |
| IL-8                                     | 0.04             | 2.9 (0.1 - 5.7)          | <b>0.043</b>     | 0.50             | 1.9 (-1.1 - 5.3)         | 0.352            | 0.26             | 2.5 (0.3 - 4.7)          | 0.062            |
| IL-12/IL-23p40                           | 0.03             | 26.1 (-1.3 - 53.4)       | 0.062            | 0.47             | 25.9 (4.2 - 50.9)        | 0.168            | 0.40             | 29.2 (5.1 - 52.7)        | <b>0.014</b>     |
| TNF- $\alpha$                            | 0.06             | 0.2 (0.0 - 0.4)          | <b>0.020</b>     | 0.32             | 0.1 (-0.0 - 0.3)         | 0.158            | 0.21             | 0.2 (0.0 - 0.4)          | 0.067            |
| Eotaxin                                  | 0.05             | 58.9 (8.7 - 109.1)       | <b>0.022</b>     | 0.46             | 66.3 (35.7 - 108.7)      | <b>0.001</b>     | <b>0.22</b>      | 54.8 (-0.1 - 98.1)       | <b>0.028</b>     |
| <b>C. DPP-4 inhibitor therapy</b>        |                  |                          |                  |                  |                          |                  |                  |                          |                  |
| IL-8                                     | 0.05             | -4.0 (-7.5 - -0.5)       | <b>0.028</b>     | 0.62             | -2.8 (-23.5 - 5.7)       | 0.683            | 0.32             | -3.8 (-7.5 - -1.2)       | <b>0.023</b>     |
| IP-10                                    | 0.08             | -175.9 (-303.7 - -48.2)  | <b>0.007</b>     | 0.58             | -272.1 (-655.4 - -146.2) | 0.334            | 0.45             | -201.5 (-298.6 - -87.1)  | <b>0.001</b>     |
| MDC                                      | 0.06             | -236.8 (-433.1 - -40.4)  | <b>0.019</b>     | 0.65             | -258.5 (-484.1 - -138.2) | <b>0.003</b>     | 0.50             | -256.6 (-487.1 - -154.9) | <b>0.003</b>     |
| TARC                                     | 0.11             | 165.7 (69.3 - 262.0)     | <b>0.001</b>     | 0.76             | 98.9 (-102.5 - 220.6)    | 0.350            | 0.48             | 103.3 (9.6 - 257.9)      | 0.102            |
| <b>D. GLP-1 receptor agonist therapy</b> |                  |                          |                  |                  |                          |                  |                  |                          |                  |
| IL-8                                     | 0.05             | 3.8 (0.5 - 7.1)          | <b>0.023</b>     | 0.60             | 0.6 (-3.4 - 5.1)         | 0.765            | 0.33             | 1.0 (-1.8 - 5.0)         | 0.623            |
| IL-16                                    | 0.04             | -23.5 (-46.5 - -0.6)     | <b>0.044</b>     | 0.04             | -22.7 (-48.0 - 2.5)      | 0.077            | 0.04             | -24.0 (-49.3 - 1.4)      | 0.064            |
| TNF- $\alpha$                            | 0.11             | 0.4 (0.2 - 0.6)          | <b>0.001</b>     | 0.16             | 0.3 (0.0 - 0.5)          | <b>0.032</b>     | 0.16             | 0.3 (0.0 - 0.5)          | <b>0.025</b>     |

---

|               |     |                         |              |      |                         |              |      |                         |       |
|---------------|-----|-------------------------|--------------|------|-------------------------|--------------|------|-------------------------|-------|
| <b>E. Sex</b> |     |                         |              |      |                         |              |      |                         |       |
| MDC           | 0.1 | -238.5 (-395.1 - -81.9) | <b>0.003</b> | 0.57 | -336.2 (-545.1 - -72.0) | <b>0.012</b> | 0.46 | -257.6 (-4.62.4 - 0.20) | 0.451 |

---

**Table 3:** Multiple regression analysis of plasma concentrations (dependent variable) between A) type 2 diabetes+BMI<30 (n=40) and Type 2 diabetes+BMI>30 (n=58), B) type 2 diabetes with HbA1c<55(n=47) and type 2 diabetes with HbA1c>55 (n=51), C) type 2 diabetes (n=80) and type 2 diabetes treated with DPP-4 inhibitors (n=18), D) type 2 diabetes (n=75) and type 2 diabetes treated with GLP-1 receptor agonists (n=23), and D) male type 2 diabetes (n=62) and female type 2 diabetes (n=36) with overall R-squared value and effect size (95% CI) of BMI, HbA1c, DPP-4 inhibitor therapy, GLP-1 receptor agonist therapy, or sex displayed. Total plasma cholesterol, BMI, HbA1c, and sex were included in the adjusted model 1 as appropriate, while statin use, BMI, HbA1c, and sex were included in the adjusted model 2 as appropriate. Only analytes with significant results are shown. Boldface font indicated statistical significance (p<0.05)

### 3.4 Diabetic comorbidities

When subdividing the type 2 diabetes cohort into groups according to number of diabetic comorbidities, five biomarkers (IL-6, IL-10, IL12/IL-23p40, IL-15, and CRP) were significantly elevated in participants with three or more comorbidities compared to those with fewer or none (Figure 2).

## 4 DISCUSSION

In this study, we investigated the level of systemic low-grade inflammation in a cohort of individuals diagnosed with type 2 diabetes. Elevated levels of several inflammatory biomarkers were found in comparison to healthy controls, evident in both short- and long-term disease duration. Moreover, in the type 2 diabetes cohort, obesity, hyperglycemia and female sex were found to be predictors of elevated levels of various inflammatory biomarkers. Lastly, we were able to establish a connection between the number of common diabetic comorbidities and elevated levels of inflammatory biomarkers including CRP.

### 4.1 Inflammatory biomarkers in plasma

Increased levels of TNF- $\alpha$  and CRP have previously been reported in adults with type 2 diabetes (13,17). CRP production is induced by the presence of both TNF- $\alpha$  and IL-6 (18). Our data support these findings, as we showed concurrent increases in both TNF- $\alpha$  and CRP in the type 2 diabetes cohort regardless of disease duration in comparison to healthy controls.

Eotaxin has been linked to the development of atherosclerosis by facilitating monocyte infiltration in smooth muscle cells under the influence of proinflammatory mediators (19), and elevated levels of this chemokine have previously been reported in type 1 diabetes individuals with complications compared to individuals with no diabetic complications as well as healthy controls (20). Accordingly, our statistical analysis revealed significant increases in several chemokines (eotaxin, MCP-1, MDC, and MIP-1 $\beta$ ) in individuals with type 2 diabetes.

The majority of research regarding IL-7 has been conducted in type 1 diabetes, where elevated levels are shown compared to healthy (21). IL-7 is highly involved in T cell function and proliferation, and a role of this cytokine in mediating expansion of insulin-producing  $\beta$ -cell-autoreactive T cells have been proposed thus implicating IL-7 in the pathogenesis of type 1 diabetes (22). The decreased levels in type 2 diabetes compared to healthy controls found in this study were somewhat surprising but may reflect the lack of T-cell activation the pathology of type 2 diabetes.

IL-10 is generally regarded as an anti-inflammatory cytokine with the ability to dampen the immune response, and previous data have shown downregulation of IL-10 in both type 2 diabetes and obesity *per se* (23). This contrasts our findings, which showed no differences in the overall diabetes cohort but an increase in individuals with long disease duration. This observation could reflect manifestations of compensatory mechanisms toward a long-term elevated inflammatory environment attempting to elicit an anti-

1  
2  
3  
4 inflammatory response. However, pro-inflammatory factors (e.g. TNF- $\alpha$ ) were elevated regardless of disease  
5 duration suggesting that any attempt of balancing the immune response remain challenging in the presence of  
6 type 2 diabetes.  
7  
8

#### 9 **4.2 Inflammatory biomarkers in subgroups**

10  
11 In our type 2 diabetes cohort, obesity (BMI>30) significantly predicted the levels of IL-12/IL-23p40 and  
12 CRP, while eotaxin level was predicted by glycemic regulation (HbA1c). In the unadjusted model, TNF- $\alpha$   
13 was likewise predicted by HbA1c. This association was, however, abolished when the model was adjusted  
14 for confounders. Previously it has been shown that TNF- $\alpha$  release is upregulated in connection with obesity  
15 and has been linked to the progression of insulin resistance (24,25). The fact that TNF- $\alpha$  was not predicted  
16 by obesity in our cohort is thus surprising. However, elevated levels of TNF- $\alpha$  in adipose tissue, but not in  
17 plasma have previously been reported (26), which could also be the case in our cohort. In animal models,  
18 TNF- $\alpha$  antagonist treatment improves insulin resistance in obesity (27). A clinical study, however, failed to  
19 show the same effect in humans (28). Regarding eotaxin, this chemokine has been linked to the development  
20 of cardiovascular disease, which is likewise a complication to long-term hyperglycemia, and our findings of  
21 increased levels in dysregulated individuals could therefore be a plausible sign of atherosclerosis (19).  
22  
23  
24  
25  
26  
27  
28  
29

30 Lower levels of three chemokines (IL-8, IP-10 and MDC) were all predicted by DPP-4 inhibitor therapy.  
31 DPP-4 inhibitor therapy is known to improve glycemic control via prevention of breakdown of the incretin  
32 hormone GLP-1. In addition, several cytokines and chemokines are also substrates of the DPP-4 enzyme,  
33 and DPP-4 inhibitor therapy thus possesses immunomodulating properties possibly facilitating low-grade  
34 systemic inflammation in diabetes (9). Potentially this could explain why promising *in vitro* anti-  
35 inflammatory actions of DPP-4 inhibitors have failed to show convincingly results in humans (29).  
36 Surprisingly, we found lower levels of three DPP-4 substrates (IL-8, IP-10, and MDC) in connection with  
37 DPP-4 inhibitor therapy. Though seemingly in contrast with the expected result, similar observations have  
38 previously been reported (30), underlining the need for further research in the immunomodulating effects of  
39 DPP-4 inhibitor therapy.  
40  
41  
42  
43  
44  
45  
46  
47

48 GLP-1 receptor agonist therapy, which share the same pharmacodynamic endpoint as DPP-4 inhibitor  
49 therapy, is known to possess anti-inflammatory properties independent of improved glycemic control (31).  
50 However, our results showed an approximately 25% increase in proinflammatory TNF- $\alpha$  levels in connection  
51 with GLP-1 receptor agonist therapy. This finding is unexpected and in contrast with a previous pilot study  
52 showing that liraglutide significantly decreased TNF- $\alpha$  levels in a type 2 diabetes cohort (32). Preclinical  
53 studies have likewise shown inhibitory effects of liraglutide on TNF- $\alpha$  expression (33). Other preclinical  
54 studies, however, have reported decreased proinflammatory effects of TNF- $\alpha$  through inhibition of the NK-  
55  
56  
57  
58  
59  
60

κB pathway after GLP-1 receptor agonist therapy (34). If this is the case, this would neutralize the proinflammatory pathways caused by increased TNF-α levels seen in this study.

We showed that the level of the chemokine MDC was predicted by sex with higher levels seen in females compared to males. Different obesity-related inflammatory pathways between men and women with metabolic syndrome have previously been shown. Increased levels of pro-inflammatory mediators seem to facilitate low-grade systemic inflammation in males, while an insufficient anti-inflammatory milieu appears to be dominant in females (35). These findings suggest that any inflammation-modulating therapy in obesity should be differentiated according to sex and underlying mechanisms. In our type 2 diabetes cohort, however, this pattern was not recreated, indicating that the crucial factor may be aspects related to the metabolic syndrome rather than hyperglycemia.

Apart from obesity, hyperglycemia, and sex, other factors such as current smoking status and specific medical therapy may likewise influence the level of inflammation in type 2 diabetes (36,37). In our cohort only 5% were smokers, which is surprisingly low, giving the fact that smoking is a substantial risk factor for development of type 2 diabetes (36). The result may reflect successful free smoking cessation programs, as 40% of our participants reported to be previous smokers. The degree of a persistent pro-inflammatory effect of nicotine following smoking cessation is debated (38), but could potentially be influencing the results in the current study. Moreover, the high proportion of previous smokers could indicate that our cohort consisted of individuals with a high degree of determination and self-efficacy. Such selection bias is potentially also reflected in the median HbA1c of 55 mmol/mol, which is lower in comparison to other cohorts (13,39).

In our cohort, 66% received lipid-lowering statin therapy, which is known to possess anti-inflammatory properties (8), which again could impact the level of investigated inflammatory biomarkers. Consequently, the reported elevated levels of several biomarkers compared to the healthy control cohort could be artificially low due to the anti-inflammatory effect of statins. Potentially this could explain why no pro-inflammatory biomarkers were increased in individuals with longer disease duration as these individuals were more likely to be on statin therapy.

### 4.3 Diabetic comorbidities

It has previously been established that low-grade systemic inflammation plays a role in progression of diabetic complications (10–12). We support those findings by showing that IL-6, IL-10, IL-12/IL-23p40, IL-15, and CRP were elevated in individuals with multiple diabetic comorbidities compared to those with fewer or none. In the literature, IL-6 elevation has in particular been associated with diabetic complications (40–43). Likewise, increased levels of CRP has previously been linked to development and severity of diabetic complications (41,44). In addition, the observed elevated levels of IL-10 were primarily found in subjects with longer disease duration, which could reflect that diabetes comorbidities typically become more



1  
2  
3  
4 prevalent with increasing exposure to glycemc fluctuations and disease duration (45). Furthermore, IL-12  
5 has previously been shown to be involved in the pathogenesis of several diabetic micro- and macrovascular  
6 comorbidities (46). Interestingly, a study in obese and insulin resistant IL-12 knockout mice showed that IL-  
7 12 disruption increased angiogenesis and restored peripheral blood flow perfusion through attenuation of  
8 oxidative stress and increased levels of angiogenic factors (47). In humans, a monoclonal antibody  
9 (Ustekinumab) targeting IL-12/IL-23p40 is currently used as a safe and effective treatment of psoriasis (48).  
10 Our data raise the intriguing possibility of applying this drug as a novel treatment option for diabetic micro-  
11 and macrovascular complications but needs to be investigated in future randomized controlled trials. Finally,  
12 circulating levels of IL-15 have been shown to be influenced by fat mass and physical activity (49).  
13 Furthermore, IL-15 improve lipid deposition and insulin sensitivity by activation of the GLUT-4 transporter  
14 in skeletal muscles. Hence, IL-15 has been proposed as a novel therapeutic option for treating obesity and  
15 type 2 diabetes (50). The increased levels of IL-15 in individuals with three or more comorbidities found in  
16 this study seem to contradict the beneficial effects normally attributed to this cytokine, and confirmation in  
17 additional studies are encouraged.  
18  
19  
20  
21  
22  
23  
24  
25

#### 26 27 **4.4 Strengths and limitations**

28 The strength of this study is the high degree of heterogeneity of our cohort, obtained by systematically  
29 screening all people in our out-patient diabetes clinic, thereby facilitating generalization to the larger  
30 population of type 2 diabetes. However, selection bias in which individuals with low symptom burdens are  
31 more likely to participate cannot be ruled out. Contrary, a majority of patients with complications, who  
32 regard participation in a clinical trial as a possibility to receive extra attention from health care professionals,  
33 is likewise conceivable. It should also be noted that because this study is based on secondary analyses, the  
34 inclusion and exclusion criteria were not designed to exclude participants with comorbidities or medication  
35 use, which could impact the levels of the investigated inflammatory factors. Lastly, registration of  
36 retinopathy was restricted to participant recollection and reporting. Objective measures or consultation in  
37 patient records would have improved the validity of this outcome.  
38  
39  
40  
41  
42  
43  
44

#### 45 **4.5 Conclusion**

46 We showed that individuals with type 2 diabetes exhibit higher degrees of various inflammatory factors in  
47 plasma, and that obesity and glycemc dysregulation are associated with the level of specific inflammatory  
48 factors. Furthermore, a considerable increase in several inflammatory factors was seen in people with  
49 multiple diabetic comorbidities. Regarding medication, DPP-4 inhibitor therapy was associated with  
50 decreased levels of several chemokines, while increased TNF- $\alpha$  levels were observed in association with  
51 GLP-1 receptor agonist therapy. Taken together, our results show that individuals with type 2 diabetes have  
52 systemic low-grade inflammation. Although the cross-sectional nature of our study hinders the ability to look  
53 at the causality between systemic low-grade inflammation and diabetic complications, it is intriguing to  
54  
55  
56  
57  
58  
59  
60

1  
2  
3  
4 speculate whether dampening of the inflammatory state could protect against development of comorbidities  
5 in type 2 diabetes.  
6  
7  
8  
9

## 10 **ACKNOWLEDGEMENTS**

11 We are grateful to Lene Holm Fruensgaard Pedersen for assistance in blood sample collection, and to Nina  
12 Wittorff Jensen, Rebekka Hanne Gerwig and Charlotte Gade Farcinsen Leth for expert technical assistance.  
13  
14  
15

## 16 **AUTHOR CONTRIBUTIONS**

17 Study design and original idea by CB and BB. ALW collected the data. TO, ALW, FP, BB, JS, and CB  
18 analysed and interpreted the data. TO wrote the first draft, but all authors contributed to the final manuscript.  
19 CB are the guarantor of the work, has full access to the data in the study and takes responsibility for the  
20 integrity of the data and the accuracy of the data analysis. The data that support the findings of this study are  
21 available from the corresponding author upon reasonable request.  
22  
23  
24  
25  
26  
27  
28

## 29 **COMPETING INTERESTS**

30 None  
31  
32  
33

## 34 **FUNDING**

35 CB received funding from the Talent Management Program, Aalborg University. AMW received funding  
36 from The Research Foundation of Health Science, Region of Northern Jutland. No funding source had any  
37 role in study design, data collection, data analysis, data interpretation, or the preparation of this article.  
38  
39  
40  
41  
42

## 43 **DATA SHARING STATEMENT**

44 Deidentified participant data are available upon reasonable request from the corresponding author.  
45  
46  
47

## 48 **ETHICS APPROVAL**

49 The protocol was approved by The North Denmark Region Committee on Health Research Ethics, Denmark  
50 (N-20170045)  
51  
52  
53  
54  
55  
56  
57  
58  
59  
60

**REFERENCES**

1. Ighodaro OM. Molecular pathways associated with oxidative stress in diabetes mellitus. Vol. 108, *Biomedicine and Pharmacotherapy*. Elsevier Masson SAS; 2018. p. 656–62.
2. Federation ID. IDF Diabetes Atlas, 9th edn. Brussels [Internet]. 2019. Available from: <https://www.diabetesatlas.org>
3. Prasad M, Chen EW, Toh SA, et al. Autoimmune responses and inflammation in type 2 diabetes. Vol. 107, *Journal of Leukocyte Biology*. John Wiley and Sons Inc; 2020. p. 739–48.
4. Gonzalez AC de O, Costa TF, Andrade Z de A, et al. Wound healing - A literature review. *An Bras Dermatol*. 2016 Oct;91(5):614–20.
5. Gonzalez LL, Garrie K, Turner MD. Type 2 diabetes – An autoinflammatory disease driven by metabolic stress. Vol. 1864, *Biochimica et Biophysica Acta - Molecular Basis of Disease*. Elsevier B.V.; 2018. p. 3805–23.
6. Pradhan AD, Manson JE, Rifai N, et al. C-reactive protein, interleukin 6, and risk of developing type 2 diabetes mellitus. *J Am Med Assoc*. 2001 Jul 18;286(3):327–34.
7. Thorand B, Löwel H, Schneider A, et al. C-reactive protein as a predictor for incident diabetes mellitus among middle-aged men: Results from the MONICA Augsburg Cohort Study, 1984-1998. *Arch Intern Med*. 2003 Jan 13;163(1):93–9.
8. Albert MA, Danielson E, Rifai N, et al. Effect of statin therapy on C-reactive protein levels: The pravastatin inflammation/CRP evaluation (PRINCE): A randomized trial and cohort study. *J Am Med Assoc*. 2001 Jul 4;286(1):64–70.
9. Shao S, Xu QQ, Yu X, et al. Dipeptidyl peptidase 4 inhibitors and their potential immune modulatory functions. *Pharmacol Ther*. 2020 May 1;209:107503.
10. Shao B-Y, Zhang S-F, Li H-D, et al. Epigenetics and Inflammation in Diabetic Nephropathy. *Front Physiol*. 2021 May 5;12.
11. Pop-Busui R, Boulton AJM, Feldman EL, et al. Diabetic Neuropathy: A Position Statement by the American Diabetes Association. *Diabetes Care*. 2017 Jan 20;40(1):136–54.
12. Nebbioso M, Lambiase A, Armentano M, et al. Diabetic retinopathy, oxidative stress, and sirtuins: an in depth look in enzymatic patterns and new therapeutic horizons. *Survey of Ophthalmology*. Elsevier Inc.; 2021.
13. Alexandraki KI, Piperi C, Ziakas PD, et al. Cytokine secretion in long-standing diabetes mellitus type

- 1  
2  
3  
4 1 and 2: Associations with low-grade systemic inflammation. *J Clin Immunol*. 2008 Jul;28(4):314–  
5 21.  
6  
7  
8 14. Maser RE, Mitchell BD, Vinik AI, et al. The Association Between Cardiovascular Autonomic  
9 Neuropathy and Mortality in Individuals With Diabetes: A meta-analysis. *Diabetes Care*. 2003 Jun  
10 1;26(6):1895–901.  
11  
12  
13 15. Wegeberg AM, Lunde ED, Riahi S, et al. Cardiac vagal tone as a novel screening tool to recognize  
14 asymptomatic cardiovascular autonomic neuropathy: Aspects of utility in type 1 diabetes. *Diabetes*  
15 *Res Clin Pract*. 2020 Dec 1;170.  
16  
17  
18 16. Croghan CW, Egeghy PP. Methods of Dealing With Values Below the Limit of Detection Using Sas.  
19 *South SAS User Gr*. 2003;5.  
20  
21  
22 17. Malik A, Morya RK, Saha S, et al. Oxidative stress and inflammatory markers in type 2 diabetic  
23 patients. *Eur J Clin Invest*. 2020 Jun 1;50(6).  
24  
25  
26 18. Vachharajani V, Granger DN. Adipose tissue: A motor for the inflammation associated with obesity.  
27 Vol. 61, *IUBMB Life*. John Wiley & Sons, Ltd; 2009. p. 424–30.  
28  
29  
30 19. Wang Y, Luk AOY, Ma RCW, et al. Independent predictive roles of eotaxin Ala23Thr, paraoxonase  
31 2 Ser311Cys and  $\beta$ 3-adrenergic receptor Trp64Arg polymorphisms on cardiac disease in Type 2  
32 Diabetes - An 8-year prospective cohort analysis of 1297 patients. *Diabet Med*. 2010;27(4):376–83.  
33  
34  
35 20. Jamali Z, Nazari M, Khoramdelazad H, et al. Expression of CC chemokines CCL2, CCL5, and  
36 CCL11 is associated with duration of disease and complications in type-1 diabetes: A study on  
37 Iranian diabetic patients. *Clin Lab*. 2013;59(9–10):993–1001.  
38  
39  
40 21. Coulson DJ, Bakhshab S, Latief JS, et al. MiR-126, IL-7, CXCR1/2 receptors, inflammation and  
41 circulating endothelial progenitor cells: The study on targets for treatment pathways in a model of  
42 subclinical cardiovascular disease (type 1 diabetes mellitus). *J Transl Med*. 2021 Dec 1;19(1).  
43  
44  
45 22. Monti P, Bonifacio E. Interleukin-7 and Type 1 Diabetes. *Curr Diab Rep*. 2014 Sep 5;14(9):518.  
46  
47  
48 23. Van Exel E, Gussekloo J, De Craen AJM, et al. Low production capacity of interleukin-10 associates  
49 with the metabolic syndrome and type 2 diabetes: The Leiden 85-plus study. *Diabetes*. 2002 Apr  
50 1;51(4):1088–92.  
51  
52  
53 24. Hauner H, Bender M, Haastert B, et al. Plasma concentrations of soluble TNF-alpha receptors in  
54 obese subjects. *Int J Obes*. 1998;22(12):1239–43.  
55  
56  
57 25. Ruan H, Lodish HF. Insulin resistance in adipose tissue: Direct and indirect effects of tumor necrosis  
58  
59  
60

1  
2  
3  
4  
5  
6  
7  
8  
9  
10  
11  
12  
13  
14  
15  
16  
17  
18  
19  
20  
21  
22  
23  
24  
25  
26  
27  
28  
29  
30  
31  
32  
33  
34  
35  
36  
37  
38  
39  
40  
41  
42  
43  
44  
45  
46  
47  
48  
49  
50  
51  
52  
53  
54  
55  
56  
57  
58  
59  
60

factor- $\alpha$ . Vol. 14, Cytokine and Growth Factor Reviews. Elsevier BV; 2003. p. 447–55.

26. Hotamisligil GS, Arner P, Caro JF, et al. Increased adipose tissue expression of tumor necrosis factor- $\alpha$  in human obesity and insulin resistance. *J Clin Invest*. 1995 May 1;95(5):2409–15.
27. Uysal KT, Wiesbrock SM, Marino MW, et al. Protection from obesity-induced insulin resistance in mice lacking TNF- $\alpha$  function. *Nature*. 1997;389(6651):610–4.
28. Bernstein LE, Berry J, Kim S, et al. Effects of etanercept in patients with the metabolic syndrome. *Arch Intern Med*. 2006 Apr 24;166(8):902–8.
29. Teragawa H, Morimoto T, Fujii Y, et al. Effect of Anagliptin versus Sitagliptin on Inflammatory Markers: Sub-Analysis from the REASON Trial. 2020;
30. Aso Y, Kase M, Sagara M, et al. Tenzeligliptin, a DPP-4 Inhibitor, Decreases Plasma Levels of Inflammatory Chemokines During a Standard Meal Test in Patients With Type 2 Diabetes. *Am J Med Sci*. 2020 Sep 1;360(3):261–7.
31. Bray JJH, Foster-Davies H, Salem A, et al. <sc>Glucagon-like peptide-1 receptor agonists</sc> improve biomarkers of inflammation and oxidative stress: A systematic review and meta-analysis of randomised controlled trials. *Diabetes, Obes Metab*. 2021 Aug 6;23(8):1806–22.
32. Savchenko LG, Digtar NI, Selikhova LG, et al. Liraglutide exerts an anti-inflammatory action in obese patients with type 2 diabetes. *Rom J Intern Med*. 2019 Sep 1;57(3):233–40.
33. Zhang J, Yi T, Cheng S, et al. Glucagon-like peptide-1 receptor agonist Exendin-4 improves neurological outcomes by attenuating TBI- induced inflammatory responses and MAPK activation in rats. *Int Immunopharmacol*. 2020 Sep 1;86:106715.
34. Liu Y-T, He T, Li H-Q, et al. Liraglutide improves pancreatic islet  $\beta$  cell apoptosis in rats with type 2 diabetes mellitus by inhibiting the IKK $\epsilon$ /NF- $\kappa$ B pathway. *Eur Rev Med Pharmacol Sci*. 2021 Jul;25(14):4818–28.
35. Ter Horst R, Van Den Munckhof ICL, Schraa K, et al. Sex-Specific Regulation of Inflammation and Metabolic Syndrome in Obesity. *Arterioscler Thromb Vasc Biol*. 2020;40(7):1787–800.
36. Chang SA. Smoking and type 2 diabetes mellitus. Vol. 36, *Diabetes and Metabolism Journal*. Korean Diabetes Association; 2012. p. 399–403.
37. Salazar JJ, Ennis WJ, Koh TJ. Diabetes medications: Impact on inflammation and wound healing. Vol. 30, *Journal of Diabetes and its Complications*. Elsevier Inc.; 2016. p. 746–52.
38. Yanbaeva DG, Dentener MA, Creutzberg EC, et al. Systemic effects of smoking. *Chest*. 2007 May

- 1  
2  
3  
4 1;131(5):1557–66.  
5  
6  
7 39. Amin K, Qadr SH, Hassan Hussein R, et al. Levels of cytokines and GADA in type I and II diabetic  
8 patients. *Prim Care Diabetes*. 2020 Feb 1;14(1):61–7.  
9  
10  
11 40. Yao Y, Li R, Du J, et al. Interleukin-6 and Diabetic Retinopathy: A Systematic Review and Meta-  
12 Analysis. *Curr Eye Res*. 2019 May 4;44(5):564–74.  
13  
14 41. Shelbaya S, Amer H, Seddik S, et al. Study of the role of interleukin-6 and highly sensitive C-reactive  
15 protein in diabetic nephropathy in type 1 diabetic patients. Vol. 16, *European Review for Medical and*  
16 *Pharmacological Sciences*. Eur Rev Med Pharmacol Sci; 2012. p. 176–82.  
17  
18 42. Herder C, Bongaerts BWC, Rathmann W, et al. Association of subclinical inflammation with  
19 polyneuropathy in the older population: KORA F4 study. *Diabetes Care*. 2013 Nov;36(11):3663–70.  
20  
21  
22 43. González-Clemente JM, Vilardell C, Broch M, et al. Lower heart rate variability is associated with  
23 higher plasma concentrations of IL-6 in type 1 diabetes. *Eur J Endocrinol*. 2007 Jul;157(1):31–8.  
24  
25 44. Aryan Z, Ghajar A, Faghihi-Kashani S, et al. Baseline High-Sensitivity C-Reactive Protein Predicts  
26 Macrovascular and Microvascular Complications of Type 2 Diabetes: A Population-Based Study.  
27 *Ann Nutr Metab*. 2018 May 1;72(4):287–95.  
28  
29 45. Pop-Busui R, Boulton AJM, Feldman EL, et al. Diabetic neuropathy: A position statement by the  
30 American diabetes association. *Diabetes Care*. 2017 Jan 1;40(1):136–54.  
31  
32 46. Mishra M, Kumar H, Bajpai S, et al. Level of serum IL-12 and its correlation with endothelial  
33 dysfunction, insulin resistance, proinflammatory cytokines and lipid profile in newly diagnosed type  
34 2 diabetes. *Diabetes Res Clin Pract*. 2011 Nov;94(2):255–61.  
35  
36 47. Ali M, Mali V, Haddox S, et al. Essential Role of IL-12 in Angiogenesis in Type 2 Diabetes. *Am J*  
37 *Pathol*. 2017 Nov 1;187(11):2590–601.  
38  
39 48. Marwaha AK, Tan S, Dutz JP. Targeting the IL-17/IFN- $\gamma$  axis as a potential new clinical therapy for  
40 type 1 diabetes. Vol. 154, *Clinical Immunology*. Academic Press Inc.; 2014. p. 84–9.  
41  
42 49. Pérez-López A, Valadés D, Vázquez Martínez C, et al. Serum IL-15 and IL-15R $\alpha$  levels are  
43 decreased in lean and obese physically active humans. *Scand J Med Sci Sport*. 2018 Mar  
44 1;28(3):1113–20.  
45  
46 50. Duan Y, Li F, Wang W, et al. Interleukin-15 in obesity and metabolic dysfunction: current  
47 understanding and future perspectives. Vol. 18, *Obesity Reviews*. Blackwell Publishing Ltd; 2017. p.  
48 1147–58.  
49  
50  
51  
52  
53  
54  
55  
56  
57  
58  
59  
60

1  
2  
3  
4  
5  
6  
7  
8  
9  
10  
11  
12  
13  
14  
15  
16  
17  
18  
19  
20  
21  
22  
23  
24  
25  
26  
27  
28  
29  
30  
31  
32  
33  
34  
35  
36  
37  
38  
39  
40  
41  
42  
43  
44  
45  
46  
47  
48  
49  
50  
51  
52  
53  
54  
55  
56  
57  
58  
59  
60

## FIGURE LEGENDS

**Figure 1:** Volcano plot displaying pairwise comparisons of inflammatory factors in type 2 diabetes and healthy controls. Vertical dashed lines indicate threshold for two-fold differences among groups. Horizontal dashed lines indicate p-value thresholds of 0.05, 0.01, and 0.001, respectively. ● p-value < 0.05, ○ above significance threshold. Only significant analytes are labeled.

**Figure 2:** Box plots displaying plasma concentrations of selected biomarkers in individuals with type 2 diabetes and 0 (n=20), 1 (n=43), 2 (n=28), or 3 or more (n=7) diabetic comorbidities (retinopathy, nephropathy, neuropathy, cardiac autonomic neuropathy). \*p<0.05, \*\*p<0.01

### Healthy versus type 2 diabetes

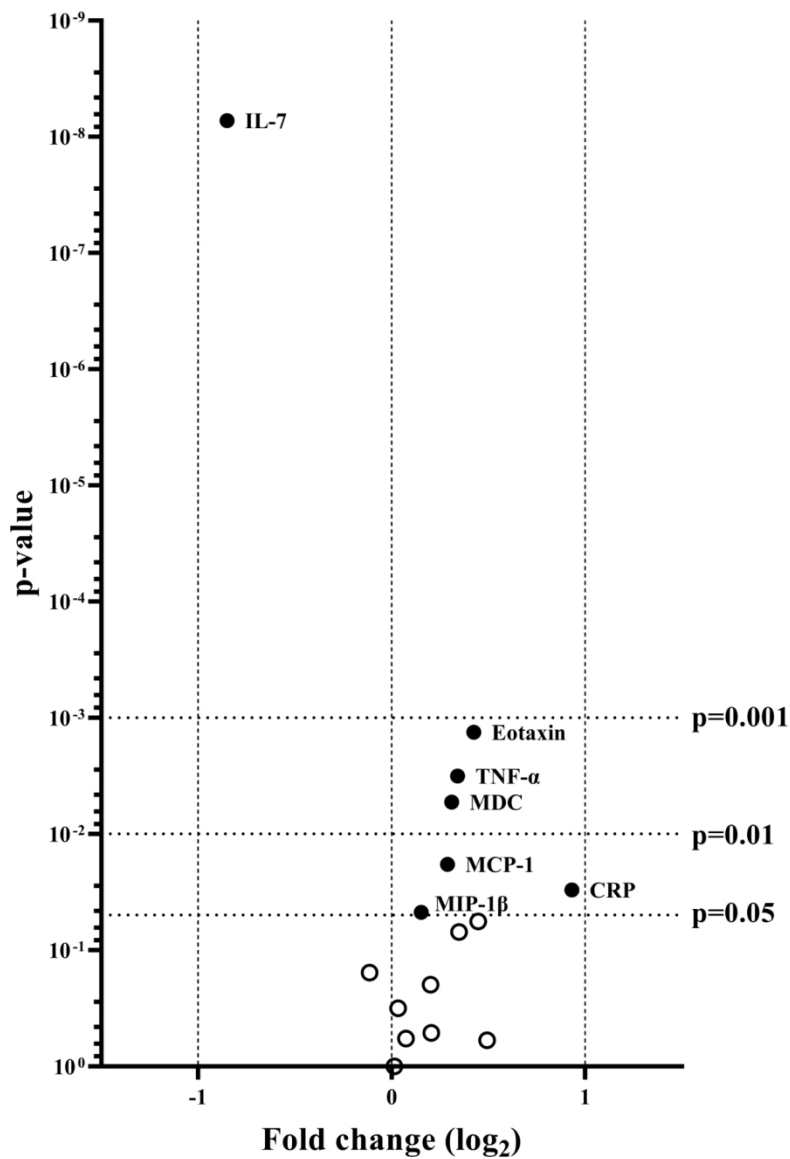

278x429mm (118 x 118 DPI)



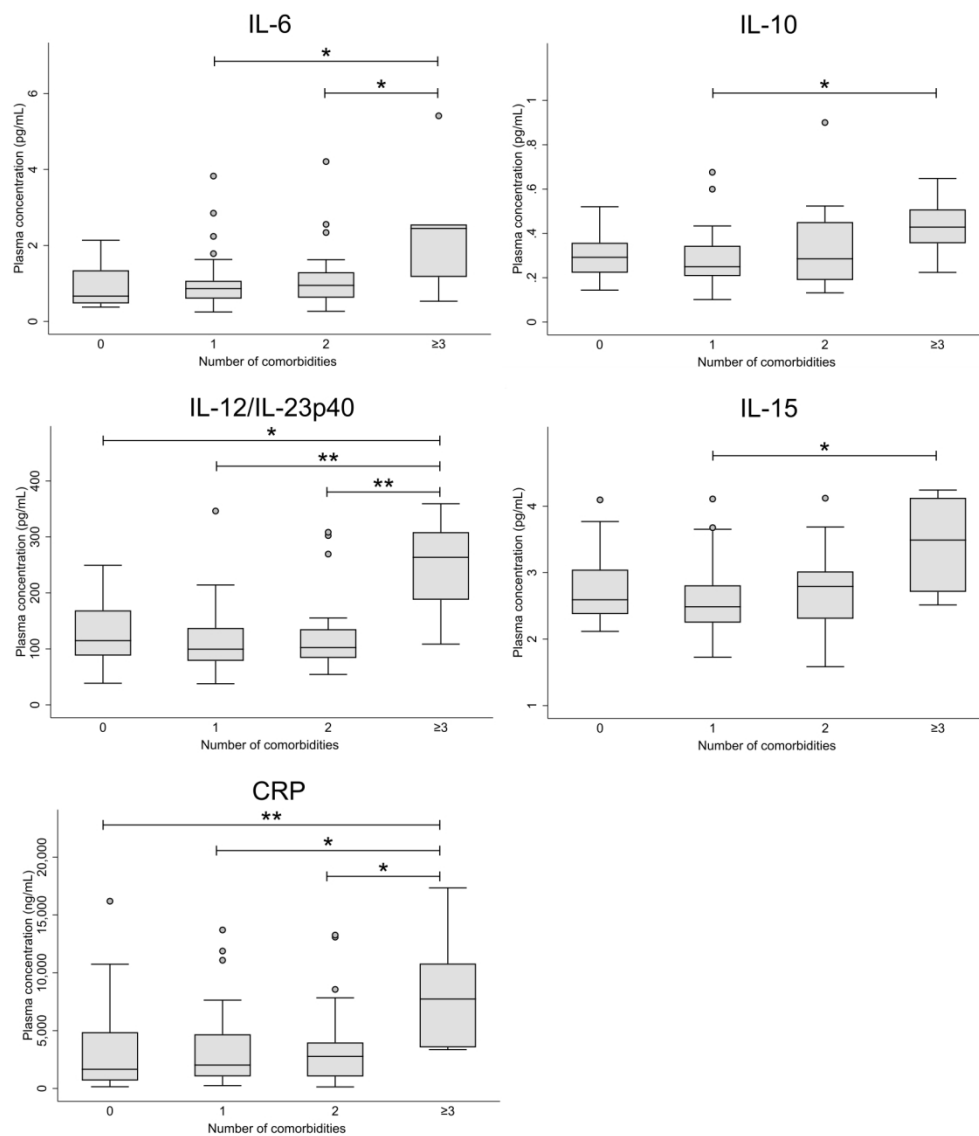

Box plots displaying plasma concentrations of biomarkers in individuals with type 2 diabetes and 0 (n=20), 1 (n=43), 2 (n=28), or 3 or more (n=7) diabetic comorbidities (retinopathy, nephropathy, neuropathy, cardiac autonomic neuropathy). Only analytes with p-values below 0.05 are shown. \*p<0.05, \*\*p<0.01

301x342mm (150 x 150 DPI)

## SUPPLEMENTARY TABLES

|                                | % of samples with estimated values†<br>(T2D/healthy) | % of excluded samples‡<br>(T2D/healthy) | Number of readings above 3 SD from group mean<br>(T2D/healthy) |
|--------------------------------|------------------------------------------------------|-----------------------------------------|----------------------------------------------------------------|
| IL-1 $\alpha$ §                | 95/95                                                | 3/5                                     | -                                                              |
| IL-1 $\beta$ §                 | 93/95                                                | 3/0                                     | -                                                              |
| IL-2§                          | 19/29                                                | 30/29                                   | -                                                              |
| IL-4§                          | 14/14                                                | 51/43                                   | -                                                              |
| IL-5§                          | 32/19                                                | 23/14                                   | -                                                              |
| <b>IL-6</b>                    | <b>0/0</b>                                           | <b>0/0</b>                              | <b>2/0</b>                                                     |
| <b>IL-7</b>                    | <b>0/0</b>                                           | <b>1/0</b>                              | <b>1/0</b>                                                     |
| <b>IL-8</b>                    | <b>0/0</b>                                           | <b>0/0</b>                              | <b>2/0</b>                                                     |
| <b>IL-10</b>                   | <b>0/0</b>                                           | <b>0/0</b>                              | <b>1/0</b>                                                     |
| <b>IL-12/IL-23p40</b>          | <b>0/0</b>                                           | <b>0/0</b>                              | <b>1/0</b>                                                     |
| IL-13§                         | 82/100                                               | 10/0                                    | -                                                              |
| <b>IL-15</b>                   | <b>0/0</b>                                           | <b>1/0</b>                              | <b>2/0</b>                                                     |
| <b>IL-16</b>                   | <b>0/0</b>                                           | <b>1/0</b>                              | <b>1/0</b>                                                     |
| IL-17A§                        | 0/0                                                  | 17/19                                   | -                                                              |
| <b>IFN-<math>\gamma</math></b> | <b>0/0</b>                                           | <b>0/0</b>                              | <b>2/0</b>                                                     |
| <b>TNF-<math>\alpha</math></b> | <b>0/0</b>                                           | <b>0/0</b>                              | <b>2/0</b>                                                     |
| TNF- $\beta$ §                 | 21/5                                                 | 33/19                                   | -                                                              |
| <b>Eotaxin</b>                 | <b>0/0</b>                                           | <b>1/0</b>                              | <b>0/0</b>                                                     |
| Eotaxin-3§                     | 0/0                                                  | 15/10                                   | -                                                              |
| <b>IP-10</b>                   | <b>0/0</b>                                           | <b>1/0</b>                              | <b>3/0</b>                                                     |
| <b>MCP-1</b>                   | <b>0/0</b>                                           | <b>1/0</b>                              | <b>0/0</b>                                                     |
| MCP-4§                         | 0/0                                                  | 1/10                                    | -                                                              |
| <b>MDC</b>                     | <b>0/0</b>                                           | <b>1/0</b>                              | <b>1/0</b>                                                     |
| MIP-1 $\alpha$ §               | 0/0                                                  | 10/5                                    | -                                                              |
| <b>MIP-1<math>\beta</math></b> | <b>0/0</b>                                           | <b>1/5</b>                              | <b>2/0</b>                                                     |
| <b>TARC</b>                    | <b>0/0</b>                                           | <b>1/0</b>                              | <b>2/0</b>                                                     |
| <b>CRP</b>                     | <b>0/0</b>                                           | <b>0/0</b>                              | <b>3/1</b>                                                     |

**Supplementary table 1:** Overview of MSD multiplex analysis and data handling. † calculated as the lower detection limit divided by the square root of two, ‡ excluded due to a coefficient of variance above 30%

between duplicates, § excluded from further analysis due to insufficient data quality. Boldface font indicates analytes included in the analysis.

|                       | Healthy<br>(n=21)    | Type 2 diabetes<br>(n=98) | p-value          |
|-----------------------|----------------------|---------------------------|------------------|
| <b>IL-6</b>           | 0.6 (0.4-0.9)        | 0.9 (0.6-1.3)             | 0.056            |
| <b>IL-7</b>           | 15.5 ± 5.0           | 8.2 (5.9-10.2)            | <b>&lt;0.001</b> |
| <b>IL-8</b>           | 12.1 ± 3.8           | 12.4 (8.8-16.7)           | 0.514            |
| <b>IL-10</b>          | 0.2 (0.2-0.3)        | 0.3 (0.2-0.4)             | 0.198            |
| <b>IL-12/IL-23p40</b> | 100.9 ± 45.5         | 107.5 (82.9-145.8)        | 0.070            |
| <b>IL-15</b>          | 2.7 ± 0.4            | 2.6 (2.3-3.0)             | 0.999            |
| <b>IL-16</b>          | 225.0 ± 53.9         | 208.0 ± 48.4              | 0.156            |
| <b>IFN-γ</b>          | 5.1 ± 2.4            | 5.2 (3.1-7.7)             | 0.594            |
| <b>TNF-α</b>          | 1.2 ± 0.2            | 1.5 (1.3-1.8)             | <b>0.003</b>     |
| <b>Eotaxin</b>        | 267.6 ± 74.3         | 339.9 (259.8-434.1)       | <b>0.001</b>     |
| <b>IP-10</b>          | 539.4 (397.7-767.9)  | 575.9 (443.6-725.4)       | 0.576            |
| <b>MCP-1</b>          | 243.3 (215.9-287.8)  | 323.1 ± 105.0             | <b>0.018</b>     |
| <b>MDC</b>            | 912.3 ± 255.5        | 1059.7 (887.9-1279.2)     | <b>0.005</b>     |
| <b>MIP-1β</b>         | 131.5 (102.0-167.8)  | 161.9 ± 48.3              | <b>0.047</b>     |
| <b>TARC</b>           | 218.6 (120.7-531.7)  | 275.4 (168.6-412.4)       | 0.316            |
| <b>CRP (ng/mL)</b>    | 871.3 (528.6-3353.3) | 2769.3 (1037.6-5236.5)    | <b>0.030</b>     |

**Supplementary table 2:** Plasma concentrations of inflammatory factors. Results (in pg/mL, unless otherwise stated) displayed as either mean ± SD or median (1<sup>st</sup>-3<sup>rd</sup> quartiles) based on distribution of the data. Boldface font indicates statistical significance (p<0.05).

STROBE Statement—Checklist of items that should be included in reports of *cross-sectional studies*

|                              | Item No | Recommendation                                                                                                                                                                                    | Page No            |
|------------------------------|---------|---------------------------------------------------------------------------------------------------------------------------------------------------------------------------------------------------|--------------------|
| <b>Title and abstract</b>    | 1       | (a) Indicate the study's design with a commonly used term in the title or the abstract                                                                                                            | 2                  |
|                              |         | (b) Provide in the abstract an informative and balanced summary of what was done and what was found                                                                                               | 2                  |
| <b>Introduction</b>          |         |                                                                                                                                                                                                   |                    |
| Background/rationale         | 2       | Explain the scientific background and rationale for the investigation being reported                                                                                                              | 3                  |
| Objectives                   | 3       | State specific objectives, including any prespecified hypotheses                                                                                                                                  | 4                  |
| <b>Methods</b>               |         |                                                                                                                                                                                                   |                    |
| Study design                 | 4       | Present key elements of study design early in the paper                                                                                                                                           | 4                  |
| Setting                      | 5       | Describe the setting, locations, and relevant dates, including periods of recruitment, exposure, follow-up, and data collection                                                                   | 4                  |
| Participants                 | 6       | (a) Give the eligibility criteria, and the sources and methods of selection of participants                                                                                                       | 4                  |
| Variables                    | 7       | Clearly define all outcomes, exposures, predictors, potential confounders, and effect modifiers. Give diagnostic criteria, if applicable                                                          | 4-5                |
| Data sources/<br>measurement | 8*      | For each variable of interest, give sources of data and details of methods of assessment (measurement). Describe comparability of assessment methods if there is more than one group              | 4-5                |
| Bias                         | 9       | Describe any efforts to address potential sources of bias                                                                                                                                         | 4-5                |
| Study size                   | 10      | Explain how the study size was arrived at                                                                                                                                                         | Secondary analysis |
| Quantitative variables       | 11      | Explain how quantitative variables were handled in the analyses. If applicable, describe which groupings were chosen and why                                                                      | 5                  |
| Statistical methods          | 12      | (a) Describe all statistical methods, including those used to control for confounding                                                                                                             | 5                  |
|                              |         | (b) Describe any methods used to examine subgroups and interactions                                                                                                                               | 5                  |
|                              |         | (c) Explain how missing data were addressed                                                                                                                                                       | 5                  |
|                              |         | (d) If applicable, describe analytical methods taking account of sampling strategy                                                                                                                | n/a                |
|                              |         | (e) Describe any sensitivity analyses                                                                                                                                                             | n/a                |
| <b>Results</b>               |         |                                                                                                                                                                                                   |                    |
| Participants                 | 13*     | (a) Report numbers of individuals at each stage of study—eg numbers potentially eligible, examined for eligibility, confirmed eligible, included in the study, completing follow-up, and analysed | Secondary analysis |
|                              |         | (b) Give reasons for non-participation at each stage                                                                                                                                              | n/a                |
|                              |         | (c) Consider use of a flow diagram                                                                                                                                                                | n/a                |
| Descriptive data             | 14*     | (a) Give characteristics of study participants (eg demographic, clinical, social) and information on exposures and potential confounders                                                          | Table 1            |
|                              |         | (b) Indicate number of participants with missing data for each variable of interest                                                                                                               | Supp. material     |

|                          |     |                                                                                                                                                                                                              |                     |
|--------------------------|-----|--------------------------------------------------------------------------------------------------------------------------------------------------------------------------------------------------------------|---------------------|
| Outcome data             | 15* | Report numbers of outcome events or summary measures                                                                                                                                                         |                     |
| Main results             | 16  | (a) Give unadjusted estimates and, if applicable, confounder-adjusted estimates and their precision (eg, 95% confidence interval). Make clear which confounders were adjusted for and why they were included | Table 2,<br>Table 3 |
|                          |     | (b) Report category boundaries when continuous variables were categorized                                                                                                                                    | n/a                 |
|                          |     | (c) If relevant, consider translating estimates of relative risk into absolute risk for a meaningful time period                                                                                             | n/a                 |
| Other analyses           | 17  | Report other analyses done—eg analyses of subgroups and interactions, and sensitivity analyses                                                                                                               | n/a                 |
| <b>Discussion</b>        |     |                                                                                                                                                                                                              |                     |
| Key results              | 18  | Summarise key results with reference to study objectives                                                                                                                                                     | 11                  |
| Limitations              | 19  | Discuss limitations of the study, taking into account sources of potential bias or imprecision. Discuss both direction and magnitude of any potential bias                                                   | 14                  |
| Interpretation           | 20  | Give a cautious overall interpretation of results considering objectives, limitations, multiplicity of analyses, results from similar studies, and other relevant evidence                                   | 14-15               |
| Generalisability         | 21  | Discuss the generalisability (external validity) of the study results                                                                                                                                        | 14-15               |
| <b>Other information</b> |     |                                                                                                                                                                                                              |                     |
| Funding                  | 22  | Give the source of funding and the role of the funders for the present study and, if applicable, for the original study on which the present article is based                                                | 15                  |

\*Give information separately for exposed and unexposed groups.

**Note:** An Explanation and Elaboration article discusses each checklist item and gives methodological background and published examples of transparent reporting. The STROBE checklist is best used in conjunction with this article (freely available on the Web sites of PLoS Medicine at <http://www.plosmedicine.org/>, Annals of Internal Medicine at <http://www.annals.org/>, and Epidemiology at <http://www.epidem.com/>). Information on the STROBE Initiative is available at [www.strobe-statement.org](http://www.strobe-statement.org).

# BMJ Open

## Low-grade inflammation in type 2 diabetes: A cross-sectional study from a Danish diabetes out-patient clinic

|                                 |                                                                                                                                                                                                                                                                                                                                                                                                                                                                                                                                                                                                                                                                                                                                             |
|---------------------------------|---------------------------------------------------------------------------------------------------------------------------------------------------------------------------------------------------------------------------------------------------------------------------------------------------------------------------------------------------------------------------------------------------------------------------------------------------------------------------------------------------------------------------------------------------------------------------------------------------------------------------------------------------------------------------------------------------------------------------------------------|
| Journal:                        | <i>BMJ Open</i>                                                                                                                                                                                                                                                                                                                                                                                                                                                                                                                                                                                                                                                                                                                             |
| Manuscript ID                   | bmjopen-2022-062188.R1                                                                                                                                                                                                                                                                                                                                                                                                                                                                                                                                                                                                                                                                                                                      |
| Article Type:                   | Original research                                                                                                                                                                                                                                                                                                                                                                                                                                                                                                                                                                                                                                                                                                                           |
| Date Submitted by the Author:   | 08-Sep-2022                                                                                                                                                                                                                                                                                                                                                                                                                                                                                                                                                                                                                                                                                                                                 |
| Complete List of Authors:       | Okdahl, Tina; Aalborg University Hospital, Mech-Sense, Department of Gastroenterology and Hepatology<br>Wegeberg, Anne-Marie; Aalborg University Hospital, Mech-Sense, Department of Gastroenterology & Hepatology, ; Aalborg Universitet, Department of Clinical Medicine<br>Pociot, Flemming; Steno Diabetes Center Copenhagen; University of Copenhagen Faculty of Health and Medical Sciences<br>Brock, Birgitte; Steno Diabetes Center Copenhagen<br>Størling, Joachim; Steno Diabetes Center Copenhagen; University of Copenhagen, Department of Biomedical Sciences<br>Brock, Christina; Aalborg University Hospital, Mech-Sense, Department of Gastroenterology and Hepatology; Aalborg University, Department of Clinical Medicine |
| <b>Primary Subject Heading</b>: | Diabetes and endocrinology                                                                                                                                                                                                                                                                                                                                                                                                                                                                                                                                                                                                                                                                                                                  |
| Secondary Subject Heading:      | Immunology (including allergy)                                                                                                                                                                                                                                                                                                                                                                                                                                                                                                                                                                                                                                                                                                              |
| Keywords:                       | DIABETES & ENDOCRINOLOGY, IMMUNOLOGY, Diabetic neuropathy < DIABETES & ENDOCRINOLOGY                                                                                                                                                                                                                                                                                                                                                                                                                                                                                                                                                                                                                                                        |
|                                 |                                                                                                                                                                                                                                                                                                                                                                                                                                                                                                                                                                                                                                                                                                                                             |

SCHOLARONE™  
Manuscripts



I, the Submitting Author has the right to grant and does grant on behalf of all authors of the Work (as defined in the below author licence), an exclusive licence and/or a non-exclusive licence for contributions from authors who are: i) UK Crown employees; ii) where BMJ has agreed a CC-BY licence shall apply, and/or iii) in accordance with the terms applicable for US Federal Government officers or employees acting as part of their official duties; on a worldwide, perpetual, irrevocable, royalty-free basis to BMJ Publishing Group Ltd ("BMJ") its licensees and where the relevant Journal is co-owned by BMJ to the co-owners of the Journal, to publish the Work in this journal and any other BMJ products and to exploit all rights, as set out in our [licence](#).

The Submitting Author accepts and understands that any supply made under these terms is made by BMJ to the Submitting Author unless you are acting as an employee on behalf of your employer or a postgraduate student of an affiliated institution which is paying any applicable article publishing charge ("APC") for Open Access articles. Where the Submitting Author wishes to make the Work available on an Open Access basis (and intends to pay the relevant APC), the terms of reuse of such Open Access shall be governed by a Creative Commons licence – details of these licences and which [Creative Commons](#) licence will apply to this Work are set out in our licence referred to above.

Other than as permitted in any relevant BMJ Author's Self Archiving Policies, I confirm this Work has not been accepted for publication elsewhere, is not being considered for publication elsewhere and does not duplicate material already published. I confirm all authors consent to publication of this Work and authorise the granting of this licence.

**TITLE PAGE**

**Full Title:** Low-grade inflammation in type 2 diabetes: A cross-sectional study from a Danish diabetes out-patient clinic

**Authors:**

Tina Okdahl<sup>1</sup>, Anne-Marie Wegeberg<sup>1,2</sup>, Flemming Pociot<sup>3,4</sup>, Birgitte Brock<sup>3</sup>, Joachim Størling<sup>3,5</sup>, Christina Brock<sup>1,2</sup>

<sup>1</sup>Mech-Sense, Department of Gastroenterology and Hepatology, Aalborg University Hospital, Aalborg, Denmark

<sup>2</sup>Department of Clinical Medicine, Aalborg University, Søndre Skovvej 15, 9000 Aalborg, Denmark

<sup>3</sup>Steno Diabetes Center Copenhagen, Gentofte, Denmark

<sup>4</sup>Faculty of Health and Medical Sciences, University of Copenhagen, Copenhagen, Denmark

<sup>5</sup>Department of Biomedical Sciences, University of Copenhagen, Copenhagen, Denmark

**Corresponding Author:**

Professor Christina Brock, DVM, PhD

Mech-Sense, Department of Gastroenterology and Hepatology, Aalborg University Hospital and Clinical Institute, Aalborg University, Mølleparkvej 4, Aalborg 9000, Denmark

Telephone: +45 9766 0510, e-mail: [christina.brock@rn.dk](mailto:christina.brock@rn.dk)

**Word count:** 3967

**Keywords:** Diabetes, inflammation, comorbidity, cytokine, chemokine



## STRUCTURED ABSTRACT

**Objectives:** To investigate low-grade inflammation in type 2 diabetes and explore associations to clinical aspects as well as micro- and macrovascular complications.

**Design:** Cross-sectional analysis

**Setting:** The out-patient diabetes clinic at the department of endocrinology at Aalborg University Hospital, Denmark

**Participants:** 100 participants with type 2 diabetes confirmed by a HbA1C  $\geq$  6.5% for a minimum of one year and 21 healthy controls

**Outcome measures:** Plasma levels of 27 inflammation-related biomarkers measured by immunoassay. Associations with micro-and macrovascular complications, body weight, glycemc control, medication, and sex were investigated in the diabetes cohort.

**Results:** Plasma levels of TNF- $\alpha$  and eotaxin, were elevated in type 2 diabetes ( $p < 0.05$ ), while IL-7 was decreased ( $p < 0.001$ ). IL-12/IL-23p40, IL-15, MDC, and CRP levels were increased with body weight ( $p < 0.05$ ), while eotaxin and TNF- $\alpha$  were increased with elevated HbA1c levels ( $p < 0.04$ ). DPP-4 inhibitor therapy was associated with lower levels of IP-10, MDC, and TARC ( $p < 0.02$ ), while females had higher levels of MDC ( $p = 0.027$ ). Individuals with  $\geq 3$  diabetic complications had elevated levels of IL-6, IL-10, IL-12/IL-23p40, IL-15, and CRP compared to those with  $\leq 3$  ( $p < 0.05$ ).

**Conclusion:** The level of low-grade inflammation in type 2 diabetes is associated with obesity, glycemc regulation, therapeutical management, sex, and complications. Our results underline the importance of addressing inflammatory issues in type 2 diabetes, as these may predispose for crippling comorbidities.

### Strengths and limitations of this study:

- Analysis of a broad palette of inflammatory biomarkers in plasma in 100 participants with type 2 diabetes and 21 healthy controls
- High degree of heterogeneity of our cohort, which allows for generalization to the population of type 2 diabetes
- Well-characterized cohort in regard to micro- and macrovascular comorbidities
- The cross-sectional design is a limitation of the study and hinders any assumptions of causality
- This study is based on secondary analysis and thus inclusion and exclusion criteria were not designed specifically with the investigation of inflammatory biomarkers in mind

## 1 INTRODUCTION

Tight glycaemic regulation is vital for balancing the existing energy demand in tissues by combining resources originating from the nutritional supply and release from internal storages. Low blood glucose is potentially life-threatening, while long-term elevated levels have several metabolic consequences, including sorbitol production, mitochondrial dysfunction, and formation of advanced glycation end products (1).

Chronic hyperglycemia can be caused either by insulin deficiency, as seen in type 1 diabetes, or by a combination of generalized insulin resistance in peripheral tissues and insufficient insulin production resulting in type 2 diabetes. The latter is the most prevalent diabetes type accounting for up to 90% of the cases (2).

The pathogenesis of type 2 diabetes is highly complex and multifactorial, and many aspects of the disease require further elucidation. However, it is clear that obesity along with a sedentary lifestyle is a substantial risk factor for development of insulin resistance and type 2 diabetes through stress-induced inflammation in adipose tissue leading to insensitivity of the insulin receptor (3). In recent years, the previous view on adipose tissue as a mere storage of fat has been disproved, and it is now accepted that especially visceral adipose tissue possesses important endocrine and inflammatory properties. As an example, adipocytes activated by expansion-associated hypoxia secrete cytokines and so-called adipokines, many of which are pro-inflammatory in nature (4). As the prevalence of both obesity and type 2 diabetes continue to rise worldwide (2), a better understanding of the inflammatory link between these lifestyle-associated conditions is crucial.

In addition to obesity-induced inflammation, excess glucose availability in diabetes causes alterations in normal homeostasis, facilitating the progression of proinflammatory cytokine release to the microenvironment. Low-grade systemic inflammation is thus regarded as an accompanying condition in type 2 diabetes (5). Increased levels of proinflammatory biomarkers such as interleukin (IL) 6 and C-reactive protein (CRP) have been shown to be associated with an increased risk of type 2 diabetes development in several prospective studies (6,7). This suggests that the pathogenetic mechanisms in type 2 diabetes is influenced by systemic low-grade inflammation. It is, however, unclear whether this proinflammatory state remains during the course of the disease or if it increases or diminishes over time. In addition, standard medical treatment in type 2 diabetes such as statins and dipeptidyl peptidase-4 (DPP-4) inhibitors have immunomodulating properties and may thus influence the inflammatory response (8,9).

The low-grade systemic inflammation in type 2 diabetes is clinically essential, because it is associated with the development and progression of long-term complications such as nephropathy, neuropathy and retinopathy (10–12). Moreover, low-grade inflammation is associated with cardiovascular disease in diabetes (13), which is the primary cause of morbidity and mortality in individuals with type 2 diabetes (14).

1  
2  
3  
4 The aim of this study was to investigate the level of low-grade systemic inflammation in a cohort of  
5 individuals with type 2 diabetes with varying disease duration. We hypothesized that individuals with type 2  
6 diabetes exhibited higher levels of pro-inflammatory biomarkers than healthy controls, and accordingly, the  
7 primary endpoint was differences in circulating inflammatory biomarkers in healthy and people with type 2  
8 diabetes. Furthermore, we hypothesized that levels of pro-inflammatory biomarkers in type 2 diabetes were  
9 associated with disease duration, obesity, glycemic control, therapeutical management, and presence of  
10 diabetes-related micro- and macrovascular complications. The secondary endpoints were thus to investigate  
11 associations between inflammatory biomarkers and clinical characteristics of type 2 diabetes.  
12  
13  
14  
15  
16

## 17 **2 METHODS**

### 18 **2.1 Study population**

19  
20 All individuals with type 2 diabetes scheduled for regular health visits at the out-patient diabetes clinic at the  
21 department of endocrinology at Aalborg University Hospital, Denmark were informed about the study and  
22 screened for eligibility after signing of the informed consent form, and 100 participants were included for  
23 cross-sectional analysis. Inclusion criteria included Northern European descent, age above 18 years, a  
24 verified diagnosis of type 2 diabetes with HbA1C  $\geq$  6.5% for a minimum of one year, and stable diabetes  
25 treatment. People with other endocrinological or neurological diseases were excluded. Prior to study  
26 initiation, the protocol was approved by The North Denmark Region Committee on Health Research Ethics,  
27 Denmark (N-20170045). The primary outcome of the study was cardiac vagal tone and the results have been  
28 published elsewhere (15). The control cohort consisted of sex-matched healthy volunteers (n=21) recruited  
29 for a randomized controlled trial (N-20090008) likewise conducted by our research group.  
30  
31  
32  
33  
34  
35  
36

### 37 **2.2 Blood samples**

38 Morning blood samples were drawn from the cubital vein after a fasting period of minimum six hours. For  
39 analysis of inflammatory biomarkers, blood was collected in EDTA tubes and centrifuged for 10 minutes at  
40 1000 g. Isolated plasma was aliquoted in appropriate volumes and stored in a biobank at -80°C until the  
41 complete data set was collected. All samples were thawed just prior to analysis. Samples from both cohorts  
42 were analyzed consecutively to minimize interplate variability. For analysis of hemoglobin A1c (HbA1c),  
43 blood was collected in lithium heparin tubes and analyzed by routine biochemical procedures.  
44  
45  
46  
47  
48  
49

### 50 **2.3 Inflammatory biomarkers**

51 Biomarker concentrations in plasma samples were analyzed using the V-PLEX Neuroinflammation Panel 1  
52 Human Kit (Meso Scale Diagnostics® [MSD], Gaithersburg, MD, USA) on a MESO QuickPlex SQ 120  
53 instrument (MSD) according to the manufacturer's specifications. Sample values below the detection limit of  
54 the assay were assigned a value of the detection limit divided by  $\sqrt{2}$  (16). If more than 30% of the measured  
55 samples for any given biomarker were below the detection limit, the biomarker was excluded from the  
56 analysis. Likewise, samples with a coefficient of variation (CV)  $>$ 30% between duplicate measurements  
57  
58  
59  
60

1  
2  
3  
4 were excluded from the analysis (Supplementary Table 1). Biomarkers on the panel included: IL-1 $\alpha$ , IL-1 $\beta$ ,  
5 IL-2, IL-4, IL-5, IL-6, IL-7, IL-8, IL-10, IL-12/IL-23p40, IL-13, IL-15, IL-16, IL-17A, interferon (IFN)- $\gamma$ ,  
6 IL-2, IL-4, IL-5, IL-6, IL-7, IL-8, IL-10, IL-12/IL-23p40, IL-13, IL-15, IL-16, IL-17A, interferon (IFN)- $\gamma$ ,  
7 tumor necrosis factor (TNF)- $\alpha$ , TNF- $\beta$ , eotaxin, eotaxin-3, IFN- $\gamma$ -induced protein (IP)-10, monocyte  
8 chemoattractant protein (MCP)-1, MCP-4, macrophage-derived chemokine (MDC), macrophage  
9 inflammatory protein (MIP)-1 $\alpha$ , MIP-1 $\beta$ , thymus and activation regulated chemokine (TARC), and CRP.  
10  
11

#### 12 13 **2.4 Assessment of diabetic comorbidities**

14 All participants in the type 2 diabetes cohort underwent investigations concerning common diabetic  
15 comorbidities: 1) *Peripheral neuropathy*: Signs of peripheral neuropathy was investigated by vibration  
16 perception threshold (VPT) at the dorsum of the first phalanx using a biothesiometer (Bio-Medical  
17 Instruments). The measurement was done three consecutive times bilaterally, and the final vibration  
18 perception threshold was calculated as the mean value of both feet. Results above 18 volts were considered  
19 abnormal and thus as signs of diabetic peripheral neuropathy. 2) *Nephropathy*: Morning urine samples were  
20 collected by participants at home and handed over to study personnel for standard biochemical analysis.  
21 Diabetic nephropathy was defined as a urine albumin/creatinine ratio above 30 mg/g, which is a standard cut-  
22 off for early diabetic nephropathy and microalbuminuria. 3) *Retinopathy*: Participants were asked if they had  
23 ever been diagnosed with proliferative or non-proliferative retinopathy 4) *Cardiac autonomic neuropathy*:  
24 Electrocardiographic recordings by the VAGUS™ device (Medicus Engineering Aps, Aarhus, Denmark)  
25 were applied for evaluation of cardiac autonomic neuropathy. Recordings were made during rest, postural  
26 change, deep breathing, and the Valsalva maneuver. Abnormal results in one or more exercises were  
27 considered as signs of cardiac autonomic neuropathy.  
28  
29  
30  
31  
32  
33  
34  
35  
36

#### 37 **2.5 Data handling and statistics**

38 Distribution of raw and log-transformed data was evaluated by Shapiro-Wilk test of normality. Pairwise  
39 comparisons among groups were achieved by independent samples t-test or Mann-Whitney U based on data  
40 distribution. Differences in inflammatory biomarkers between healthy and type 2 diabetes were investigated  
41 firstly by pairwise comparisons and secondly by a logistic regression model including age and BMI as  
42 confounders, as these factors were different between groups and known to influence systemic low-grade  
43 inflammation. For the volcano plot, the fold difference was calculated as the log<sub>2</sub>-ratio between two group  
44 means. Differences in inflammatory biomarkers between people with short- and long-term disease duration  
45 were likewise investigated by a logistic regression model including age and BMI as confounders. Multiple  
46 logistic regression analyses were performed to investigate the association between clinical parameters and  
47 inflammatory biomarkers. The independent variables included obesity (BMI<30 versus BMI>30), blood  
48 glucose level (HbA1c<55 versus HbA1c>55), DPP-4 inhibitor therapy, GLP-1 receptor agonist therapy, and  
49 sex. Additionally, two models were applied in which associations were adjusted for the remaining clinical  
50 variables, and total plasma cholesterol or statin therapy, all of which may have an impact on the systemic  
51  
52  
53  
54  
55  
56  
57  
58  
59  
60

inflammatory status. Differences in inflammatory biomarkers between people with 0, 1, 2 or  $\geq 3$  comorbidities were investigated by a Bonferroni-corrected ANOVA and subsequently the Dunn's Test. An  $\alpha$ -level of 0.05 was applied for all analyses. The STATA software (StataCorp LLC, version 15.1) was applied for all statistical analyses.

## 2.6 Patient and public involvement

Patients or members of the public were not included in the design, conduction, reporting, or dissemination plans of this project.

## 3 RESULTS

### 3.1 Study population

Two subjects in the type 2 diabetes group were excluded due to hemolysis of collected blood samples. Individuals in the diabetes group were older, had higher BMI, and higher HbA1c compared to the healthy controls ( $p < 0.001$ ). On the contrary, healthy controls had higher total cholesterol ( $p < 0.001$ ), high-density lipoprotein (HDL) ( $p = 0.006$ ), and low-density lipoprotein (LDL) ( $p < 0.001$ ) compared to individuals in the type 2 diabetes cohort of which 66% were on lipid-lowering statin therapy. A full demographic overview can be found in Table 1.

|                                    | Healthy<br>(n=21) | Type 2 diabetes<br>(n=98) | p-value |
|------------------------------------|-------------------|---------------------------|---------|
| <b>Basic demography</b>            |                   |                           |         |
| Age (years)                        | 52 (48-55)        | 65 (56-71)                | <0.001  |
| Sex (% of males)                   | 71                | 63                        | 0.478   |
| BMI (kg/m <sup>2</sup> )           | 25.6 (23.7-28.0)  | 31.4 (27.5-34.5)          | <0.001  |
| Current smokers (%)                | 19                | 5                         | 0.028   |
| Disease duration (y)               | -                 | 10 (5-17)                 | -       |
| <b>Vital signs</b>                 |                   |                           |         |
| Systolic BP (mmHg)                 | 128 (119-137)     | 137 (128-147)             | 0.021   |
| Diastolic BP (mmHg)                | 76 ± 11           | 77 ± 9                    | 0.720   |
| Pulse (beats/min)                  | 66 ± 7            | 69.8 ± 10                 | 0.110   |
| <b>Biochemistry</b>                |                   |                           |         |
| HbA1c                              |                   |                           |         |
| (mmol/mol)                         | 33 (33-37)        | 55 (48-61.5)              | <0.001  |
| (%)                                | 5.2 (5.2-5.5)     | 7.2 (6.5-7.8)             | <0.001  |
| Cholesterol (mmol/l)               | 5.4 ± 0.9         | 3.9 ± 0.9                 | <0.001  |
| eGFR (mL/min/1.73 m <sup>2</sup> ) |                   |                           |         |

|                            |               |               |                  |
|----------------------------|---------------|---------------|------------------|
| >90 (%)                    | 62            | 46            | 0.197            |
| 40-90 (%)                  | 38            | 52            | 0.264            |
| <40 (%)                    | 0             | <1            | 0.507            |
| HDL (mmol/l)               | 1.5 (1.3-1.8) | 1.2 (1.0-1.5) | <b>0.006</b>     |
| LDL (mmol/l)               | 3.3 ± 0.9     | 1.9 ± 0.7     | <b>&lt;0.001</b> |
| Triglycerides (mmol/l)     | 1.1 (0.7-1.4) | 1.4 (1.0-2.0) | <b>0.023</b>     |
| <b>Medication</b>          |               |               |                  |
| Antihypertensives (%)      | -             | 67            | -                |
| DPP-4 inhibitor (%)        | -             | 18            | -                |
| Metformin (%)              | -             | 78            | -                |
| SGLT-2 inhibitor (%)       | -             | 23            | -                |
| GLP-1 receptor agonist (%) | -             | 23            | -                |
| Statins (%)                | -             | 66            | -                |

**Table 1:** Demographic and clinical characteristics among groups. Results displayed as either mean ± SD or median (1<sup>st</sup>-3<sup>rd</sup> quartiles) based on distribution of the data. Boldface font indicates statistical significance (p<0.05). Antihypertensive medication includes ACE inhibitors, angiotensin II receptor antagonists, calcium channel blockers, beta blockers, diuretics, and I1-imidazoline receptor antagonists. BMI: Body mass index; eGFR: Estimated glomerular filtration rate; HDL: High-density lipoprotein; LDL: Low-density lipoprotein; DPP-4: Dipeptidyl peptidase-4; SGLT: Sodium-glucose transport protein; GLP: Glucagon-like peptide.

### 3.2 Inflammatory biomarkers in type 2 diabetes compared to healthy

Plasma levels of 27 inflammatory biomarkers were measured in individuals with type 2 diabetes and healthy controls. Eleven biomarkers were excluded from the statistical analyses due to being undetectable or of insufficient measurement quality due to low levels (Supplementary Table 1). The remaining 16 biomarkers (IL-6, IL-7, IL-8, IL-10, IL-12/IL-23p40, IL-15, IL-16, IFN- $\gamma$ , TNF- $\alpha$ , eotaxin, IP-10, MCP-1, MDC, MIP-1 $\beta$ , TARC, CRP) were measured in  $\geq 95\%$  of the samples. The concentrations of TNF- $\alpha$  (p = 0.003) and CRP (p=0.030) were significantly higher in the type 2 diabetes cohort compared to the control cohort (Figure 1). Similarly, 4 chemokines (eotaxin (p=0.001), MCP-1 (p=0.018), MDC (p=0.005), and MIP-1 $\beta$  (p=0.047)) showed elevated levels in the diabetes cohort. In contrast, the level of cytokine IL-7 was significantly lower in participants with type 2 diabetes compared to healthy controls (p<0.001). After adjustment for age and BMI, only IL-7, eotaxin, and TNF- $\alpha$  remained significantly different. Plasma concentrations of all measured biomarkers are presented in supplementary Table 2. When subdividing the type 2 diabetes cohort according to disease duration, only IL-10 was significantly different (p=0.008) between groups, even after adjustment for age and BMI, with a modestly increased levels found in subjects with disease duration above ten years.

(Table 2).

|                            |               | UNADJUSTED MODEL      |              | ADJUSTED MODEL        |              |
|----------------------------|---------------|-----------------------|--------------|-----------------------|--------------|
|                            |               | OR (95% CI)           | p-value      | OR (95% CI)           | p-value      |
| Cytokines                  | IL-7          | 1.03 (0.93-1.15)      | 0.565        | 1.04 (0.93-1.18)      | 0.466        |
|                            | IL-12         |                       |              |                       |              |
|                            | /IL-23p40     | 1.00 (1.00-1.00)      | 0.446        | 1.00 (0.99-1.01)      | 0.717        |
|                            | IL-15         | 1.51 (0.74-3.10)      | 0.256        | 1.32 (0.62-2.79)      | 0.471        |
|                            | IL-16         | 1.00 (1.00-1.00)      | 0.832        | 1.00 (1.00-1.00)      | 0.813        |
| Chemokines                 | Eotaxin       | 1.00 (1.00-1.00)      | 0.887        | 1.00 (1.00-1.00)      | 0.687        |
|                            | IP-10         | 1.00 (1.00-1.00)      | 0.512        | 1.00 (1.00-1.00)      | 0.244        |
|                            | MCP-1         | 1.00 (1.00-1.00)      | 0.864        | 1.00 (1.00-1.00)      | 0.523        |
|                            | MDC           | 1.00 (1.00-1.00)      | 0.810        | 1.00 (1.00-1.00)      | 0.319        |
|                            | MIP-1 $\beta$ | 1.00 (0.99-1.01)      | 0.992        | 1.00 (0.99-1.01)      | 0.916        |
|                            | TARC          | 1.00 (1.00-1.00)      | 0.719        | 1.00 (1.00-1.00)      | 0.260        |
| Pro-inflammatory cytokines | IL-6          | 1.34 (0.79-2.27)      | 0.271        | 1.21 (0.70-2.09)      | 0.504        |
|                            | IL-8          | 1.00 (0.94-1.06)      | 0.983        | 1.00 (0.94-1.06)      | 0.904        |
|                            | IL-10         | 111.85 (2.86-4377.78) | <b>0.012</b> | 103.97 (2.30-4699.58) | <b>0.017</b> |
|                            | IFN- $\gamma$ | 1.02 (0.97-1.08)      | 0.438        | 1.02 (0.96-1.09)      | 0.447        |
|                            | TNF- $\alpha$ | 1.69 (0.70-4.12)      | 0.246        | 1.78 (0.69-4.62)      | 0.234        |
| Vascular injury            | CRP           | 1.00 (1.00-1.00)      | 0.697        | 1.00 (1.00-1.00)      | 0.713        |

**Table 2:** Odds ratio (OR) for associations between plasma concentrations of inflammatory factors (cytokines (n=4), chemokines (n=6), pro-inflammatory cytokines (n=5), vascular injury (n=1)) in type 2 diabetes with short-term disease duration (<10 years, n=44) and long-term disease duration (>10 years, n=50) unadjusted and adjusted for age and BMI. Boldface font indicates statistical significance (p<0.05).

### 3.3 Inflammatory biomarkers in subgroups of type 2 diabetes

Obesity was significantly associated with concentration of five inflammatory biomarkers (IL-12/IL-23p40, IL-15, IFN- $\gamma$ , MDC, and CRP) (Table 3 – only analytes with p-value below 0.05 shown). When adjusting for

1  
2  
3  
4 HbA1c, sex, and total plasma cholesterol or statin use, IL-12/IL-23p40, IL-15, and CRP remained  
5 statistically significant associated with obesity. HbA1c was significantly associated with eotaxin and IL-  
6 12/IL-23p40 levels after adjusting for confounders, and levels of MDC were associated with sex with lower  
7 levels found in male subjects compared to females. Lower levels of IL-8, IP-10, and MDC were associated  
8 with DPP-4 inhibitor therapy, while higher levels of TNF- $\alpha$  were associated with GLP-1 receptor agonist  
9 therapy. Lastly, SGLT2 inhibitor therapy was associated with lower levels of MDC.  
10  
11  
12  
13  
14  
15  
16  
17  
18  
19  
20  
21  
22  
23  
24  
25  
26  
27  
28  
29  
30  
31  
32  
33  
34  
35  
36  
37  
38  
39  
40  
41  
42  
43  
44  
45  
46  
47  
48  
49  
50  
51  
52  
53  
54  
55  
56  
57  
58  
59  
60

For peer review only



|                                          | UNADJUSTED MODEL |              | ADJUSTED MODEL 1 |              | ADJUSTED MODEL 2 |              |
|------------------------------------------|------------------|--------------|------------------|--------------|------------------|--------------|
|                                          | OR (95% CI)      | p-value      | OR (95% CI)      | p-value      | OR (95% CI)      | p-value      |
| <b>A. Obesity</b>                        |                  |              |                  |              |                  |              |
| IL-12/IL-23p40                           | 1.01 (1.00-1.02) | <b>0.003</b> | 1.01 (1.00-1.02) | <b>0.007</b> | 1.01 (1.00-1.02) | <b>0.007</b> |
| IL-15                                    | 2.32 (1.05-5.11) | <b>0.038</b> | 2.30 (1.02-5.15) | <b>0.043</b> | 2.30 (1.02-5.16) | <b>0.043</b> |
| IFN- $\gamma$                            | 1.12 (1.00-1.25) | <b>0.041</b> | 1.10 (0.99-1.23) | 0.087        | 1.10 (0.99-1.22) | 0.091        |
| MDC                                      | 1.00 (1.00-1.00) | <b>0.029</b> | 1.00 (1.00-1.00) | 0.051        | 1.00 (1.00-1.00) | <b>0.049</b> |
| CRP                                      | 1.00 (1.00-1.00) | <b>0.001</b> | 1.00 (1.00-1.00) | <b>0.001</b> | 1.00 (1.00-1.00) | <b>0.001</b> |
| <b>B. Blood glucose</b>                  |                  |              |                  |              |                  |              |
| IL-8                                     | 1.08 (1.00-1.15) | <b>0.037</b> | 1.07 (0.99-1.14) | 0.076        | 1.07 (1.00-1.15) | 0.055        |
| TNF- $\alpha$                            | 3.25 (1.21-8.73) | <b>0.019</b> | 2.64 (0.95-7.34) | 0.062        | 3.09 (1.11-8.58) | <b>0.031</b> |
| Eotaxin                                  | 1.00 (1.00-1.01) | <b>0.031</b> | 1.00 (1.00-1.01) | <b>0.027</b> | 1.00 (1.00-1.01) | <b>0.025</b> |
| <b>C. Sex</b>                            |                  |              |                  |              |                  |              |
| MDC                                      | 1.00 (1.00-1.00) | <b>0.009</b> | 1.00 (1.00-1.00) | <b>0.021</b> | 1.00 (1.00-1.00) | <b>0.027</b> |
| <b>D. DPP-4 inhibitor therapy</b>        |                  |              |                  |              |                  |              |
| IL-8                                     | 0.88 (0.79-0.99) | <b>0.040</b> | 0.89 (0.79-1.00) | 0.052        | 0.89 (0.79-1.00) | 0.051        |
| IP-10                                    | 1.00 (1.00-1.00) | <b>0.013</b> | 0.99 (0.99-1.00) | <b>0.008</b> | 0.99 (0.99-1.00) | <b>0.008</b> |
| MDC                                      | 1.00 (1.00-1.00) | <b>0.027</b> | 1.00 (1.00-1.00) | <b>0.011</b> | 1.00 (1.00-1.00) | <b>0.011</b> |
| TARC                                     | 1.00 (1.00-1.01) | <b>0.004</b> | 1.00 (1.00-1.01) | <b>0.005</b> | 1.00 (1.00-1.01) | <b>0.005</b> |
| <b>E. GLP-1 receptor agonist therapy</b> |                  |              |                  |              |                  |              |
| IL-8                                     | 1.08 (1.01-1.15) | <b>0.025</b> | 1.08 (0.99-1.17) | 0.069        | 1.08 (1.00-1.18) | 0.058        |

|                                   |                   |              |                   |              |                   |              |
|-----------------------------------|-------------------|--------------|-------------------|--------------|-------------------|--------------|
| IL-15                             | 0.57 (0.23-1.41)  | 0.226        | 0.29 (0.09-0.95)  | <b>0.042</b> | 0.27 (0.08-0.92)  | <b>0.036</b> |
| IL-16                             | 1.00 (0.98-1.00)  | <b>0.042</b> | 1.00 (0.98-1.00)  | 0.077        | 1.00 (0.98-1.00)  | 0.068        |
| TNF- $\alpha$                     | 6.50 (2.07-20.42) | <b>0.001</b> | 4.60 (1.26-16.76) | <b>0.021</b> | 4.70 (1.25-17.69) | <b>0.022</b> |
| <b>F. SGLT2 inhibitor therapy</b> |                   |              |                   |              |                   |              |
| MDC                               | 1.00 (1.00-1.00)  | <b>0.014</b> | 1.00 (1.00-1.00)  | <b>0.027</b> | 1.00 (1.00-1.00)  | <b>0.033</b> |

**Table 3:** Multiple logistic regression analysis of plasma concentrations between A) type 2 diabetes+BMI<30 (n=40) and Type 2 diabetes+BMI>30 (n=58), B) type 2 diabetes with HbA1c<55(n=47) and type 2 diabetes with HbA1c>55 (n=51), C) male type 2 diabetes (n=62) and female type 2 diabetes (n=36), D) type 2 diabetes (n=80) and type 2 diabetes treated with DPP-4 inhibitors (n=18), E) type 2 diabetes (n=75) and type 2 diabetes treated with GLP-1 receptor agonists (n=23), and F) type 2 diabetes (n=75) and type 2 diabetes treated with SGLT2 inhibitor therapy (n=23) with overall R-squared value and effect size (95% CI) of BMI, HbA1c, sex, DPP-4 inhibitor therapy, GLP-1 receptor agonist therapy, or SGLT2 inhibitor therapy displayed. Results presented as odds ratio (OR) and 95% confidence interval (CI). Total plasma cholesterol, BMI, HbA1c, and sex were included in the adjusted model 1 as appropriate, while statin use, BMI, HbA1c, and sex were included in the adjusted model 2 as appropriate. For simplicity, only analytes with p-values below 0.05 in either model are shown. Bold font indicated statistical significance after Bonferroni adjustment (p<0.003).

1  
2  
3  
4  
5  
6  
7  
8  
9  
10  
11  
12  
13  
14  
15  
16  
17  
18  
19  
20  
21  
22  
23  
24  
25  
26  
27  
28  
29  
30  
31  
32  
33  
34  
35  
36  
37  
38  
39  
40  
41  
42  
43  
44  
45  
46  
47  
48  
49  
50  
51  
52  
53  
54  
55  
56  
57  
58  
59  
60

### 3.4 Diabetic comorbidities

When subdividing the type 2 diabetes cohort into groups according to number of diabetic comorbidities, five biomarkers (IL-6, IL-10, IL12/IL-23p40, IL-15, and CRP) were significantly elevated in participants with three or more comorbidities compared to those with fewer or none (Figure 2 – only analytes with p-values below 0.05 shown).

## 4 DISCUSSION

In this study, we investigated the level of systemic low-grade inflammation in a cohort of individuals diagnosed with type 2 diabetes. Elevated levels of several inflammatory biomarkers were found in comparison to healthy controls, evident in both short- and long-term disease duration. Moreover, in the type 2 diabetes cohort, obesity, hyperglycemia and female sex were found to be associated with elevated levels of various inflammatory biomarkers. Lastly, we were able to establish a connection between the number of common diabetic comorbidities and elevated levels of inflammatory biomarkers.

### 4.1 Inflammatory biomarkers in type 2 diabetes compared to healthy

After adjustment for age and BMI, we showed that IL-7 was significantly decreased, while eotaxin and TNF- $\alpha$  was significantly increased in type 2 diabetes compared to healthy. The majority of research regarding IL-7 has been conducted in type 1 diabetes, where elevated levels are shown compared to healthy (17). IL-7 is highly involved in T cell function and proliferation, and a role of this cytokine in mediating expansion of insulin-producing  $\beta$ -cell-autoreactive T cells have been proposed thus implicating IL-7 in the pathogenesis of type 1 diabetes (18). The decreased levels in type 2 diabetes compared to healthy controls found in this study were somewhat surprising but may reflect the lack of T-cell activation the pathology of type 2 diabetes. Eotaxin has been linked to the development of atherosclerosis by facilitating monocyte infiltration in smooth muscle cells under the influence of proinflammatory mediators (19), and elevated levels of this chemokine have previously been reported in type 1 diabetes individuals with complications compared to individuals with no diabetic complications as well as healthy controls (20). Increased levels of CRP have previously been reported in adults with type 2 diabetes (13,21), but in our cohorts, the difference could be attributed to a skewed distribution of age and BMI in the two cohorts.

IL-10 is generally regarded as an anti-inflammatory cytokine with the ability to dampen the immune response, and previous data have shown downregulation of IL-10 in both type 2 diabetes and obesity *per se* (22). This contrasts our findings, which showed no differences in the overall diabetes cohort but an increase in individuals with long disease duration. This observation could reflect manifestations of compensatory mechanisms toward a long-term elevated inflammatory environment attempting to elicit an anti-inflammatory response. However, pro-inflammatory factors (e.g. TNF- $\alpha$ ) were elevated regardless of disease duration suggesting that any attempt of balancing the immune response remain challenging in the presence of type 2 diabetes.

## 4.2 Inflammatory biomarkers in subgroups of type 2 diabetes

### *Obesity and blood glucose regulation*

In our type 2 diabetes cohort, obesity (BMI>30) was significantly associated with the levels of IL-12/IL-23p40 and CRP, while eotaxin and TNF- $\alpha$  levels were associated with glycaemic regulation (HbA1c). Previously it has been shown that TNF- $\alpha$  release is upregulated in connection with obesity and has been linked to the progression of insulin resistance (23,24). The fact that TNF- $\alpha$  was not associated with obesity in our cohort is thus surprising. However, elevated levels of TNF- $\alpha$  in adipose tissue, but not in plasma have previously been reported (25), which could also be the case in our cohort. In animal models, TNF- $\alpha$  antagonist treatment improves insulin resistance in obesity (26). A clinical study, however, failed to show the same effect in humans (27). Regarding eotaxin, this chemokine has been linked to the development of cardiovascular disease, which is likewise a complication to long-term hyperglycemia, and our findings of increased levels in dysregulated individuals could therefore be a possible sign of atherosclerosis (19).

### *Sex*

We showed that the level of the chemokine MDC was associated with sex with higher levels seen in females compared to males. Different obesity-related inflammatory pathways between men and women with metabolic syndrome have previously been shown. Increased levels of pro-inflammatory mediators seem to facilitate low-grade systemic inflammation in males, while an insufficient anti-inflammatory milieu appears to be dominant in females (28). These findings suggest that any inflammation-modulating therapy in obesity should be differentiated according to sex and underlying mechanisms. In our type 2 diabetes cohort, however, this pattern was not recreated, indicating that the crucial factor may be aspects related to the metabolic syndrome rather than hyperglycemia.

### *Therapeutical management*

Lower levels of three chemokines (IL-8, IP-10 and MDC) were all associated with DPP-4 inhibitor therapy. DPP-4 inhibitor therapy is known to improve glycaemic control via prevention of breakdown of the incretin hormone GLP-1. In addition, several cytokines and chemokines are also substrates of the DPP-4 enzyme, and DPP-4 inhibitor therapy thus possesses immunomodulating properties possibly facilitating low-grade systemic inflammation in diabetes (9). Potentially this could explain why promising *in vitro* anti-inflammatory actions of DPP-4 inhibitors have failed to show convincingly results in humans (29). Surprisingly, we found lower levels of three DPP-4 substrates (IL-8, IP-10, and MDC) in connection with DPP-4 inhibitor therapy. Though seemingly in contrast with the expected result, similar observations have previously been reported (30), underlining the need for further research in the immunomodulating effects of DPP-4 inhibitor therapy.

1  
2  
3  
4 GLP-1 receptor agonist therapy, which share the same pharmacodynamic endpoint as DPP-4 inhibitor  
5 therapy, is known to possess anti-inflammatory properties independent of improved glycaemic control (31).  
6 However, our results showed an approximately 25% increase in proinflammatory TNF- $\alpha$  levels in connection  
7 with GLP-1 receptor agonist therapy. This finding is unexpected and in contrast with a previous pilot study  
8 showing that liraglutide significantly decreased TNF- $\alpha$  levels in a type 2 diabetes cohort (32). Preclinical  
9 studies have likewise shown inhibitory effects of liraglutide on TNF- $\alpha$  expression (33). Other preclinical  
10 studies, however, have reported decreased proinflammatory effects of TNF- $\alpha$  through inhibition of the NK-  
11  $\kappa$ B pathway after GLP-1 receptor agonist therapy (34). If this is the case, this would neutralize the  
12 proinflammatory pathways caused by increased TNF- $\alpha$  levels seen in this study.  
13  
14  
15  
16  
17  
18  
19

20 In our cohort, SGLT2 inhibitor therapy was associated with a decrease in MDC, known to facilitate and  
21 amplify type II immune response (35). The anti-diabetic effects of SGLT2 inhibitors rely on the inhibition of  
22 renal reabsorption of glucose, but anti-inflammatory effects have also been reported including attenuation of  
23 IL-6 production (36) and modulation of macrophage polarization (37). The prospect of utilizing the anti-  
24 inflammatory potential of SGLT2 inhibitors in various pathologies is currently receiving much attention  
25 (38).  
26  
27  
28  
29

### 30 31 *Additional subgroups*

32 Apart from obesity, hyperglycemia, and sex, other factors such as current smoking status and specific  
33 medical therapy may likewise influence the level of inflammation in type 2 diabetes (39,40). In our cohort  
34 only 5% were smokers, which is surprisingly low, given the fact that smoking is a substantial risk factor for  
35 development of type 2 diabetes (39). The low number of current smokers may reflect selection or reporting  
36 bias or perhaps successful free smoking cessation programs, as 40% of our participants reported to be  
37 previous smokers. This is, however, highly speculative. Nonetheless, the degree of a persistent pro-  
38 inflammatory effect of nicotine following smoking cessation is debated (41), and could potentially be  
39 influencing the results in the current study. Moreover, the high proportion of previous smokers could indicate  
40 that our cohort consisted of individuals with a high degree of determination and self-efficacy. Such selection  
41 bias is potentially also reflected in the median HbA1c of 55 mmol/mol, which is lower in comparison to  
42 other cohorts (13,42).  
43  
44  
45  
46  
47  
48  
49

50 In our cohort, 66% received lipid-lowering statin therapy, which is known to possess anti-inflammatory  
51 properties (8), which again could impact the level of investigated inflammatory biomarkers. Consequently,  
52 the reported elevated levels of several biomarkers compared to the healthy control cohort could be artificially  
53 low due to the anti-inflammatory effect of statins. Potentially this could explain why no pro-inflammatory  
54 biomarkers were increased in individuals with longer disease duration as these individuals were more likely  
55 to be on statin therapy.  
56  
57  
58  
59  
60

### 4.3 Diabetic comorbidities

It has previously been established that low-grade systemic inflammation plays a role in progression of diabetic complications (10–12). We found that IL-6, IL-10, IL-12/IL-23p40, IL-15, and CRP were elevated in individuals with multiple diabetic comorbidities compared to those with fewer or none. In the literature, IL-6 elevation has in particular been associated with diabetic complications (43–46). Likewise, increased levels of CRP has previously been linked to development and severity of diabetic complications (44,47). In addition, the observed elevated levels of IL-10 were primarily found in subjects with longer disease duration, which could reflect that diabetes comorbidities typically become more prevalent with increasing exposure to glycemic fluctuations and disease duration (48). Furthermore, IL-12 has previously been shown to be involved in the pathogenesis of several diabetic micro- and macrovascular comorbidities (49). Interestingly, a study in obese and insulin resistant IL-12 knockout mice showed that IL-12 disruption increased angiogenesis and restored peripheral blood flow perfusion through attenuation of oxidative stress and increased levels of angiogenic factors (50). In humans, a monoclonal antibody (Ustekinumab) targeting IL-12/IL-23p40 is currently used as a safe and effective treatment of psoriasis (51). Our data raise the intriguing possibility of applying this drug as a novel treatment option for diabetic micro- and macrovascular complications but needs to be investigated in future randomized controlled trials. Finally, circulating levels of IL-15 have been shown to be influenced by fat mass and physical activity (52). Furthermore, IL-15 improve lipid deposition and insulin sensitivity by activation of the GLUT-4 transporter in skeletal muscles. Hence, IL-15 has been proposed as a novel therapeutic option for treating obesity and type 2 diabetes (53). The increased levels of IL-15 in individuals with three or more comorbidities found in this study seem to contradict the beneficial effects normally attributed to this cytokine, but as this is a cross-sectional study no conclusions of causality can be made.

### 4.4 Strengths and limitations

A major limitation of this study is the cross-sectional study design, which hinders any assumptions of the predictive potential of low-grade inflammation and clinical characteristics of type 2 diabetes. On this dataset, we tested for association between low grade inflammation in type 2 diabetes, and we selected *a priori* the anti-inflammatory markers, as they are part of the underlying pathogenesis. According to the study design, each of the serum markers were tested individually, and based on our unadjusted and adjusted models we suggest an association to the specific marker IL-10. As the manufacturer of the multiplex assay had defined division of serum markers into cytokines (n=4), chemokines (n=6), pro-inflammatory cytokines (n=5), vascular injury (n=1), we believe that Bonferroni's correction is too conservative. The major strength of this study is the high degree of heterogeneity of our cohort, obtained by systematically screening all people in our out-patient diabetes clinic, thereby facilitating generalization to the larger population of type 2 diabetes. However, selection bias in which individuals with low symptom burdens are more likely to participate cannot be ruled out. Contrary, a majority of patients with complications, who regard participation

1  
2  
3  
4 in a clinical trial as a possibility to receive extra attention from health care professionals, is likewise  
5 conceivable. It should also be noted that because this study is based on secondary analyses, the inclusion and  
6 exclusion criteria were not designed to exclude participants with comorbidities or medication use, which  
7 could impact the levels of the investigated inflammatory factors. Lastly, registration of retinopathy was  
8 restricted to participant recollection and reporting. Objective measures or consultation in patient records  
9 would have improved the validity of this outcome.  
10  
11  
12  
13

#### 14 **4.5 Conclusion**

15 We showed that individuals with type 2 diabetes exhibit higher degrees of various inflammatory factors in  
16 plasma, and that obesity and glycemic dysregulation are associated with the level of specific inflammatory  
17 factors. Furthermore, a considerable increase in several inflammatory factors was seen in people with  
18 multiple diabetic comorbidities. Regarding medication, DPP-4 inhibitor therapy was associated with  
19 decreased levels of several chemokines, while increased TNF- $\alpha$  levels were observed in association with  
20 GLP-1 receptor agonist therapy. Taken together, our results show that individuals with type 2 diabetes have  
21 systemic low-grade inflammation. Although the cross-sectional nature of our study hinders the ability to look  
22 at the causality between systemic low-grade inflammation and diabetic complications, it is intriguing to  
23 speculate whether dampening of the inflammatory state could protect against development of comorbidities  
24 in type 2 diabetes.  
25  
26  
27  
28  
29  
30  
31  
32  
33  
34

#### 35 **ACKNOWLEDGEMENTS**

36 We are grateful to Lene Holm Fruensgaard Pedersen for assistance in blood sample collection, and to Nina  
37 Wittorff Jensen, Rebekka Hanne Gerwig and Charlotte Gade Farcinsen Leth for expert technical assistance.  
38  
39  
40

#### 41 **AUTHOR CONTRIBUTIONS**

42 Study design and original idea by CB and BB. AMW collected the data. TO, AMW, FP, BB, JS, and CB  
43 analysed and interpreted the data. TO wrote the first draft, but all authors contributed to the final manuscript.  
44 CB are the guarantor of the work, has full access to the data in the study and takes responsibility for the  
45 integrity of the data and the accuracy of the data analysis. The data that support the findings of this study are  
46 available from the corresponding author upon reasonable request.  
47  
48  
49  
50  
51  
52

#### 53 **COMPETING INTERESTS**

54 None  
55  
56  
57  
58  
59  
60

## FUNDING

CB received funding from the Talent Management Program, Aalborg University. AMW received funding from The Research Foundation of Health Science, Region of Northern Jutland. No funding source had any role in study design, data collection, data analysis, data interpretation, or the preparation of this article.

## DATA SHARING STATEMENT

Deidentified participant data are available upon reasonable request to the corresponding author.

## ETHICS APPROVAL

The protocol was approved by The North Denmark Region Committee on Health Research Ethics, Denmark (N-20170045)

## REFERENCES

1. Ighodaro OM. Molecular pathways associated with oxidative stress in diabetes mellitus. Vol. 108, *Biomedicine and Pharmacotherapy*. Elsevier Masson SAS; 2018. p. 656–62.
2. Federation ID. IDF Diabetes Atlas, 9th edn. Brussels [Internet]. 2019. Available from: <https://www.diabetesatlas.org>
3. Prasad M, Chen EW, Toh SA, et al. Autoimmune responses and inflammation in type 2 diabetes. Vol. 107, *Journal of Leukocyte Biology*. John Wiley and Sons Inc; 2020. p. 739–48.
4. Gonzalez AC de O, Costa TF, Andrade Z de A, et al. Wound healing - A literature review. *An Bras Dermatol*. 2016 Oct;91(5):614–20.
5. Gonzalez LL, Garrie K, Turner MD. Type 2 diabetes – An autoinflammatory disease driven by metabolic stress. Vol. 1864, *Biochimica et Biophysica Acta - Molecular Basis of Disease*. Elsevier B.V.; 2018. p. 3805–23.
6. Pradhan AD, Manson JE, Rifai N, et al. C-reactive protein, interleukin 6, and risk of developing type 2 diabetes mellitus. *J Am Med Assoc*. 2001 Jul 18;286(3):327–34.
7. Thorand B, Löwel H, Schneider A, et al. C-reactive protein as a predictor for incident diabetes mellitus among middle-aged men: Results from the MONICA Augsburg Cohort Study, 1984-1998. *Arch Intern Med*. 2003 Jan 13;163(1):93–9.



1  
2  
3  
4  
5  
6  
7  
8  
9  
10  
11  
12  
13  
14  
15  
16  
17  
18  
19  
20  
21  
22  
23  
24  
25  
26  
27  
28  
29  
30  
31  
32  
33  
34  
35  
36  
37  
38  
39  
40  
41  
42  
43  
44  
45  
46  
47  
48  
49  
50  
51  
52  
53  
54  
55  
56  
57  
58  
59  
60

8. Albert MA, Danielson E, Rifai N, et al. Effect of statin therapy on C-reactive protein levels: The pravastatin inflammation/CRP evaluation (PRINCE): A randomized trial and cohort study. *J Am Med Assoc.* 2001 Jul 4;286(1):64–70.
9. Shao S, Xu QQ, Yu X, et al. Dipeptidyl peptidase 4 inhibitors and their potential immune modulatory functions. *Pharmacol Ther.* 2020 May 1;209:107503.
10. Shao B-Y, Zhang S-F, Li H-D, et al. Epigenetics and Inflammation in Diabetic Nephropathy. *Front Physiol.* 2021 May 5;12.
11. Pop-Busui R, Boulton AJM, Feldman EL, et al. Diabetic Neuropathy: A Position Statement by the American Diabetes Association. *Diabetes Care.* 2017 Jan 20;40(1):136–54.
12. Nebbioso M, Lambiase A, Armentano M, et al. Diabetic retinopathy, oxidative stress, and sirtuins: an in depth look in enzymatic patterns and new therapeutic horizons. *Survey of Ophthalmology.* Elsevier Inc.; 2021.
13. Alexandraki KI, Piperi C, Ziakas PD, et al. Cytokine secretion in long-standing diabetes mellitus type 1 and 2: Associations with low-grade systemic inflammation. *J Clin Immunol.* 2008 Jul;28(4):314–21.
14. Maser RE, Mitchell BD, Vinik AI, et al. The Association Between Cardiovascular Autonomic Neuropathy and Mortality in Individuals With Diabetes: A meta-analysis. *Diabetes Care.* 2003 Jun 1;26(6):1895–901.
15. Wegeberg AM, Lunde ED, Riahi S, et al. Cardiac vagal tone as a novel screening tool to recognize asymptomatic cardiovascular autonomic neuropathy: Aspects of utility in type 1 diabetes. *Diabetes Res Clin Pract.* 2020 Dec 1;170.
16. Croghan CW, Egeghy PP. Methods of Dealing With Values Below the Limit of Detection Using Sas. *South SAS User Gr.* 2003;5.
17. Coulson DJ, Bakhshab S, Latief JS, et al. MiR-126, IL-7, CXCR1/2 receptors, inflammation and circulating endothelial progenitor cells: The study on targets for treatment pathways in a model of subclinical cardiovascular disease (type 1 diabetes mellitus). *J Transl Med.* 2021 Dec 1;19(1).
18. Monti P, Bonifacio E. Interleukin-7 and Type 1 Diabetes. *Curr Diab Rep.* 2014 Sep 5;14(9):518.
19. Wang Y, Luk AOY, Ma RCW, et al. Independent predictive roles of eotaxin Ala23Thr, paraoxonase 2 Ser311Cys and  $\beta$ 3-adrenergic receptor Trp64Arg polymorphisms on cardiac disease in Type 2 Diabetes - An 8-year prospective cohort analysis of 1297 patients. *Diabet Med.* 2010;27(4):376–83.

- 1
- 2
- 3
- 4 20. Jamali Z, Nazari M, Khoramdelazad H, et al. Expression of CC chemokines CCL2, CCL5, and
- 5 CCL11 is associated with duration of disease and complications in type-1 diabetes: A study on
- 6 Iranian diabetic patients. *Clin Lab*. 2013;59(9–10):993–1001.
- 7
- 8
- 9 21. Malik A, Morya RK, Saha S, et al. Oxidative stress and inflammatory markers in type 2 diabetic
- 10 patients. *Eur J Clin Invest*. 2020 Jun 1;50(6).
- 11
- 12 22. Van Exel E, Gussekloo J, De Craen AJM, et al. Low production capacity of interleukin-10 associates
- 13 with the metabolic syndrome and type 2 diabetes: The Leiden 85-plus study. *Diabetes*. 2002 Apr
- 14 1;51(4):1088–92.
- 15
- 16 23. Hauner H, Bender M, Haastert B, et al. Plasma concentrations of soluble TNF-alpha receptors in
- 17 obese subjects. *Int J Obes*. 1998;22(12):1239–43.
- 18
- 19 24. Ruan H, Lodish HF. Insulin resistance in adipose tissue: Direct and indirect effects of tumor necrosis
- 20 factor- $\alpha$ . Vol. 14, *Cytokine and Growth Factor Reviews*. Elsevier BV; 2003. p. 447–55.
- 21
- 22 25. Hotamisligil GS, Arner P, Caro JF, et al. Increased adipose tissue expression of tumor necrosis factor-
- 23  $\alpha$  in human obesity and insulin resistance. *J Clin Invest*. 1995 May 1;95(5):2409–15.
- 24
- 25 26. Uysal KT, Wiesbrock SM, Marino MW, et al. Protection from obesity-induced insulin resistance in
- 26 mice lacking TNF-  $\alpha$  function. *Nature*. 1997;389(6651):610–4.
- 27
- 28 27. Bernstein LE, Berry J, Kim S, et al. Effects of etanercept in patients with the metabolic syndrome.
- 29 *Arch Intern Med*. 2006 Apr 24;166(8):902–8.
- 30
- 31 28. Ter Horst R, Van Den Munckhof ICL, Schraa K, et al. Sex-Specific Regulation of Inflammation and
- 32 Metabolic Syndrome in Obesity. *Arterioscler Thromb Vasc Biol*. 2020;40(7):1787–800.
- 33
- 34 29. Teragawa H, Morimoto T, Fujii Y, et al. Effect of Anagliptin versus Sitagliptin on Inflammatory
- 35 Markers: Sub-Analysis from the REASON Trial. 2020;
- 36
- 37 30. Aso Y, Kase M, Sagara M, et al. Tenueligliptin, a DPP-4 Inhibitor, Decreases Plasma Levels of
- 38 Inflammatory Chemokines During a Standard Meal Test in Patients With Type 2 Diabetes. *Am J Med*
- 39 *Sci*. 2020 Sep 1;360(3):261–7.
- 40
- 41 31. Bray JJH, Foster-Davies H, Salem A, et al.  $\text{Glucagon-like peptide-1 receptor agonists}$
- 42 improve biomarkers of inflammation and oxidative stress: A systematic review and meta-analysis of
- 43 randomised controlled trials. *Diabetes, Obes Metab*. 2021 Aug 6;23(8):1806–22.
- 44
- 45 32. Savchenko LG, Digtiar NI, Selikhova LG, et al. Liraglutide exerts an anti-inflammatory action in
- 46 obese patients with type 2 diabetes. *Rom J Intern Med*. 2019 Sep 1;57(3):233–40.
- 47
- 48
- 49
- 50
- 51
- 52
- 53
- 54
- 55
- 56
- 57
- 58
- 59
- 60

1  
2  
3  
4  
5  
6  
7  
8  
9  
10  
11  
12  
13  
14  
15  
16  
17  
18  
19  
20  
21  
22  
23  
24  
25  
26  
27  
28  
29  
30  
31  
32  
33  
34  
35  
36  
37  
38  
39  
40  
41  
42  
43  
44  
45  
46  
47  
48  
49  
50  
51  
52  
53  
54  
55  
56  
57  
58  
59  
60

33. Zhang J, Yi T, Cheng S, et al. Glucagon-like peptide-1 receptor agonist Exendin-4 improves neurological outcomes by attenuating TBI- induced inflammatory responses and MAPK activation in rats. *Int Immunopharmacol*. 2020 Sep 1;86:106715.
34. Liu Y-T, He T, Li H-Q, et al. Liraglutide improves pancreatic islet  $\beta$  cell apoptosis in rats with type 2 diabetes mellitus by inhibiting the IKK $\epsilon$ /NF- $\kappa$ B pathway. *Eur Rev Med Pharmacol Sci*. 2021 Jul;25(14):4818–28.
35. Mantovani A, Gray PA, Damme J Van, et al. Macrophage-derived chemokine (MDC). *J Leukoc Biol*. 2000 Sep 1;68(3):400–4.
36. Latva-Rasku A, Honka MJ, Kullberg J, et al. The SGLT2 Inhibitor Dapagliflozin Reduces Liver Fat but Does Not Affect Tissue Insulin Sensitivity: A Randomized, Double-Blind, Placebo-Controlled Study With 8-Week Treatment in Type 2 Diabetes Patients. *Diabetes Care*. 2019 May 1;42(5):931–7.
37. Xu L, Ota T. Emerging roles of SGLT2 inhibitors in obesity and insulin resistance: Focus on fat browning and macrophage polarization. 2018;
38. Feijóo-Bandín S, Aragón-Herrera A, Otero-Santiago M, et al. Role of Sodium-Glucose Co-Transporter 2 Inhibitors in the Regulation of Inflammatory Processes in Animal Models. 2022;
39. Chang SA. Smoking and type 2 diabetes mellitus. Vol. 36, *Diabetes and Metabolism Journal*. Korean Diabetes Association; 2012. p. 399–403.
40. Salazar JJ, Ennis WJ, Koh TJ. Diabetes medications: Impact on inflammation and wound healing. Vol. 30, *Journal of Diabetes and its Complications*. Elsevier Inc.; 2016. p. 746–52.
41. Yanbaeva DG, Dentener MA, Creutzberg EC, et al. Systemic effects of smoking. *Chest*. 2007 May 1;131(5):1557–66.
42. Amin K, Qadr SH, Hassan Hussein R, et al. Levels of cytokines and GADA in type I and II diabetic patients. *Prim Care Diabetes*. 2020 Feb 1;14(1):61–7.
43. Yao Y, Li R, Du J, et al. Interleukin-6 and Diabetic Retinopathy: A Systematic Review and Meta-Analysis. *Curr Eye Res*. 2019 May 4;44(5):564–74.
44. Shelbaya S, Amer H, Seddik S, et al. Study of the role of interleukin-6 and highly sensitive C-reactive protein in diabetic nephropathy in type 1 diabetic patients. Vol. 16, *European Review for Medical and Pharmacological Sciences*. *Eur Rev Med Pharmacol Sci*; 2012. p. 176–82.
45. Herder C, Bongaerts BWC, Rathmann W, et al. Association of subclinical inflammation with polyneuropathy in the older population: KORA F4 study. *Diabetes Care*. 2013 Nov;36(11):3663–70.

- 1  
2  
3  
4 46. González-Clemente JM, Vilardell C, Broch M, et al. Lower heart rate variability is associated with  
5 higher plasma concentrations of IL-6 in type 1 diabetes. *Eur J Endocrinol.* 2007 Jul;157(1):31–8.  
6  
7  
8 47. Aryan Z, Ghajar A, Faghihi-Kashani S, et al. Baseline High-Sensitivity C-Reactive Protein Predicts  
9 Macrovascular and Microvascular Complications of Type 2 Diabetes: A Population-Based Study.  
10 *Ann Nutr Metab.* 2018 May 1;72(4):287–95.  
11  
12  
13 48. Pop-Busui R, Boulton AJM, Feldman EL, et al. Diabetic neuropathy: A position statement by the  
14 American diabetes association. *Diabetes Care.* 2017 Jan 1;40(1):136–54.  
15  
16  
17 49. Mishra M, Kumar H, Bajpai S, et al. Level of serum IL-12 and its correlation with endothelial  
18 dysfunction, insulin resistance, proinflammatory cytokines and lipid profile in newly diagnosed type  
19 2 diabetes. *Diabetes Res Clin Pract.* 2011 Nov;94(2):255–61.  
20  
21  
22  
23 50. Ali M, Mali V, Haddox S, et al. Essential Role of IL-12 in Angiogenesis in Type 2 Diabetes. *Am J*  
24 *Pathol.* 2017 Nov 1;187(11):2590–601.  
25  
26  
27 51. Marwaha AK, Tan S, Dutz JP. Targeting the IL-17/IFN- $\gamma$  axis as a potential new clinical therapy for  
28 type 1 diabetes. Vol. 154, *Clinical Immunology.* Academic Press Inc.; 2014. p. 84–9.  
29  
30  
31 52. Pérez-López A, Valadés D, Vázquez Martínez C, et al. Serum IL-15 and IL-15R $\alpha$  levels are  
32 decreased in lean and obese physically active humans. *Scand J Med Sci Sport.* 2018 Mar  
33 1;28(3):1113–20.  
34  
35  
36 53. Duan Y, Li F, Wang W, et al. Interleukin-15 in obesity and metabolic dysfunction: current  
37 understanding and future perspectives. Vol. 18, *Obesity Reviews.* Blackwell Publishing Ltd; 2017. p.  
38 1147–58.  
39  
40  
41  
42  
43  
44  
45  
46  
47  
48  
49  
50  
51  
52  
53  
54  
55  
56  
57  
58  
59  
60

1  
2  
3  
4  
5  
6  
7  
8  
9  
10  
11  
12  
13  
14  
15  
16  
17  
18  
19  
20  
21  
22  
23  
24  
25  
26  
27  
28  
29  
30  
31  
32  
33  
34  
35  
36  
37  
38  
39  
40  
41  
42  
43  
44  
45  
46  
47  
48  
49  
50  
51  
52  
53  
54  
55  
56  
57  
58  
59  
60

## FIGURE LEGENDS

**Figure 1:** Volcano plot displaying pairwise comparisons of inflammatory factors in type 2 diabetes and healthy controls. Vertical dashed lines indicate threshold for two-fold differences among groups. Horizontal dashed lines indicate p-value thresholds of 0.05, 0.01, and 0.001, respectively. ● significantly different after adjustment for age and BMI, ◐ significantly different in the unadjusted model, ○ above significance threshold in both models. Only significant analytes are labeled.

**Figure 2:** Box plots displaying plasma concentrations of biomarkers in individuals with type 2 diabetes and 0 (n=20), 1 (n=43), 2 (n=28), or 3 or more (n=7) diabetic comorbidities (retinopathy, nephropathy, neuropathy, cardiac autonomic neuropathy). Only analytes with p-values below 0.05 are shown. \*p<0.05, \*\*p<0.01

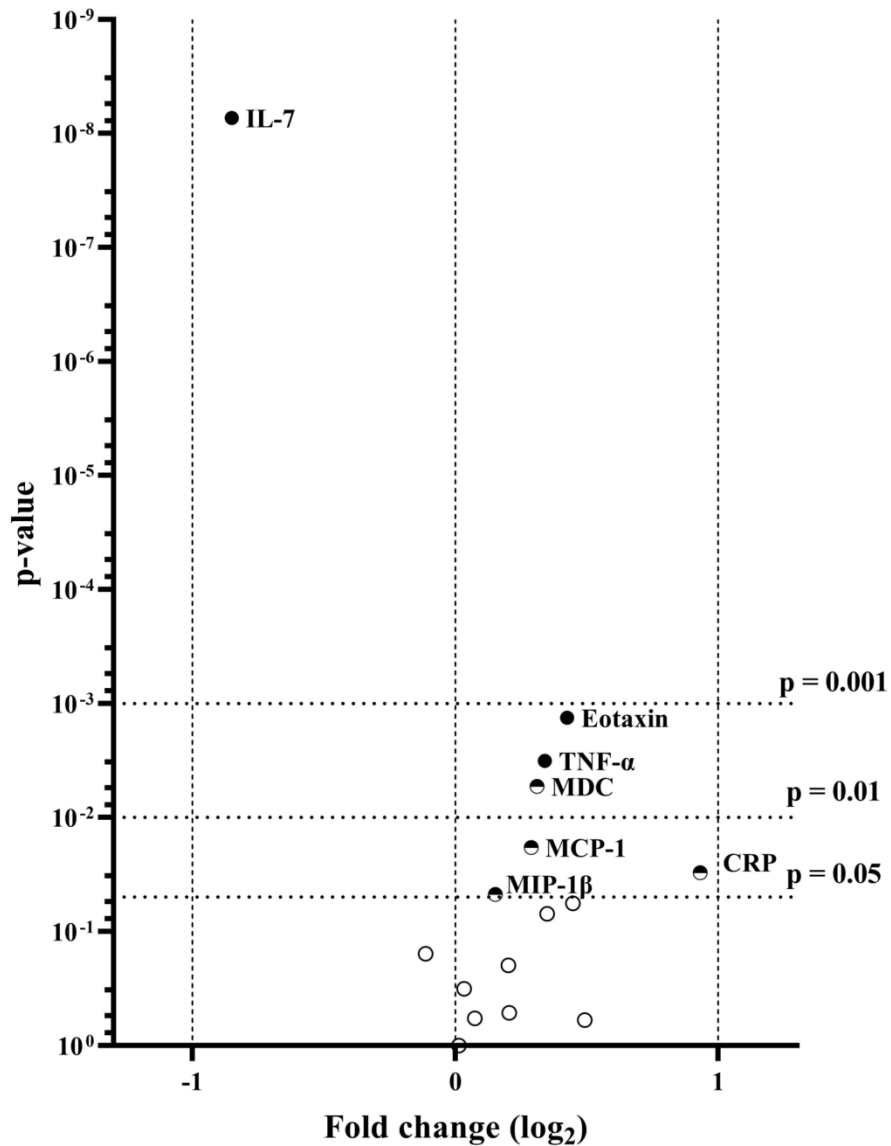

Volcano plot displaying pairwise comparisons of inflammatory factors in type 2 diabetes and healthy controls. Vertical dashed lines indicate threshold for two-fold differences among groups. Horizontal dashed lines indicate p-value thresholds of 0.05, 0.01, and 0.001, respectively. ● significantly different after adjustment for age and BMI, ○ significantly different in the unadjusted model, ○ above significance threshold in both models. Only significant analytes are labeled.

136x175mm (300 x 300 DPI)



Box plots displaying plasma concentrations of biomarkers in individuals with type 2 diabetes and 0 (n=20), 1 (n=43), 2 (n=28), or 3 or more (n=7) diabetic comorbidities (retinopathy, nephropathy, neuropathy, cardiac autonomic neuropathy). Only analytes with p-values below 0.05 are shown. \*p<0.05, \*\*p<0.01

301x342mm (150 x 150 DPI)

## SUPPLEMENTARY TABLES

|                                | % of samples with estimated values†<br>(T2D/healthy) | % of excluded samples‡<br>(T2D/healthy) | Number of readings above 3 SD from group mean<br>(T2D/healthy) |
|--------------------------------|------------------------------------------------------|-----------------------------------------|----------------------------------------------------------------|
| IL-1 $\alpha$ §                | 95/95                                                | 3/5                                     | -                                                              |
| IL-1 $\beta$ §                 | 93/95                                                | 3/0                                     | -                                                              |
| IL-2§                          | 19/29                                                | 30/29                                   | -                                                              |
| IL-4§                          | 14/14                                                | 51/43                                   | -                                                              |
| IL-5§                          | 32/19                                                | 23/14                                   | -                                                              |
| <b>IL-6</b>                    | <b>0/0</b>                                           | <b>0/0</b>                              | <b>2/0</b>                                                     |
| <b>IL-7</b>                    | <b>0/0</b>                                           | <b>1/0</b>                              | <b>1/0</b>                                                     |
| <b>IL-8</b>                    | <b>0/0</b>                                           | <b>0/0</b>                              | <b>2/0</b>                                                     |
| <b>IL-10</b>                   | <b>0/0</b>                                           | <b>0/0</b>                              | <b>1/0</b>                                                     |
| <b>IL-12/IL-23p40</b>          | <b>0/0</b>                                           | <b>0/0</b>                              | <b>1/0</b>                                                     |
| IL-13§                         | 82/100                                               | 10/0                                    | -                                                              |
| <b>IL-15</b>                   | <b>0/0</b>                                           | <b>1/0</b>                              | <b>2/0</b>                                                     |
| <b>IL-16</b>                   | <b>0/0</b>                                           | <b>1/0</b>                              | <b>1/0</b>                                                     |
| IL-17A§                        | 0/0                                                  | 17/19                                   | -                                                              |
| <b>IFN-<math>\gamma</math></b> | <b>0/0</b>                                           | <b>0/0</b>                              | <b>2/0</b>                                                     |
| <b>TNF-<math>\alpha</math></b> | <b>0/0</b>                                           | <b>0/0</b>                              | <b>2/0</b>                                                     |
| TNF- $\beta$ §                 | 21/5                                                 | 33/19                                   | -                                                              |
| <b>Eotaxin</b>                 | <b>0/0</b>                                           | <b>1/0</b>                              | <b>0/0</b>                                                     |
| Eotaxin-3§                     | 0/0                                                  | 15/10                                   | -                                                              |
| <b>IP-10</b>                   | <b>0/0</b>                                           | <b>1/0</b>                              | <b>3/0</b>                                                     |
| <b>MCP-1</b>                   | <b>0/0</b>                                           | <b>1/0</b>                              | <b>0/0</b>                                                     |
| MCP-4§                         | 0/0                                                  | 1/10                                    | -                                                              |
| <b>MDC</b>                     | <b>0/0</b>                                           | <b>1/0</b>                              | <b>1/0</b>                                                     |
| MIP-1 $\alpha$ §               | 0/0                                                  | 10/5                                    | -                                                              |
| <b>MIP-1<math>\beta</math></b> | <b>0/0</b>                                           | <b>1/5</b>                              | <b>2/0</b>                                                     |
| <b>TARC</b>                    | <b>0/0</b>                                           | <b>1/0</b>                              | <b>2/0</b>                                                     |
| <b>CRP</b>                     | <b>0/0</b>                                           | <b>0/0</b>                              | <b>3/1</b>                                                     |

**Supplementary table 1:** Overview of MSD multiplex analysis and data handling. † calculated as the lower detection limit divided by the square root of two, ‡ excluded due to a coefficient of variance above 30%



between duplicates, § excluded from further analysis due to insufficient data quality. Boldface font indicates analytes included in the analysis.

|                       | <b>Healthy</b><br>(n=21) | <b>Type 2 diabetes</b><br>(n=98) | <b>p-value</b>   |
|-----------------------|--------------------------|----------------------------------|------------------|
| <b>IL-6</b>           | 0.6 (0.4-0.9)            | 0.9 (0.6-1.3)                    | 0.056            |
| <b>IL-7</b>           | 15.5 ± 5.0               | 8.2 (5.9-10.2)                   | <b>&lt;0.001</b> |
| <b>IL-8</b>           | 12.1 ± 3.8               | 12.4 (8.8-16.7)                  | 0.514            |
| <b>IL-10</b>          | 0.2 (0.2-0.3)            | 0.3 (0.2-0.4)                    | 0.198            |
| <b>IL-12/IL-23p40</b> | 100.9 ± 45.5             | 107.5 (82.9-145.8)               | 0.070            |
| <b>IL-15</b>          | 2.7 ± 0.4                | 2.6 (2.3-3.0)                    | 0.999            |
| <b>IL-16</b>          | 225.0 ± 53.9             | 208.0 ± 48.4                     | 0.156            |
| <b>IFN-γ</b>          | 5.1 ± 2.4                | 5.2 (3.1-7.7)                    | 0.594            |
| <b>TNF-α</b>          | 1.2 ± 0.2                | 1.5 (1.3-1.8)                    | <b>0.003</b>     |
| <b>Eotaxin</b>        | 267.6 ± 74.3             | 339.9 (259.8-434.1)              | <b>0.001</b>     |
| <b>IP-10</b>          | 539.4 (397.7-767.9)      | 575.9 (443.6-725.4)              | 0.576            |
| <b>MCP-1</b>          | 243.3 (215.9-287.8)      | 323.1 ± 105.0                    | <b>0.018</b>     |
| <b>MDC</b>            | 912.3 ± 255.5            | 1059.7 (887.9-1279.2)            | <b>0.005</b>     |
| <b>MIP-1β</b>         | 131.5 (102.0-167.8)      | 161.9 ± 48.3                     | <b>0.047</b>     |
| <b>TARC</b>           | 218.6 (120.7-531.7)      | 275.4 (168.6-412.4)              | 0.316            |
| <b>CRP (ng/mL)</b>    | 871.3 (528.6-3353.3)     | 2769.3 (1037.6-5236.5)           | <b>0.030</b>     |

**Supplementary table 2:** Plasma concentrations of inflammatory factors. Results (in pg/mL, unless otherwise stated) displayed as either mean ± SD or median (1<sup>st</sup>-3<sup>rd</sup> quartiles) based on distribution of the data. Boldface font indicates statistical significance (p<0.05).

STROBE Statement—Checklist of items that should be included in reports of *cross-sectional studies*

|                              | Item No | Recommendation                                                                                                                                                                                    | Page No            |
|------------------------------|---------|---------------------------------------------------------------------------------------------------------------------------------------------------------------------------------------------------|--------------------|
| <b>Title and abstract</b>    | 1       | (a) Indicate the study's design with a commonly used term in the title or the abstract                                                                                                            | 1, 2               |
|                              |         | (b) Provide in the abstract an informative and balanced summary of what was done and what was found                                                                                               | 2                  |
| <b>Introduction</b>          |         |                                                                                                                                                                                                   |                    |
| Background/rationale         | 2       | Explain the scientific background and rationale for the investigation being reported                                                                                                              | 3                  |
| Objectives                   | 3       | State specific objectives, including any prespecified hypotheses                                                                                                                                  | 4                  |
| <b>Methods</b>               |         |                                                                                                                                                                                                   |                    |
| Study design                 | 4       | Present key elements of study design early in the paper                                                                                                                                           | 4                  |
| Setting                      | 5       | Describe the setting, locations, and relevant dates, including periods of recruitment, exposure, follow-up, and data collection                                                                   | 4                  |
| Participants                 | 6       | (a) Give the eligibility criteria, and the sources and methods of selection of participants                                                                                                       | 4                  |
| Variables                    | 7       | Clearly define all outcomes, exposures, predictors, potential confounders, and effect modifiers. Give diagnostic criteria, if applicable                                                          | 4-5                |
| Data sources/<br>measurement | 8*      | For each variable of interest, give sources of data and details of methods of assessment (measurement). Describe comparability of assessment methods if there is more than one group              | 4-5                |
| Bias                         | 9       | Describe any efforts to address potential sources of bias                                                                                                                                         | 4-5                |
| Study size                   | 10      | Explain how the study size was arrived at                                                                                                                                                         | Secondary analysis |
| Quantitative variables       | 11      | Explain how quantitative variables were handled in the analyses. If applicable, describe which groupings were chosen and why                                                                      | 5                  |
| Statistical methods          | 12      | (a) Describe all statistical methods, including those used to control for confounding                                                                                                             | 5-6                |
|                              |         | (b) Describe any methods used to examine subgroups and interactions                                                                                                                               | 5                  |
|                              |         | (c) Explain how missing data were addressed                                                                                                                                                       | 5                  |
|                              |         | (d) If applicable, describe analytical methods taking account of sampling strategy                                                                                                                | n/a                |
|                              |         | (e) Describe any sensitivity analyses                                                                                                                                                             | n/a                |
| <b>Results</b>               |         |                                                                                                                                                                                                   |                    |
| Participants                 | 13*     | (a) Report numbers of individuals at each stage of study—eg numbers potentially eligible, examined for eligibility, confirmed eligible, included in the study, completing follow-up, and analysed | Secondary analysis |
|                              |         | (b) Give reasons for non-participation at each stage                                                                                                                                              | n/a                |
|                              |         | (c) Consider use of a flow diagram                                                                                                                                                                | n/a                |
| Descriptive data             | 14*     | (a) Give characteristics of study participants (eg demographic, clinical, social) and information on exposures and potential confounders                                                          | Table 1            |
|                              |         | (b) Indicate number of participants with missing data for each variable of interest                                                                                                               | Supp. material     |

1  
2  
3  
4  
5  
6  
7  
8  
9  
10  
11  
12  
13  
14  
15  
16  
17  
18  
19  
20  
21  
22  
23  
24  
25  
26  
27  
28  
29  
30  
31  
32  
33  
34  
35  
36  
37  
38  
39  
40  
41  
42  
43  
44  
45  
46  
47  
48  
49  
50  
51  
52  
53  
54  
55  
56  
57  
58  
59  
60

|                          |     |                                                                                                                                                                                                              |                  |
|--------------------------|-----|--------------------------------------------------------------------------------------------------------------------------------------------------------------------------------------------------------------|------------------|
| Outcome data             | 15* | Report numbers of outcome events or summary measures                                                                                                                                                         |                  |
| Main results             | 16  | (a) Give unadjusted estimates and, if applicable, confounder-adjusted estimates and their precision (eg, 95% confidence interval). Make clear which confounders were adjusted for and why they were included | Table 2, Table 3 |
|                          |     | (b) Report category boundaries when continuous variables were categorized                                                                                                                                    | n/a              |
|                          |     | (c) If relevant, consider translating estimates of relative risk into absolute risk for a meaningful time period                                                                                             | n/a              |
| Other analyses           | 17  | Report other analyses done—eg analyses of subgroups and interactions, and sensitivity analyses                                                                                                               | n/a              |
| <b>Discussion</b>        |     |                                                                                                                                                                                                              |                  |
| Key results              | 18  | Summarise key results with reference to study objectives                                                                                                                                                     | 12               |
| Limitations              | 19  | Discuss limitations of the study, taking into account sources of potential bias or imprecision. Discuss both direction and magnitude of any potential bias                                                   | 15-16            |
| Interpretation           | 20  | Give a cautious overall interpretation of results considering objectives, limitations, multiplicity of analyses, results from similar studies, and other relevant evidence                                   | 12-15            |
| Generalisability         | 21  | Discuss the generalisability (external validity) of the study results                                                                                                                                        | 14-15            |
| <b>Other information</b> |     |                                                                                                                                                                                                              |                  |
| Funding                  | 22  | Give the source of funding and the role of the funders for the present study and, if applicable, for the original study on which the present article is based                                                | 15               |

\*Give information separately for exposed and unexposed groups.

**Note:** An Explanation and Elaboration article discusses each checklist item and gives methodological background and published examples of transparent reporting. The STROBE checklist is best used in conjunction with this article (freely available on the Web sites of PLoS Medicine at <http://www.plosmedicine.org/>, Annals of Internal Medicine at <http://www.annals.org/>, and Epidemiology at <http://www.epidem.com/>). Information on the STROBE Initiative is available at [www.strobe-statement.org](http://www.strobe-statement.org).

# BMJ Open

## Low-grade inflammation in type 2 diabetes: A cross-sectional study from a Danish diabetes out-patient clinic

|                                 |                                                                                                                                                                                                                                                                                                                                                                                                                                                                                                                                                                                                                                                                                                                                             |
|---------------------------------|---------------------------------------------------------------------------------------------------------------------------------------------------------------------------------------------------------------------------------------------------------------------------------------------------------------------------------------------------------------------------------------------------------------------------------------------------------------------------------------------------------------------------------------------------------------------------------------------------------------------------------------------------------------------------------------------------------------------------------------------|
| Journal:                        | <i>BMJ Open</i>                                                                                                                                                                                                                                                                                                                                                                                                                                                                                                                                                                                                                                                                                                                             |
| Manuscript ID                   | bmjopen-2022-062188.R2                                                                                                                                                                                                                                                                                                                                                                                                                                                                                                                                                                                                                                                                                                                      |
| Article Type:                   | Original research                                                                                                                                                                                                                                                                                                                                                                                                                                                                                                                                                                                                                                                                                                                           |
| Date Submitted by the Author:   | 17-Nov-2022                                                                                                                                                                                                                                                                                                                                                                                                                                                                                                                                                                                                                                                                                                                                 |
| Complete List of Authors:       | Okdahl, Tina; Aalborg University Hospital, Mech-Sense, Department of Gastroenterology and Hepatology<br>Wegeberg, Anne-Marie; Aalborg University Hospital, Mech-Sense, Department of Gastroenterology & Hepatology, ; Aalborg Universitet, Department of Clinical Medicine<br>Pociot, Flemming; Steno Diabetes Center Copenhagen; University of Copenhagen Faculty of Health and Medical Sciences<br>Brock, Birgitte; Steno Diabetes Center Copenhagen<br>Størling, Joachim; Steno Diabetes Center Copenhagen; University of Copenhagen, Department of Biomedical Sciences<br>Brock, Christina; Aalborg University Hospital, Mech-Sense, Department of Gastroenterology and Hepatology; Aalborg University, Department of Clinical Medicine |
| <b>Primary Subject Heading</b>: | Diabetes and endocrinology                                                                                                                                                                                                                                                                                                                                                                                                                                                                                                                                                                                                                                                                                                                  |
| Secondary Subject Heading:      | Immunology (including allergy)                                                                                                                                                                                                                                                                                                                                                                                                                                                                                                                                                                                                                                                                                                              |
| Keywords:                       | DIABETES & ENDOCRINOLOGY, IMMUNOLOGY, Diabetic neuropathy < DIABETES & ENDOCRINOLOGY                                                                                                                                                                                                                                                                                                                                                                                                                                                                                                                                                                                                                                                        |
|                                 |                                                                                                                                                                                                                                                                                                                                                                                                                                                                                                                                                                                                                                                                                                                                             |

SCHOLARONE™  
Manuscripts



I, the Submitting Author has the right to grant and does grant on behalf of all authors of the Work (as defined in the below author licence), an exclusive licence and/or a non-exclusive licence for contributions from authors who are: i) UK Crown employees; ii) where BMJ has agreed a CC-BY licence shall apply, and/or iii) in accordance with the terms applicable for US Federal Government officers or employees acting as part of their official duties; on a worldwide, perpetual, irrevocable, royalty-free basis to BMJ Publishing Group Ltd ("BMJ") its licensees and where the relevant Journal is co-owned by BMJ to the co-owners of the Journal, to publish the Work in this journal and any other BMJ products and to exploit all rights, as set out in our [licence](#).

The Submitting Author accepts and understands that any supply made under these terms is made by BMJ to the Submitting Author unless you are acting as an employee on behalf of your employer or a postgraduate student of an affiliated institution which is paying any applicable article publishing charge ("APC") for Open Access articles. Where the Submitting Author wishes to make the Work available on an Open Access basis (and intends to pay the relevant APC), the terms of reuse of such Open Access shall be governed by a Creative Commons licence – details of these licences and which [Creative Commons](#) licence will apply to this Work are set out in our licence referred to above.

Other than as permitted in any relevant BMJ Author's Self Archiving Policies, I confirm this Work has not been accepted for publication elsewhere, is not being considered for publication elsewhere and does not duplicate material already published. I confirm all authors consent to publication of this Work and authorise the granting of this licence.

**TITLE PAGE**

**Full Title:** Low-grade inflammation in type 2 diabetes: A cross-sectional study from a Danish diabetes out-patient clinic

**Authors:**

Tina Okdahl<sup>1</sup>, Anne-Marie Wegeberg<sup>1,2</sup>, Flemming Pociot<sup>3,4</sup>, Birgitte Brock<sup>3</sup>, Joachim Størling<sup>3,5</sup>, Christina Brock<sup>1,2</sup>

<sup>1</sup>Mech-Sense, Department of Gastroenterology and Hepatology, Aalborg University Hospital, Aalborg, Denmark

<sup>2</sup>Department of Clinical Medicine, Aalborg University, Søndre Skovvej 15, 9000 Aalborg, Denmark

<sup>3</sup>Steno Diabetes Center Copenhagen, Gentofte, Denmark

<sup>4</sup>Faculty of Health and Medical Sciences, University of Copenhagen, Copenhagen, Denmark

<sup>5</sup>Department of Biomedical Sciences, University of Copenhagen, Copenhagen, Denmark

**Corresponding Author:**

Professor Christina Brock, DVM, PhD

Mech-Sense, Department of Gastroenterology and Hepatology, Aalborg University Hospital and Clinical Institute, Aalborg University, Mølleparkvej 4, Aalborg 9000, Denmark

Telephone: +45 9766 0510, e-mail: [christina.brock@rn.dk](mailto:christina.brock@rn.dk)

**Word count:** 3967

**Keywords:** Diabetes, inflammation, comorbidity, cytokine, chemokine

1  
2  
3  
4  
5  
6  
7  
8  
9  
10  
11  
12  
13  
14  
15  
16  
17  
18  
19  
20  
21  
22  
23  
24  
25  
26  
27  
28  
29  
30  
31  
32  
33  
34  
35  
36  
37  
38  
39  
40  
41  
42  
43  
44  
45  
46  
47  
48  
49  
50  
51  
52  
53  
54  
55  
56  
57  
58  
59  
60

## STRUCTURED ABSTRACT

**Objectives:** To investigate low-grade inflammation in type 2 diabetes and explore associations to clinical aspects as well as micro- and macrovascular complications.

**Design:** Cross-sectional analysis

**Setting:** The out-patient diabetes clinic at the department of endocrinology at Aalborg University Hospital, Denmark

**Participants:** 100 participants with type 2 diabetes confirmed by a HbA1C  $\geq$  6.5% for a minimum of one year and 21 healthy controls

**Outcome measures:** Plasma levels of 27 inflammation-related biomarkers measured by immunoassay. Associations with micro-and macrovascular complications, body weight, glycemc control, medication, and sex were investigated in the diabetes cohort.

**Results:** Plasma levels of TNF- $\alpha$  and eotaxin, were elevated in type 2 diabetes ( $p < 0.05$ ), while IL-7 was decreased ( $p < 0.001$ ). IL-12/IL-23p40, IL-15, MDC, and CRP levels were increased with body weight ( $p < 0.05$ ), while eotaxin and TNF- $\alpha$  were increased with elevated HbA1c levels ( $p < 0.04$ ). DPP-4 inhibitor therapy was associated with lower levels of IP-10, MDC, and TARC ( $p < 0.02$ ), while females had higher levels of MDC ( $p = 0.027$ ). Individuals with  $\geq 3$  diabetic complications had elevated levels of IL-6, IL-10, IL-12/IL-23p40, IL-15, and CRP compared to those with  $\leq 3$  ( $p < 0.05$ ).

**Conclusion:** The level of low-grade inflammation in type 2 diabetes is associated with obesity, glycemc regulation, therapeutical management, sex, and complications. Our results underline the importance of addressing inflammatory issues in type 2 diabetes, as these may predispose for crippling comorbidities.

### Strengths and limitations of this study:

- Analysis of a broad palette of inflammatory biomarkers in plasma in 100 participants with type 2 diabetes and 21 healthy controls
- High degree of heterogeneity of our cohort, which allows for generalization to the population of type 2 diabetes
- Well-characterized cohort in regard to micro- and macrovascular comorbidities
- The cross-sectional design is a limitation of the study and hinders any assumptions of causality
- This study is based on secondary analysis and thus inclusion and exclusion criteria were not designed specifically with the investigation of inflammatory biomarkers in mind

## 1 INTRODUCTION

Tight glycaemic regulation is vital for balancing the existing energy demand in tissues by combining resources originating from the nutritional supply and release from internal storages. Low blood glucose is potentially life-threatening, while long-term elevated levels have several metabolic consequences, including sorbitol production, mitochondrial dysfunction, and formation of advanced glycation end products (1).

Chronic hyperglycemia can be caused either by insulin deficiency, as seen in type 1 diabetes, or by a combination of generalized insulin resistance in peripheral tissues and insufficient insulin production resulting in type 2 diabetes. The latter is the most prevalent diabetes type accounting for up to 90% of the cases (2).

The pathogenesis of type 2 diabetes is highly complex and multifactorial, and many aspects of the disease require further elucidation. However, it is clear that obesity along with a sedentary lifestyle is a substantial risk factor for development of insulin resistance and type 2 diabetes through stress-induced inflammation in adipose tissue leading to insensitivity of the insulin receptor (3). In recent years, the previous view on adipose tissue as a mere storage of fat has been disproved, and it is now accepted that especially visceral adipose tissue possesses important endocrine and inflammatory properties. As an example, adipocytes activated by expansion-associated hypoxia secrete cytokines and so-called adipokines, many of which are pro-inflammatory in nature (4). As the prevalence of both obesity and type 2 diabetes continue to rise worldwide (2), a better understanding of the inflammatory link between these lifestyle-associated conditions is crucial.

In addition to obesity-induced inflammation, excess glucose availability in diabetes causes alterations in normal homeostasis, facilitating the progression of proinflammatory cytokine release to the microenvironment. Low-grade systemic inflammation is thus regarded as an accompanying condition in type 2 diabetes (5). Increased levels of proinflammatory biomarkers such as interleukin (IL) 6 and C-reactive protein (CRP) have been shown to be associated with an increased risk of type 2 diabetes development in several prospective studies (6,7). This suggests that the pathogenetic mechanisms in type 2 diabetes is influenced by systemic low-grade inflammation. It is, however, unclear whether this proinflammatory state remains during the course of the disease or if it increases or diminishes over time. In addition, standard medical treatment in type 2 diabetes such as statins and dipeptidyl peptidase-4 (DPP-4) inhibitors have immunomodulating properties and may thus influence the inflammatory response (8,9).

The low-grade systemic inflammation in type 2 diabetes is clinically essential, because it is associated with the development and progression of long-term complications such as nephropathy, neuropathy and retinopathy (10–12). Moreover, low-grade inflammation is associated with cardiovascular disease in diabetes (13), which is the primary cause of morbidity and mortality in individuals with type 2 diabetes (14).



1  
2  
3  
4 The aim of this study was to investigate the level of low-grade systemic inflammation in a cohort of  
5 individuals with type 2 diabetes with varying disease duration. We hypothesized that individuals with type 2  
6 diabetes exhibited higher levels of pro-inflammatory biomarkers than healthy controls, and accordingly, the  
7 primary endpoint was differences in circulating inflammatory biomarkers in healthy and people with type 2  
8 diabetes. Furthermore, we hypothesized that levels of pro-inflammatory biomarkers in type 2 diabetes were  
9 associated with disease duration, obesity, glycemic control, therapeutical management, and presence of  
10 diabetes-related micro- and macrovascular complications. The secondary endpoints were thus to investigate  
11 associations between inflammatory biomarkers and clinical characteristics of type 2 diabetes.  
12  
13  
14  
15  
16

## 17 **2 METHODS**

### 18 **2.1 Study population**

19  
20 All individuals with type 2 diabetes scheduled for regular health visits at the out-patient diabetes clinic at the  
21 department of endocrinology at Aalborg University Hospital, Denmark were informed about the study and  
22 screened for eligibility after signing of the informed consent form, and 100 participants were included for  
23 cross-sectional analysis. Inclusion criteria included Northern European descent, age above 18 years, a  
24 verified diagnosis of type 2 diabetes with HbA1C  $\geq$  6.5% for a minimum of one year, and stable diabetes  
25 treatment. People with other endocrinological or neurological diseases were excluded. Prior to study  
26 initiation, the protocol was approved by The North Denmark Region Committee on Health Research Ethics,  
27 Denmark (N-20170045). The primary outcome of the study was cardiac vagal tone and the results have been  
28 published elsewhere (15). The control cohort consisted of sex-matched healthy volunteers (n=21) recruited  
29 for a randomized controlled trial (N-20090008) likewise conducted by our research group.  
30  
31  
32  
33  
34  
35  
36

### 37 **2.2 Blood samples**

38 Morning blood samples were drawn from the cubital vein after a fasting period of minimum six hours. For  
39 analysis of inflammatory biomarkers, blood was collected in EDTA tubes and centrifuged for 10 minutes at  
40 1000 g. Isolated plasma was aliquoted in appropriate volumes and stored in a biobank at -80°C until the  
41 complete data set was collected. All samples were thawed just prior to analysis. Samples from both cohorts  
42 were analyzed consecutively to minimize interplate variability. For analysis of hemoglobin A1c (HbA1c),  
43 blood was collected in lithium heparin tubes and analyzed by routine biochemical procedures.  
44  
45  
46  
47  
48  
49

### 50 **2.3 Inflammatory biomarkers**

51 Biomarker concentrations in plasma samples were analyzed using the V-PLEX Neuroinflammation Panel 1  
52 Human Kit (Meso Scale Diagnostics® [MSD], Gaithersburg, MD, USA) on a MESO QuickPlex SQ 120  
53 instrument (MSD) according to the manufacturer's specifications. Sample values below the detection limit of  
54 the assay were assigned a value of the detection limit divided by  $\sqrt{2}$  (16). If more than 30% of the measured  
55 samples for any given biomarker were below the detection limit, the biomarker was excluded from the  
56 analysis. Likewise, samples with a coefficient of variation (CV)  $>$ 30% between duplicate measurements  
57  
58  
59  
60

1  
2  
3  
4 were excluded from the analysis (Supplementary Table 1). Biomarkers on the panel included: IL-1 $\alpha$ , IL-1 $\beta$ ,  
5 IL-2, IL-4, IL-5, IL-6, IL-7, IL-8, IL-10, IL-12/IL-23p40, IL-13, IL-15, IL-16, IL-17A, interferon (IFN)- $\gamma$ ,  
6 tumor necrosis factor (TNF)- $\alpha$ , TNF- $\beta$ , eotaxin, eotaxin-3, IFN- $\gamma$ -induced protein (IP)-10, monocyte  
7 chemoattractant protein (MCP)-1, MCP-4, macrophage-derived chemokine (MDC), macrophage  
8 inflammatory protein (MIP)-1 $\alpha$ , MIP-1 $\beta$ , thymus and activation regulated chemokine (TARC), and CRP.  
9  
10  
11  
12

#### 13 **2.4 Assessment of diabetic comorbidities**

14 All participants in the type 2 diabetes cohort underwent investigations concerning common diabetic  
15 comorbidities: 1) *Peripheral neuropathy*: Signs of peripheral neuropathy was investigated by vibration  
16 perception threshold (VPT) at the dorsum of the first phalanx using a biothesiometer (Bio-Medical  
17 Instruments). The measurement was done three consecutive times bilaterally, and the final vibration  
18 perception threshold was calculated as the mean value of both feet. Results above 18 volts were considered  
19 abnormal and thus as signs of diabetic peripheral neuropathy. 2) *Nephropathy*: Morning urine samples were  
20 collected by participants at home and handed over to study personnel for standard biochemical analysis.  
21 Diabetic nephropathy was defined as a urine albumin/creatinine ratio above 30 mg/g, which is a standard cut-  
22 off for early diabetic nephropathy and microalbuminuria. 3) *Retinopathy*: Participants were asked if they had  
23 ever been diagnosed with proliferative or non-proliferative retinopathy 4) *Cardiac autonomic neuropathy*:  
24 Electrocardiographic recordings by the VAGUS™ device (Medicus Engineering Aps, Aarhus, Denmark)  
25 described in detail elsewhere (15) were applied for evaluation of cardiac autonomic neuropathy. Recordings  
26 were made during rest, postural change, deep breathing, and the Valsalva maneuver. Age-specific cut-off  
27 values were applied (17), and abnormal results in one or more exercises were considered as signs of cardiac  
28 autonomic neuropathy.  
29  
30  
31  
32  
33  
34  
35  
36  
37  
38

#### 39 **2.5 Data handling and statistics**

40 Distribution of raw and log-transformed data was evaluated by Shapiro-Wilk test of normality. Pairwise  
41 comparisons among groups were achieved by independent samples t-test or Mann-Whitney U based on data  
42 distribution. Differences in inflammatory biomarkers between healthy and type 2 diabetes were investigated  
43 firstly by pairwise comparisons and secondly by a logistic regression model including age and BMI as  
44 confounders, as these factors were different between groups and known to influence systemic low-grade  
45 inflammation. For the volcano plot, the fold difference was calculated as the log<sub>2</sub>-ratio between two group  
46 means. Differences in inflammatory biomarkers between people with short- and long-term disease duration  
47 were likewise investigated by a logistic regression model including age and BMI as confounders. Multiple  
48 logistic regression analyses were performed to investigate the association between clinical parameters and  
49 inflammatory biomarkers. The independent variables included obesity (BMI<30 versus BMI>30), blood  
50 glucose level (HbA1c<55 versus HbA1c>55), DPP-4 inhibitor therapy, GLP-1 receptor agonist therapy, and  
51 sex. Additionally, two models were applied in which associations were adjusted for the remaining clinical  
52  
53  
54  
55  
56  
57  
58  
59  
60

variables, and total plasma cholesterol or statin therapy, all of which may have an impact on the systemic inflammatory status. Differences in inflammatory biomarkers between people with 0, 1, 2 or  $\geq 3$  comorbidities were investigated by a Bonferroni-corrected ANOVA and subsequently the Dunn's Test. An  $\alpha$ -level of 0.05 was applied for all analyses. The STATA software (StataCorp LLC, version 15.1) was applied for all statistical analyses.

## 2.6 Patient and public involvement

Patients or members of the public were not included in the design, conduction, reporting, or dissemination plans of this project.

## 3 RESULTS

### 3.1 Study population

Two subjects in the type 2 diabetes group were excluded due to hemolysis of collected blood samples. Individuals in the diabetes group were older, had higher BMI, and higher HbA1c compared to the healthy controls ( $p < 0.001$ ). On the contrary, healthy controls had higher total cholesterol ( $p < 0.001$ ), high-density lipoprotein (HDL) ( $p = 0.006$ ), and low-density lipoprotein (LDL) ( $p < 0.001$ ) compared to individuals in the type 2 diabetes cohort of which 66% were on lipid-lowering statin therapy. A full demographic overview can be found in Table 1.

|                          | Healthy<br>(n=21) | Type 2 diabetes<br>(n=98) | p-value |
|--------------------------|-------------------|---------------------------|---------|
| <b>Basic demography</b>  |                   |                           |         |
| Age (years)              | 52 (48-55)        | 65 (56-71)                | <0.001  |
| Sex (% of males)         | 71                | 63                        | 0.478   |
| BMI (kg/m <sup>2</sup> ) | 25.6 (23.7-28.0)  | 31.4 (27.5-34.5)          | <0.001  |
| Current smokers (%)      | 19                | 5                         | 0.028   |
| Disease duration (y)     | -                 | 10 (5-17)                 | -       |
| <b>Vital signs</b>       |                   |                           |         |
| Systolic BP (mmHg)       | 128 (119-137)     | 137 (128-147)             | 0.021   |
| Diastolic BP (mmHg)      | 76 ± 11           | 77 ± 9                    | 0.720   |
| Pulse (beats/min)        | 66 ± 7            | 69.8 ± 10                 | 0.110   |
| <b>Biochemistry</b>      |                   |                           |         |
| HbA1c                    |                   |                           |         |
| (mmol/mol)               | 33 (33-37)        | 55 (48-61.5)              | <0.001  |
| (%)                      | 5.2 (5.2-5.5)     | 7.2 (6.5-7.8)             | <0.001  |
| Cholesterol (mmol/l)     | 5.4 ± 0.9         | 3.9 ± 0.9                 | <0.001  |

|                                    |               |               |                  |
|------------------------------------|---------------|---------------|------------------|
| eGFR (mL/min/1.73 m <sup>2</sup> ) |               |               |                  |
| >90 (%)                            | 62            | 46            | 0.197            |
| 40-90 (%)                          | 38            | 52            | 0.264            |
| <40 (%)                            | 0             | <1            | 0.507            |
| HDL (mmol/l)                       | 1.5 (1.3-1.8) | 1.2 (1.0-1.5) | <b>0.006</b>     |
| LDL (mmol/l)                       | 3.3 ± 0.9     | 1.9 ± 0.7     | <b>&lt;0.001</b> |
| Triglycerides (mmol/l)             | 1.1 (0.7-1.4) | 1.4 (1.0-2.0) | <b>0.023</b>     |
| <b>Diabetic comorbidities</b>      |               |               |                  |
| Neuropathy (%)                     | -             | 60            | -                |
| Nephropathy (%)                    | -             | 19            | -                |
| Retinopathy (%)                    | -             | 8             | -                |
| CAN (%)                            | -             | 40            | -                |
| <b>Medication</b>                  |               |               |                  |
| Antihypertensives (%)              | -             | 67            | -                |
| DPP-4 inhibitor (%)                | -             | 18            | -                |
| Metformin (%)                      | -             | 78            | -                |
| SGLT-2 inhibitor (%)               | -             | 23            | -                |
| GLP-1 receptor agonist (%)         | -             | 23            | -                |
| Statins (%)                        | -             | 66            | -                |

**Table 1:** Demographic and clinical characteristics among groups. Results displayed as either mean ± SD or median (1<sup>st</sup>-3<sup>rd</sup> quartiles) based on distribution of the data. Boldface font indicates statistical significance (p<0.05). Antihypertensive medication includes ACE inhibitors, angiotensin II receptor antagonists, calcium channel blockers, beta blockers, diuretics, and I1-imidazoline receptor antagonists. BMI: Body mass index; eGFR: Estimated glomerular filtration rate; HDL: High-density lipoprotein; LDL: Low-density lipoprotein; CAN: Cardiac autonomic neuropathy; DPP-4: Dipeptidyl peptidase-4; SGLT: Sodium-glucose transport protein; GLP: Glucagon-like peptide.

### 3.2 Inflammatory biomarkers in type 2 diabetes compared to healthy

Plasma levels of 27 inflammatory biomarkers were measured in individuals with type 2 diabetes and healthy controls. Eleven biomarkers were excluded from the statistical analyses due to being undetectable or of insufficient measurement quality due to low levels (Supplementary Table 1). The remaining 16 biomarkers (IL-6, IL-7, IL-8, IL-10, IL-12/IL-23p40, IL-15, IL-16, IFN- $\gamma$ , TNF- $\alpha$ , eotaxin, IP-10, MCP-1, MDC, MIP-1 $\beta$ , TARC, CRP) were measured in  $\geq 95\%$  of the samples. The concentrations of TNF- $\alpha$  (p = 0.003) and CRP

( $p=0.030$ ) were significantly higher in the type 2 diabetes cohort compared to the control cohort (Figure 1). Similarly, 4 chemokines (eotaxin ( $p=0.001$ ), MCP-1 ( $p=0.018$ ), MDC ( $p=0.005$ ), and MIP-1 $\beta$  ( $p=0.047$ )) showed elevated levels in the diabetes cohort. In contrast, the level of cytokine IL-7 was significantly lower in participants with type 2 diabetes compared to healthy controls ( $p<0.001$ ). After adjustment for age and BMI, only IL-7, eotaxin, and TNF- $\alpha$  remained significantly different. Plasma concentrations of all measured biomarkers are presented in supplementary Table 2. When subdividing the type 2 diabetes cohort according to disease duration, only IL-10 was significantly different ( $p=0.008$ ) between groups, even after adjustment for age and BMI, with a modestly increased levels found in subjects with disease duration above ten years. (Table 2). Similarly, we investigated whether presence of CAN (early or manifest) influenced the levels of inflammatory factors, however, none of these reached significant levels (data not shown).

|                            |               | UNADJUSTED MODEL      |              | ADJUSTED MODEL        |              |
|----------------------------|---------------|-----------------------|--------------|-----------------------|--------------|
|                            |               | OR (95% CI)           | p-value      | OR (95% CI)           | p-value      |
| Cytokines                  | IL-7          | 1.03 (0.93-1.15)      | 0.565        | 1.04 (0.93-1.18)      | 0.466        |
|                            | IL-12         |                       |              |                       |              |
|                            | /IL-23p40     | 1.00 (1.00-1.00)      | 0.446        | 1.00 (0.99-1.01)      | 0.717        |
|                            | IL-15         | 1.51 (0.74-3.10)      | 0.256        | 1.32 (0.62-2.79)      | 0.471        |
|                            | IL-16         | 1.00 (1.00-1.00)      | 0.832        | 1.00 (1.00-1.00)      | 0.813        |
| Chemokines                 | Eotaxin       | 1.00 (1.00-1.00)      | 0.887        | 1.00 (1.00-1.00)      | 0.687        |
|                            | IP-10         | 1.00 (1.00-1.00)      | 0.512        | 1.00 (1.00-1.00)      | 0.244        |
|                            | MCP-1         | 1.00 (1.00-1.00)      | 0.864        | 1.00 (1.00-1.00)      | 0.523        |
|                            | MDC           | 1.00 (1.00-1.00)      | 0.810        | 1.00 (1.00-1.00)      | 0.319        |
|                            | MIP-1 $\beta$ | 1.00 (0.99-1.01)      | 0.992        | 1.00 (0.99-1.01)      | 0.916        |
|                            | TARC          | 1.00 (1.00-1.00)      | 0.719        | 1.00 (1.00-1.00)      | 0.260        |
| Pro-inflammatory cytokines | IL-6          | 1.34 (0.79-2.27)      | 0.271        | 1.21 (0.70-2.09)      | 0.504        |
|                            | IL-8          | 1.00 (0.94-1.06)      | 0.983        | 1.00 (0.94-1.06)      | 0.904        |
|                            | IL-10         | 111.85 (2.86-4377.78) | <b>0.012</b> | 103.97 (2.30-4699.58) | <b>0.017</b> |
|                            | IFN- $\gamma$ | 1.02 (0.97-1.08)      | 0.438        | 1.02 (0.96-1.09)      | 0.447        |
|                            | TNF- $\alpha$ | 1.69 (0.70-4.12)      | 0.246        | 1.78 (0.69-4.62)      | 0.234        |
| Vascular injury            | CRP           | 1.00 (1.00-1.00)      | 0.697        | 1.00 (1.00-1.00)      | 0.713        |

1  
2  
3  
4 **Table 2:** Odds ratio (OR) for associations between plasma concentrations of inflammatory factors (cytokines  
5 (n=4), chemokines (n=6), pro-inflammatory cytokines (n=5), vascular injury (n=1)) in type 2 diabetes with  
6 short-term disease duration (<10 years, n=44) and long-term disease duration (>10 years, n=50) unadjusted  
7 and adjusted for age and BMI. Boldface font indicates statistical significance ( $p<0.05$ ).  
8  
9  
10  
11  
12

### 13 **3.3 Inflammatory biomarkers in subgroups of type 2 diabetes**

14  
15 Obesity was significantly associated with concentration of five inflammatory biomarkers (IL-12/IL-23p40,  
16 IL-15, IFN- $\gamma$ , MDC, and CRP) (Table 3 – only analytes with p-value below 0.05 shown). When adjusting for  
17 HbA1c, sex, and total plasma cholesterol or statin use, IL-12/IL-23p40, IL-15, and CRP remained  
18 statistically significant associated with obesity. HbA1c was significantly associated with eotaxin and IL-  
19 12/IL-23p40 levels after adjusting for confounders, and levels of MDC were associated with sex with lower  
20 levels found in male subjects compared to females. Lower levels of IL-8, IP-10, and MDC were associated  
21 with DPP-4 inhibitor therapy, while higher levels of TNF- $\alpha$  were associated with GLP-1 receptor agonist  
22 therapy. Lastly, SGLT2 inhibitor therapy was associated with lower levels of MDC.  
23  
24  
25  
26  
27  
28  
29  
30  
31  
32  
33  
34  
35  
36  
37  
38  
39  
40  
41  
42  
43  
44  
45  
46  
47  
48  
49  
50  
51  
52  
53  
54  
55  
56  
57  
58  
59  
60

|                                          | UNADJUSTED MODEL |              | ADJUSTED MODEL 1 |              | ADJUSTED MODEL 2 |              |
|------------------------------------------|------------------|--------------|------------------|--------------|------------------|--------------|
|                                          | OR (95% CI)      | p-value      | OR (95% CI)      | p-value      | OR (95% CI)      | p-value      |
| <b>A. Obesity</b>                        |                  |              |                  |              |                  |              |
| IL-12/IL-23p40                           | 1.01 (1.00-1.02) | <b>0.003</b> | 1.01 (1.00-1.02) | <b>0.007</b> | 1.01 (1.00-1.02) | <b>0.007</b> |
| IL-15                                    | 2.32 (1.05-5.11) | <b>0.038</b> | 2.30 (1.02-5.15) | <b>0.043</b> | 2.30 (1.02-5.16) | <b>0.043</b> |
| IFN- $\gamma$                            | 1.12 (1.00-1.25) | <b>0.041</b> | 1.10 (0.99-1.23) | 0.087        | 1.10 (0.99-1.22) | 0.091        |
| MDC                                      | 1.00 (1.00-1.00) | <b>0.029</b> | 1.00 (1.00-1.00) | 0.051        | 1.00 (1.00-1.00) | <b>0.049</b> |
| CRP                                      | 1.00 (1.00-1.00) | <b>0.001</b> | 1.00 (1.00-1.00) | <b>0.001</b> | 1.00 (1.00-1.00) | <b>0.001</b> |
| <b>B. Blood glucose</b>                  |                  |              |                  |              |                  |              |
| IL-8                                     | 1.08 (1.00-1.15) | <b>0.037</b> | 1.07 (0.99-1.14) | 0.076        | 1.07 (1.00-1.15) | 0.055        |
| TNF- $\alpha$                            | 3.25 (1.21-8.73) | <b>0.019</b> | 2.64 (0.95-7.34) | 0.062        | 3.09 (1.11-8.58) | <b>0.031</b> |
| Eotaxin                                  | 1.00 (1.00-1.01) | <b>0.031</b> | 1.00 (1.00-1.01) | <b>0.027</b> | 1.00 (1.00-1.01) | <b>0.025</b> |
| <b>C. Sex</b>                            |                  |              |                  |              |                  |              |
| MDC                                      | 1.00 (1.00-1.00) | <b>0.009</b> | 1.00 (1.00-1.00) | <b>0.021</b> | 1.00 (1.00-1.00) | <b>0.027</b> |
| <b>D. DPP-4 inhibitor therapy</b>        |                  |              |                  |              |                  |              |
| IL-8                                     | 0.88 (0.79-0.99) | <b>0.040</b> | 0.89 (0.79-1.00) | 0.052        | 0.89 (0.79-1.00) | 0.051        |
| IP-10                                    | 1.00 (1.00-1.00) | <b>0.013</b> | 0.99 (0.99-1.00) | <b>0.008</b> | 0.99 (0.99-1.00) | <b>0.008</b> |
| MDC                                      | 1.00 (1.00-1.00) | <b>0.027</b> | 1.00 (1.00-1.00) | <b>0.011</b> | 1.00 (1.00-1.00) | <b>0.011</b> |
| TARC                                     | 1.00 (1.00-1.01) | <b>0.004</b> | 1.00 (1.00-1.01) | <b>0.005</b> | 1.00 (1.00-1.01) | <b>0.005</b> |
| <b>E. GLP-1 receptor agonist therapy</b> |                  |              |                  |              |                  |              |
| IL-8                                     | 1.08 (1.01-1.15) | <b>0.025</b> | 1.08 (0.99-1.17) | 0.069        | 1.08 (1.00-1.18) | 0.058        |

|                                   |                   |              |                   |              |                   |              |
|-----------------------------------|-------------------|--------------|-------------------|--------------|-------------------|--------------|
| IL-15                             | 0.57 (0.23-1.41)  | 0.226        | 0.29 (0.09-0.95)  | <b>0.042</b> | 0.27 (0.08-0.92)  | <b>0.036</b> |
| IL-16                             | 1.00 (0.98-1.00)  | <b>0.042</b> | 1.00 (0.98-1.00)  | 0.077        | 1.00 (0.98-1.00)  | 0.068        |
| TNF- $\alpha$                     | 6.50 (2.07-20.42) | <b>0.001</b> | 4.60 (1.26-16.76) | <b>0.021</b> | 4.70 (1.25-17.69) | <b>0.022</b> |
| <b>F. SGLT2 inhibitor therapy</b> |                   |              |                   |              |                   |              |
| MDC                               | 1.00 (1.00-1.00)  | <b>0.014</b> | 1.00 (1.00-1.00)  | <b>0.027</b> | 1.00 (1.00-1.00)  | <b>0.033</b> |

**Table 3:** Multiple logistic regression analysis of plasma concentrations between A) type 2 diabetes+BMI<30 (n=40) and Type 2 diabetes+BMI>30 (n=58), B) type 2 diabetes with HbA1c<55(n=47) and type 2 diabetes with HbA1c>55 (n=51), C) male type 2 diabetes (n=62) and female type 2 diabetes (n=36), D) type 2 diabetes (n=80) and type 2 diabetes treated with DPP-4 inhibitors (n=18), E) type 2 diabetes (n=75) and type 2 diabetes treated with GLP-1 receptor agonists (n=23), and F) type 2 diabetes (n=75) and type 2 diabetes treated with SGLT2 inhibitor therapy (n=23) with overall R-squared value and effect size (95% CI) of BMI, HbA1c, sex, DPP-4 inhibitor therapy, GLP-1 receptor agonist therapy, or SGLT2 inhibitor therapy displayed. Results presented as odds ratio (OR) and 95% confidence interval (CI). Total plasma cholesterol, BMI, HbA1c, and sex were included in the adjusted model 1 as appropriate, while statin use, BMI, HbA1c, and sex were included in the adjusted model 2 as appropriate. For simplicity, only analytes with p-values below 0.05 in either model are shown. Bold font indicated statistical significance after Bonferroni adjustment (p<0.003).



### 3.4 Diabetic comorbidities

When subdividing the type 2 diabetes cohort into groups according to number of diabetic comorbidities, five biomarkers (IL-6, IL-10, IL12/IL-23p40, IL-15, and CRP) were significantly elevated in participants with three or more comorbidities compared to those with fewer or none (Figure 2 – only analytes with p-values below 0.05 shown).

## 4 DISCUSSION

In this study, we investigated the level of systemic low-grade inflammation in a cohort of individuals diagnosed with type 2 diabetes. Elevated levels of several inflammatory biomarkers were found in comparison to healthy controls, evident in both short- and long-term disease duration. Moreover, in the type 2 diabetes cohort, obesity, hyperglycemia and female sex were found to be associated with elevated levels of various inflammatory biomarkers. Lastly, we were able to establish a connection between the number of common diabetic comorbidities and elevated levels of inflammatory biomarkers.

### 4.1 Inflammatory biomarkers in type 2 diabetes compared to healthy

After adjustment for age and BMI, we showed that IL-7 was significantly decreased, while eotaxin and TNF- $\alpha$  was significantly increased in type 2 diabetes compared to healthy. The majority of research regarding IL-7 has been conducted in type 1 diabetes, where elevated levels are shown compared to healthy (18). IL-7 is highly involved in T cell function and proliferation, and a role of this cytokine in mediating expansion of insulin-producing  $\beta$ -cell-autoreactive T cells have been proposed thus implicating IL-7 in the pathogenesis of type 1 diabetes (19). The decreased levels in type 2 diabetes compared to healthy controls found in this study were somewhat surprising but may reflect the lack of T-cell activation the pathology of type 2 diabetes. Eotaxin has been linked to the development of atherosclerosis by facilitating monocyte infiltration in smooth muscle cells under the influence of proinflammatory mediators (20), and elevated levels of this chemokine have previously been reported in type 1 diabetes individuals with complications compared to individuals with no diabetic complications as well as healthy controls (21). Increased levels of CRP have previously been reported in adults with type 2 diabetes (13,22), but in our cohorts, the difference could be attributed to a skewed distribution of age and BMI in the two cohorts.

IL-10 is generally regarded as an anti-inflammatory cytokine with the ability to dampen the immune response, and previous data have shown downregulation of IL-10 in both type 2 diabetes and obesity *per se* (23). This contrasts our findings, which showed no differences in the overall diabetes cohort but an increase in individuals with long disease duration. This observation could reflect manifestations of compensatory mechanisms toward a long-term elevated inflammatory environment attempting to elicit an anti-inflammatory response. However, pro-inflammatory factors (e.g. TNF- $\alpha$ ) were elevated regardless of disease duration suggesting that any attempt of balancing the immune response remain challenging in the presence of type 2 diabetes.

## 4.2 Inflammatory biomarkers in subgroups of type 2 diabetes

### *Obesity and blood glucose regulation*

In our type 2 diabetes cohort, obesity (BMI>30) was significantly associated with the levels of IL-12/IL-23p40 and CRP, while eotaxin and TNF- $\alpha$  levels were associated with glycaemic regulation (HbA1c). Previously it has been shown that TNF- $\alpha$  release is upregulated in connection with obesity and has been linked to the progression of insulin resistance (24,25). The fact that TNF- $\alpha$  was not associated with obesity in our cohort is thus surprising. However, elevated levels of TNF- $\alpha$  in adipose tissue, but not in plasma have previously been reported (26), which could also be the case in our cohort. In animal models, TNF- $\alpha$  antagonist treatment improves insulin resistance in obesity (27). A clinical study, however, failed to show the same effect in humans (28). Regarding eotaxin, this chemokine has been linked to the development of cardiovascular disease, which is likewise a complication to long-term hyperglycemia, and our findings of increased levels in dysregulated individuals could therefore be a possible sign of atherosclerosis (20).

### *Sex*

We showed that the level of the chemokine MDC was associated with sex with higher levels seen in females compared to males. Different obesity-related inflammatory pathways between men and women with metabolic syndrome have previously been shown. Increased levels of pro-inflammatory mediators seem to facilitate low-grade systemic inflammation in males, while an insufficient anti-inflammatory milieu appears to be dominant in females (29). These findings suggest that any inflammation-modulating therapy in obesity should be differentiated according to sex and underlying mechanisms. In our type 2 diabetes cohort, however, this pattern was not recreated, indicating that the crucial factor may be aspects related to the metabolic syndrome rather than hyperglycemia.

### *Therapeutical management*

Lower levels of three chemokines (IL-8, IP-10 and MDC) were all associated with DPP-4 inhibitor therapy. DPP-4 inhibitor therapy is known to improve glycaemic control via prevention of breakdown of the incretin hormone GLP-1. In addition, several cytokines and chemokines are also substrates of the DPP-4 enzyme, and DPP-4 inhibitor therapy thus possesses immunomodulating properties possibly facilitating low-grade systemic inflammation in diabetes (9). Potentially this could explain why promising *in vitro* anti-inflammatory actions of DPP-4 inhibitors have failed to show convincingly results in humans (30). Surprisingly, we found lower levels of three DPP-4 substrates (IL-8, IP-10, and MDC) in connection with DPP-4 inhibitor therapy. Though seemingly in contrast with the expected result, similar observations have previously been reported e.g. lower levels of eotaxin in type 2 diabetes during DPP-4 inhibitor therapy (31). In our study, however, eotaxin levels were unaffected by DPP-4 inhibitor therapy, underlining the need for further research in the immunomodulating effects of these compounds.

1  
2  
3  
4 GLP-1 receptor agonist therapy, which share the same pharmacodynamic endpoint as DPP-4 inhibitor  
5 therapy, is known to possess anti-inflammatory properties independent of improved glycaemic control (32).  
6 However, our results showed an approximately 25% increase in proinflammatory TNF- $\alpha$  levels in connection  
7 with GLP-1 receptor agonist therapy. This finding is unexpected and in contrast with a previous pilot study  
8 showing that liraglutide significantly decreased TNF- $\alpha$  levels in a type 2 diabetes cohort (33). Preclinical  
9 studies have likewise shown inhibitory effects of liraglutide on TNF- $\alpha$  expression (34). Other preclinical  
10 studies, however, have reported decreased proinflammatory effects of TNF- $\alpha$  through inhibition of the NK-  
11  $\kappa$ B pathway after GLP-1 receptor agonist therapy (35). If this is the case, this would neutralize the  
12 proinflammatory pathways caused by increased TNF- $\alpha$  levels seen in this study.  
13  
14  
15  
16  
17  
18  
19

20 In our cohort, SGLT2 inhibitor therapy was associated with a decrease in MDC, known to facilitate and  
21 amplify type II immune response (36). The anti-diabetic effects of SGLT2 inhibitors rely on the inhibition of  
22 renal reabsorption of glucose, but anti-inflammatory effects have also been reported including attenuation of  
23 IL-6 production (37) and modulation of macrophage polarization (38). The prospect of utilizing the anti-  
24 inflammatory potential of SGLT2 inhibitors in various pathologies is currently receiving much attention  
25 (39).  
26  
27  
28  
29

### 30 31 *Additional subgroups*

32 Apart from obesity, hyperglycemia, and sex, other factors such as current smoking status and specific  
33 medical therapy may likewise influence the level of inflammation in type 2 diabetes (40,41). In our cohort  
34 only 5% were smokers, which is surprisingly low, giving the fact that smoking is a substantial risk factor for  
35 development of type 2 diabetes (40). The low number of current smokers may reflect selection or reporting  
36 bias or perhaps successful free smoking cessation programs, as 40% of our participants reported to be  
37 previous smokers. This is, however, highly speculative. Nonetheless, the degree of a persistent pro-  
38 inflammatory effect of nicotine following smoking cessation is debated (42), and could potentially be  
39 influencing the results in the current study. Moreover, the high proportion of previous smokers could indicate  
40 that our cohort consisted of individuals with a high degree of determination and self-efficacy. Such selection  
41 bias is potentially also reflected in the median HbA1c of 55 mmol/mol, which is lower in comparison to  
42 other cohorts (13,43).  
43  
44  
45  
46  
47  
48  
49

50 In our cohort, 66% received lipid-lowering statin therapy, which is known to possess anti-inflammatory  
51 properties (8), which again could impact the level of investigated inflammatory biomarkers. Consequently,  
52 the reported elevated levels of several biomarkers compared to the healthy control cohort could be artificially  
53 low due to the anti-inflammatory effect of statins. Potentially this could explain why no pro-inflammatory  
54 biomarkers were increased in individuals with longer disease duration as these individuals were more likely  
55 to be on statin therapy.  
56  
57  
58  
59  
60

### 4.3 Diabetic comorbidities

It has previously been established that low-grade systemic inflammation plays a role in progression of diabetic complications (10–12). We found that IL-6, IL-10, IL-12/IL-23p40, IL-15, and CRP were elevated in individuals with multiple diabetic comorbidities compared to those with fewer or none. In the literature, IL-6 elevation has in particular been associated with diabetic complications (44–47). Likewise, increased levels of CRP has previously been linked to development and severity of diabetic complications (45,48). In addition, the observed elevated levels of IL-10 were primarily found in subjects with longer disease duration, which could reflect that diabetes comorbidities typically become more prevalent with increasing exposure to glycemic fluctuations and disease duration (49). Furthermore, IL-12 has previously been shown to be involved in the pathogenesis of several diabetic micro- and macrovascular comorbidities (50). Interestingly, a study in obese and insulin resistant IL-12 knockout mice showed that IL-12 disruption increased angiogenesis and restored peripheral blood flow perfusion through attenuation of oxidative stress and increased levels of angiogenic factors (51). In humans, a monoclonal antibody (Ustekinumab) targeting IL-12/IL-23p40 is currently used as a safe and effective treatment of psoriasis (52). Our data raise the intriguing possibility of applying this drug as a novel treatment option for diabetic micro- and macrovascular complications but needs to be investigated in future randomized controlled trials. Finally, circulating levels of IL-15 have been shown to be influenced by fat mass and physical activity (53). Furthermore, IL-15 improve lipid deposition and insulin sensitivity by activation of the GLUT-4 transporter in skeletal muscles. Hence, IL-15 has been proposed as a novel therapeutic option for treating obesity and type 2 diabetes (54). The increased levels of IL-15 in individuals with three or more comorbidities found in this study seem to contradict the beneficial effects normally attributed to this cytokine, but as this is a cross-sectional study no conclusions of causality can be made.

### 4.4 Strengths and limitations

A major limitation of this study is the cross-sectional study design, which hinders any assumptions of the predictive potential of low-grade inflammation and clinical characteristics of type 2 diabetes. On this dataset, we tested for association between low grade inflammation in type 2 diabetes, and we selected *a priori* the anti-inflammatory markers, as they are part of the underlying pathogenesis. According to the study design, each of the serum markers were tested individually, and based on our unadjusted and adjusted models we suggest an association to the specific marker IL-10. As the manufacturer of the multiplex assay had defined division of serum markers into cytokines (n=4), chemokines (n=6), pro-inflammatory cytokines (n=5), vascular injury (n=1), we believe that Bonferroni's correction is too conservative. The major strength of this study is the high degree of heterogeneity of our cohort, obtained by systematically screening all people in our out-patient diabetes clinic, thereby facilitating generalization to the larger population of type 2 diabetes. However, selection bias in which individuals with low symptom burdens are more likely to participate cannot be ruled out. Contrary, a majority of patients with complications, who regard participation

1  
2  
3  
4 in a clinical trial as a possibility to receive extra attention from health care professionals, is likewise  
5 conceivable. It should also be noted that because this study is based on secondary analyses, the inclusion and  
6 exclusion criteria were not designed to exclude participants with comorbidities or medication use, which  
7 could impact the levels of the investigated inflammatory factors. Lastly, registration of retinopathy was  
8 restricted to participant recollection and reporting. Objective measures or consultation in patient records  
9 would have improved the validity of this outcome.  
10  
11  
12  
13

#### 14 **4.5 Conclusion**

15 We showed that individuals with type 2 diabetes exhibit higher degrees of various inflammatory factors in  
16 plasma, and that obesity and glycemic dysregulation are associated with the level of specific inflammatory  
17 factors. Furthermore, a considerable increase in several inflammatory factors was seen in people with  
18 multiple diabetic comorbidities. Regarding medication, DPP-4 inhibitor therapy was associated with  
19 decreased levels of several chemokines, while increased TNF- $\alpha$  levels were observed in association with  
20 GLP-1 receptor agonist therapy. Taken together, our results show that individuals with type 2 diabetes have  
21 systemic low-grade inflammation. Although the cross-sectional nature of our study hinders the ability to look  
22 at the causality between systemic low-grade inflammation and diabetic complications, it is intriguing to  
23 speculate whether dampening of the inflammatory state could protect against development of comorbidities  
24 in type 2 diabetes.  
25  
26  
27  
28  
29  
30  
31  
32  
33  
34

#### 35 **ACKNOWLEDGEMENTS**

36 We are grateful to Lene Holm Fruensgaard Pedersen for assistance in blood sample collection, and to Nina  
37 Wittorff Jensen, Rebekka Hanne Gerwig and Charlotte Gade Farcinsen Leth for expert technical assistance.  
38  
39  
40  
41

#### 42 **AUTHOR CONTRIBUTIONS**

43 Study design and original idea by CB and BB. AMW collected the data. TO, AMW, FP, BB, JS, and CB  
44 analysed and interpreted the data. TO wrote the first draft, but all authors contributed to the final manuscript.  
45 CB are the guarantor of the work, has full access to the data in the study and takes responsibility for the  
46 integrity of the data and the accuracy of the data analysis. The data that support the findings of this study are  
47 available from the corresponding author upon reasonable request.  
48  
49  
50  
51  
52

#### 53 **COMPETING INTERESTS**

54 None  
55  
56  
57  
58  
59  
60

## FUNDING

CB received funding from the Talent Management Program, Aalborg University. AMW received funding from The Research Foundation of Health Science, Region of Northern Jutland. No funding source had any role in study design, data collection, data analysis, data interpretation, or the preparation of this article.

## DATA SHARING STATEMENT

Deidentified participant data are available upon reasonable request to the corresponding author.

## ETHICS APPROVAL

The protocol was approved by The North Denmark Region Committee on Health Research Ethics, Denmark (N-20170045)

## REFERENCES

1. Ighodaro OM. Molecular pathways associated with oxidative stress in diabetes mellitus. Vol. 108, *Biomedicine and Pharmacotherapy*. Elsevier Masson SAS; 2018. p. 656–62.
2. Federation ID. IDF Diabetes Atlas, 9th edn. Brussels [Internet]. 2019. Available from: <https://www.diabetesatlas.org>
3. Prasad M, Chen EW, Toh SA, et al. Autoimmune responses and inflammation in type 2 diabetes. Vol. 107, *Journal of Leukocyte Biology*. John Wiley and Sons Inc; 2020. p. 739–48.
4. Gonzalez AC de O, Costa TF, Andrade Z de A, et al. Wound healing - A literature review. *An Bras Dermatol*. 2016 Oct;91(5):614–20.
5. Gonzalez LL, Garrie K, Turner MD. Type 2 diabetes – An autoinflammatory disease driven by metabolic stress. Vol. 1864, *Biochimica et Biophysica Acta - Molecular Basis of Disease*. Elsevier B.V.; 2018. p. 3805–23.
6. Pradhan AD, Manson JE, Rifai N, et al. C-reactive protein, interleukin 6, and risk of developing type 2 diabetes mellitus. *J Am Med Assoc*. 2001 Jul 18;286(3):327–34.
7. Thorand B, Löwel H, Schneider A, et al. C-reactive protein as a predictor for incident diabetes mellitus among middle-aged men: Results from the MONICA Augsburg Cohort Study, 1984-1998. *Arch Intern Med*. 2003 Jan 13;163(1):93–9.

1  
2  
3  
4  
5  
6  
7  
8  
9  
10  
11  
12  
13  
14  
15  
16  
17  
18  
19  
20  
21  
22  
23  
24  
25  
26  
27  
28  
29  
30  
31  
32  
33  
34  
35  
36  
37  
38  
39  
40  
41  
42  
43  
44  
45  
46  
47  
48  
49  
50  
51  
52  
53  
54  
55  
56  
57  
58  
59  
60

8. Albert MA, Danielson E, Rifai N, et al. Effect of statin therapy on C-reactive protein levels: The pravastatin inflammation/CRP evaluation (PRINCE): A randomized trial and cohort study. *J Am Med Assoc.* 2001 Jul 4;286(1):64–70.
9. Shao S, Xu QQ, Yu X, et al. Dipeptidyl peptidase 4 inhibitors and their potential immune modulatory functions. *Pharmacol Ther.* 2020 May 1;209:107503.
10. Shao B-Y, Zhang S-F, Li H-D, et al. Epigenetics and Inflammation in Diabetic Nephropathy. *Front Physiol.* 2021 May 5;12.
11. Pop-Busui R, Boulton AJM, Feldman EL, et al. Diabetic Neuropathy: A Position Statement by the American Diabetes Association. *Diabetes Care.* 2017 Jan 20;40(1):136–54.
12. Nebbioso M, Lambiase A, Armentano M, et al. Diabetic retinopathy, oxidative stress, and sirtuins: an in depth look in enzymatic patterns and new therapeutic horizons. *Survey of Ophthalmology.* Elsevier Inc.; 2021.
13. Alexandraki KI, Piperi C, Ziakas PD, et al. Cytokine secretion in long-standing diabetes mellitus type 1 and 2: Associations with low-grade systemic inflammation. *J Clin Immunol.* 2008 Jul;28(4):314–21.
14. Maser RE, Mitchell BD, Vinik AI, et al. The Association Between Cardiovascular Autonomic Neuropathy and Mortality in Individuals With Diabetes: A meta-analysis. *Diabetes Care.* 2003 Jun 1;26(6):1895–901.
15. Wegeberg AM, Lunde ED, Riahi S, et al. Cardiac vagal tone as a novel screening tool to recognize asymptomatic cardiovascular autonomic neuropathy: Aspects of utility in type 1 diabetes. *Diabetes Res Clin Pract.* 2020 Dec 1;170.
16. Croghan CW, Egeghy PP. Methods of Dealing With Values Below the Limit of Detection Using Sas. *South SAS User Gr.* 2003;5.
17. Spallone V, Bellavere F, Scionti L, et al. Recommendations for the use of cardiovascular tests in diagnosing diabetic autonomic neuropathy. *Nutr Metab Cardiovasc Dis.* 2011 Jan;21(1):69–78.
18. Coulson DJ, Bakhshab S, Latief JS, et al. MiR-126, IL-7, CXCR1/2 receptors, inflammation and circulating endothelial progenitor cells: The study on targets for treatment pathways in a model of subclinical cardiovascular disease (type 1 diabetes mellitus). *J Transl Med.* 2021 Dec 1;19(1).
19. Monti P, Bonifacio E. Interleukin-7 and Type 1 Diabetes. *Curr Diab Rep.* 2014 Sep 5;14(9):518.
20. Wang Y, Luk AOY, Ma RCW, et al. Independent predictive roles of eotaxin Ala23Thr, paraoxonase

- 1  
2  
3  
4 2 Ser311Cys and  $\beta$ 3-adrenergic receptor Trp64Arg polymorphisms on cardiac disease in Type 2  
5 Diabetes - An 8-year prospective cohort analysis of 1297 patients. *Diabet Med.* 2010;27(4):376–83.  
6  
7  
8 21. Jamali Z, Nazari M, Khoramdelazad H, et al. Expression of CC chemokines CCL2, CCL5, and  
9 CCL11 is associated with duration of disease and complications in type-1 diabetes: A study on  
10 Iranian diabetic patients. *Clin Lab.* 2013;59(9–10):993–1001.  
11  
12  
13 22. Malik A, Morya RK, Saha S, et al. Oxidative stress and inflammatory markers in type 2 diabetic  
14 patients. *Eur J Clin Invest.* 2020 Jun 1;50(6).  
15  
16  
17 23. Van Exel E, Gussekloo J, De Craen AJM, et al. Low production capacity of interleukin-10 associates  
18 with the metabolic syndrome and type 2 diabetes: The Leiden 85-plus study. *Diabetes.* 2002 Apr  
19 1;51(4):1088–92.  
20  
21  
22 24. Hauner H, Bender M, Haastert B, et al. Plasma concentrations of soluble TNF-alpha receptors in  
23 obese subjects. *Int J Obes.* 1998;22(12):1239–43.  
24  
25  
26 25. Ruan H, Lodish HF. Insulin resistance in adipose tissue: Direct and indirect effects of tumor necrosis  
27 factor- $\alpha$ . Vol. 14, *Cytokine and Growth Factor Reviews.* Elsevier BV; 2003. p. 447–55.  
28  
29  
30 26. Hotamisligil GS, Arner P, Caro JF, et al. Increased adipose tissue expression of tumor necrosis factor-  
31  $\alpha$  in human obesity and insulin resistance. *J Clin Invest.* 1995 May 1;95(5):2409–15.  
32  
33  
34 27. Uysal KT, Wiesbrock SM, Marino MW, et al. Protection from obesity-induced insulin resistance in  
35 mice lacking TNF-  $\alpha$  function. *Nature.* 1997;389(6651):610–4.  
36  
37  
38 28. Bernstein LE, Berry J, Kim S, et al. Effects of etanercept in patients with the metabolic syndrome.  
39 *Arch Intern Med.* 2006 Apr 24;166(8):902–8.  
40  
41  
42 29. Ter Horst R, Van Den Munckhof ICL, Schraa K, et al. Sex-Specific Regulation of Inflammation and  
43 Metabolic Syndrome in Obesity. *Arterioscler Thromb Vasc Biol.* 2020;40(7):1787–800.  
44  
45  
46 30. Teragawa H, Morimoto T, Fujii Y, et al. Effect of Anagliptin versus Sitagliptin on Inflammatory  
47 Markers: Sub-Analysis from the REASON Trial. 2020;  
48  
49  
50 31. Aso Y, Kase M, Sagara M, et al. Teneeligliptin, a DPP-4 Inhibitor, Decreases Plasma Levels of  
51 Inflammatory Chemokines During a Standard Meal Test in Patients With Type 2 Diabetes. *Am J Med*  
52 *Sci.* 2020 Sep 1;360(3):261–7.  
53  
54  
55 32. Bray JJH, Foster-Davies H, Salem A, et al.  $\text{Glucagon-like peptide-1 receptor agonists}$   
56 improve biomarkers of inflammation and oxidative stress: A systematic review and meta-analysis of  
57 randomised controlled trials. *Diabetes, Obes Metab.* 2021 Aug 6;23(8):1806–22.  
58  
59  
60



1  
2  
3  
4  
5  
6  
7  
8  
9  
10  
11  
12  
13  
14  
15  
16  
17  
18  
19  
20  
21  
22  
23  
24  
25  
26  
27  
28  
29  
30  
31  
32  
33  
34  
35  
36  
37  
38  
39  
40  
41  
42  
43  
44  
45  
46  
47  
48  
49  
50  
51  
52  
53  
54  
55  
56  
57  
58  
59  
60

33. Savchenko LG, Digtar NI, Selikhova LG, et al. Liraglutide exerts an anti-inflammatory action in obese patients with type 2 diabetes. *Rom J Intern Med*. 2019 Sep 1;57(3):233–40.
34. Zhang J, Yi T, Cheng S, et al. Glucagon-like peptide-1 receptor agonist Exendin-4 improves neurological outcomes by attenuating TBI- induced inflammatory responses and MAPK activation in rats. *Int Immunopharmacol*. 2020 Sep 1;86:106715.
35. Liu Y-T, He T, Li H-Q, et al. Liraglutide improves pancreatic islet  $\beta$  cell apoptosis in rats with type 2 diabetes mellitus by inhibiting the IKK $\epsilon$ /NF- $\kappa$ B pathway. *Eur Rev Med Pharmacol Sci*. 2021 Jul;25(14):4818–28.
36. Mantovani A, Gray PA, Damme J Van, et al. Macrophage-derived chemokine (MDC). *J Leukoc Biol*. 2000 Sep 1;68(3):400–4.
37. Latva-Rasku A, Honka MJ, Kullberg J, et al. The SGLT2 Inhibitor Dapagliflozin Reduces Liver Fat but Does Not Affect Tissue Insulin Sensitivity: A Randomized, Double-Blind, Placebo-Controlled Study With 8-Week Treatment in Type 2 Diabetes Patients. *Diabetes Care*. 2019 May 1;42(5):931–7.
38. Xu L, Ota T. Emerging roles of SGLT2 inhibitors in obesity and insulin resistance: Focus on fat browning and macrophage polarization. 2018;
39. Feijóo-Bandín S, Aragón-Herrera A, Otero-Santiago M, et al. Role of Sodium-Glucose Co-Transporter 2 Inhibitors in the Regulation of Inflammatory Processes in Animal Models. 2022;
40. Chang SA. Smoking and type 2 diabetes mellitus. Vol. 36, *Diabetes and Metabolism Journal*. Korean Diabetes Association; 2012. p. 399–403.
41. Salazar JJ, Ennis WJ, Koh TJ. Diabetes medications: Impact on inflammation and wound healing. Vol. 30, *Journal of Diabetes and its Complications*. Elsevier Inc.; 2016. p. 746–52.
42. Yanbaeva DG, Dentener MA, Creutzberg EC, et al. Systemic effects of smoking. *Chest*. 2007 May 1;131(5):1557–66.
43. Amin K, Qadr SH, Hassan Hussein R, et al. Levels of cytokines and GADA in type I and II diabetic patients. *Prim Care Diabetes*. 2020 Feb 1;14(1):61–7.
44. Yao Y, Li R, Du J, et al. Interleukin-6 and Diabetic Retinopathy: A Systematic Review and Meta-Analysis. *Curr Eye Res*. 2019 May 4;44(5):564–74.
45. Shelbaya S, Amer H, Seddik S, et al. Study of the role of interleukin-6 and highly sensitive C-reactive protein in diabetic nephropathy in type 1 diabetic patients. Vol. 16, *European Review for Medical and Pharmacological Sciences*. *Eur Rev Med Pharmacol Sci*; 2012. p. 176–82.

- 1
- 2
- 3
- 4 46. Herder C, Bongaerts BWC, Rathmann W, et al. Association of subclinical inflammation with
- 5 polyneuropathy in the older population: KORA F4 study. *Diabetes Care*. 2013 Nov;36(11):3663–70.
- 6
- 7
- 8 47. González-Clemente JM, Vilardell C, Broch M, et al. Lower heart rate variability is associated with
- 9 higher plasma concentrations of IL-6 in type 1 diabetes. *Eur J Endocrinol*. 2007 Jul;157(1):31–8.
- 10
- 11
- 12 48. Aryan Z, Ghajar A, Faghihi-Kashani S, et al. Baseline High-Sensitivity C-Reactive Protein Predicts
- 13 Macrovascular and Microvascular Complications of Type 2 Diabetes: A Population-Based Study.
- 14 *Ann Nutr Metab*. 2018 May 1;72(4):287–95.
- 15
- 16
- 17 49. Pop-Busui R, Boulton AJM, Feldman EL, et al. Diabetic neuropathy: A position statement by the
- 18 American diabetes association. *Diabetes Care*. 2017 Jan 1;40(1):136–54.
- 19
- 20
- 21 50. Mishra M, Kumar H, Bajpai S, et al. Level of serum IL-12 and its correlation with endothelial
- 22 dysfunction, insulin resistance, proinflammatory cytokines and lipid profile in newly diagnosed type
- 23 2 diabetes. *Diabetes Res Clin Pract*. 2011 Nov;94(2):255–61.
- 24
- 25
- 26 51. Ali M, Mali V, Haddox S, et al. Essential Role of IL-12 in Angiogenesis in Type 2 Diabetes. *Am J*
- 27 *Pathol*. 2017 Nov 1;187(11):2590–601.
- 28
- 29
- 30 52. Marwaha AK, Tan S, Dutz JP. Targeting the IL-17/IFN- $\gamma$  axis as a potential new clinical therapy for
- 31 type 1 diabetes. Vol. 154, *Clinical Immunology*. Academic Press Inc.; 2014. p. 84–9.
- 32
- 33
- 34 53. Pérez-López A, Valadés D, Vázquez Martínez C, et al. Serum IL-15 and IL-15R $\alpha$  levels are
- 35 decreased in lean and obese physically active humans. *Scand J Med Sci Sport*. 2018 Mar
- 36 1;28(3):1113–20.
- 37
- 38
- 39 54. Duan Y, Li F, Wang W, et al. Interleukin-15 in obesity and metabolic dysfunction: current
- 40 understanding and future perspectives. Vol. 18, *Obesity Reviews*. Blackwell Publishing Ltd; 2017. p.
- 41 1147–58.
- 42
- 43
- 44
- 45
- 46
- 47
- 48
- 49
- 50
- 51
- 52
- 53
- 54
- 55
- 56
- 57
- 58
- 59
- 60

1  
2  
3  
4  
5  
6  
7  
8  
9  
10  
11  
12  
13  
14  
15  
16  
17  
18  
19  
20  
21  
22  
23  
24  
25  
26  
27  
28  
29  
30  
31  
32  
33  
34  
35  
36  
37  
38  
39  
40  
41  
42  
43  
44  
45  
46  
47  
48  
49  
50  
51  
52  
53  
54  
55  
56  
57  
58  
59  
60

## FIGURE LEGENDS

**Figure 1:** Volcano plot displaying pairwise comparisons of inflammatory factors in type 2 diabetes and healthy controls. Vertical dashed lines indicate threshold for two-fold differences among groups. Horizontal dashed lines indicate p-value thresholds of 0.05, 0.01, and 0.001, respectively. ● significantly different after adjustment for age and BMI, ● significantly different in the unadjusted model, ○ above significance threshold in both models. Only significant analytes are labeled.

**Figure 2:** Box plots displaying plasma concentrations of biomarkers in individuals with type 2 diabetes and 0 (n=20), 1 (n=43), 2 (n=28), or 3 or more (n=7) diabetic comorbidities (retinopathy, nephropathy, neuropathy, cardiac autonomic neuropathy). Only analytes with p-values below 0.05 are shown. \*p<0.05, \*\*p<0.01

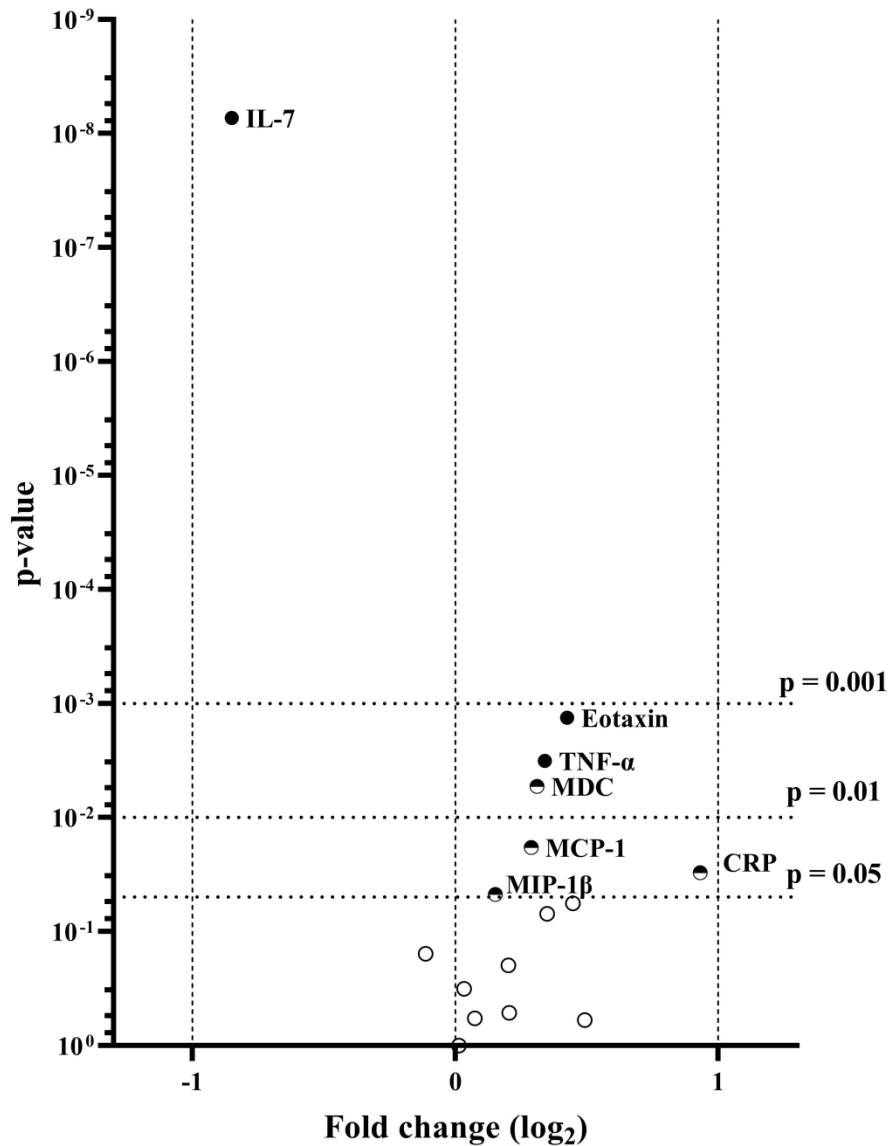

Volcano plot displaying pairwise comparisons of inflammatory factors in type 2 diabetes and healthy controls. Vertical dashed lines indicate threshold for two-fold differences among groups. Horizontal dashed lines indicate p-value thresholds of 0.05, 0.01, and 0.001, respectively. ● significantly different after adjustment for age and BMI, ○ significantly different in the unadjusted model, ○ above significance threshold in both models. Only significant analytes are labeled.

136x175mm (600 x 600 DPI)

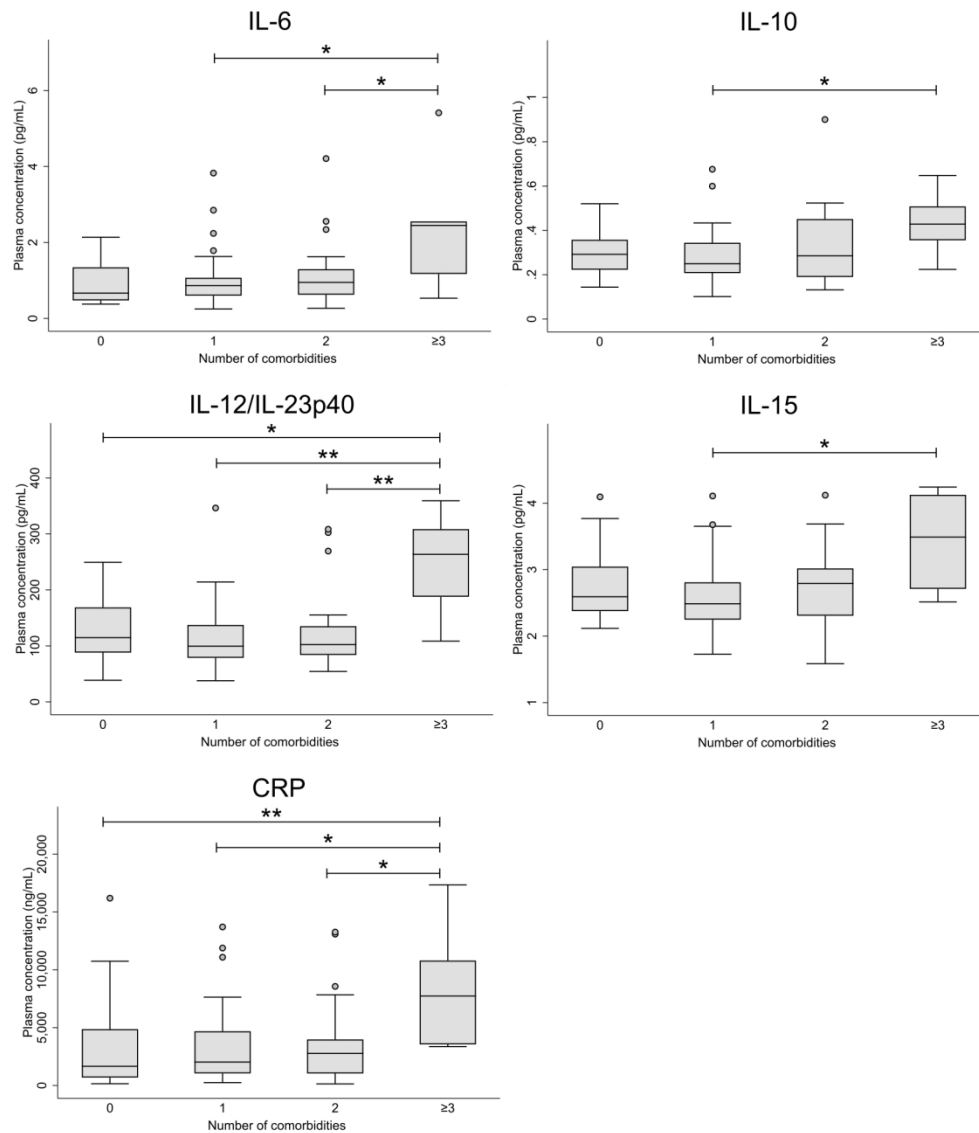

Box plots displaying plasma concentrations of biomarkers in individuals with type 2 diabetes and 0 (n=20), 1 (n=43), 2 (n=28), or 3 or more (n=7) diabetic comorbidities (retinopathy, nephropathy, neuropathy, cardiac autonomic neuropathy). Only analytes with p-values below 0.05 are shown. \*p<0.05, \*\*p<0.01

301x342mm (150 x 150 DPI)

## SUPPLEMENTARY TABLES

|                                | % of samples with estimated values†<br>(T2D/healthy) | % of excluded samples‡<br>(T2D/healthy) | Number of readings above 3 SD from group mean<br>(T2D/healthy) |
|--------------------------------|------------------------------------------------------|-----------------------------------------|----------------------------------------------------------------|
| IL-1 $\alpha$ §                | 95/95                                                | 3/5                                     | -                                                              |
| IL-1 $\beta$ §                 | 93/95                                                | 3/0                                     | -                                                              |
| IL-2§                          | 19/29                                                | 30/29                                   | -                                                              |
| IL-4§                          | 14/14                                                | 51/43                                   | -                                                              |
| IL-5§                          | 32/19                                                | 23/14                                   | -                                                              |
| <b>IL-6</b>                    | <b>0/0</b>                                           | <b>0/0</b>                              | <b>2/0</b>                                                     |
| <b>IL-7</b>                    | <b>0/0</b>                                           | <b>1/0</b>                              | <b>1/0</b>                                                     |
| <b>IL-8</b>                    | <b>0/0</b>                                           | <b>0/0</b>                              | <b>2/0</b>                                                     |
| <b>IL-10</b>                   | <b>0/0</b>                                           | <b>0/0</b>                              | <b>1/0</b>                                                     |
| <b>IL-12/IL-23p40</b>          | <b>0/0</b>                                           | <b>0/0</b>                              | <b>1/0</b>                                                     |
| IL-13§                         | 82/100                                               | 10/0                                    | -                                                              |
| <b>IL-15</b>                   | <b>0/0</b>                                           | <b>1/0</b>                              | <b>2/0</b>                                                     |
| <b>IL-16</b>                   | <b>0/0</b>                                           | <b>1/0</b>                              | <b>1/0</b>                                                     |
| IL-17A§                        | 0/0                                                  | 17/19                                   | -                                                              |
| <b>IFN-<math>\gamma</math></b> | <b>0/0</b>                                           | <b>0/0</b>                              | <b>2/0</b>                                                     |
| <b>TNF-<math>\alpha</math></b> | <b>0/0</b>                                           | <b>0/0</b>                              | <b>2/0</b>                                                     |
| TNF- $\beta$ §                 | 21/5                                                 | 33/19                                   | -                                                              |
| <b>Eotaxin</b>                 | <b>0/0</b>                                           | <b>1/0</b>                              | <b>0/0</b>                                                     |
| Eotaxin-3§                     | 0/0                                                  | 15/10                                   | -                                                              |
| <b>IP-10</b>                   | <b>0/0</b>                                           | <b>1/0</b>                              | <b>3/0</b>                                                     |
| <b>MCP-1</b>                   | <b>0/0</b>                                           | <b>1/0</b>                              | <b>0/0</b>                                                     |
| MCP-4§                         | 0/0                                                  | 1/10                                    | -                                                              |
| <b>MDC</b>                     | <b>0/0</b>                                           | <b>1/0</b>                              | <b>1/0</b>                                                     |
| MIP-1 $\alpha$ §               | 0/0                                                  | 10/5                                    | -                                                              |
| <b>MIP-1<math>\beta</math></b> | <b>0/0</b>                                           | <b>1/5</b>                              | <b>2/0</b>                                                     |
| <b>TARC</b>                    | <b>0/0</b>                                           | <b>1/0</b>                              | <b>2/0</b>                                                     |
| <b>CRP</b>                     | <b>0/0</b>                                           | <b>0/0</b>                              | <b>3/1</b>                                                     |

**Supplementary table 1:** Overview of MSD multiplex analysis and data handling. † calculated as the lower detection limit divided by the square root of two, ‡ excluded due to a coefficient of variance above 30%

between duplicates, § excluded from further analysis due to insufficient data quality. Boldface font indicates analytes included in the analysis.

|                       | Healthy<br>(n=21)    | Type 2 diabetes<br>(n=98) | p-value          |
|-----------------------|----------------------|---------------------------|------------------|
| <b>IL-6</b>           | 0.6 (0.4-0.9)        | 0.9 (0.6-1.3)             | 0.056            |
| <b>IL-7</b>           | 15.5 ± 5.0           | 8.2 (5.9-10.2)            | <b>&lt;0.001</b> |
| <b>IL-8</b>           | 12.1 ± 3.8           | 12.4 (8.8-16.7)           | 0.514            |
| <b>IL-10</b>          | 0.2 (0.2-0.3)        | 0.3 (0.2-0.4)             | 0.198            |
| <b>IL-12/IL-23p40</b> | 100.9 ± 45.5         | 107.5 (82.9-145.8)        | 0.070            |
| <b>IL-15</b>          | 2.7 ± 0.4            | 2.6 (2.3-3.0)             | 0.999            |
| <b>IL-16</b>          | 225.0 ± 53.9         | 208.0 ± 48.4              | 0.156            |
| <b>IFN-γ</b>          | 5.1 ± 2.4            | 5.2 (3.1-7.7)             | 0.594            |
| <b>TNF-α</b>          | 1.2 ± 0.2            | 1.5 (1.3-1.8)             | <b>0.003</b>     |
| <b>Eotaxin</b>        | 267.6 ± 74.3         | 339.9 (259.8-434.1)       | <b>0.001</b>     |
| <b>IP-10</b>          | 539.4 (397.7-767.9)  | 575.9 (443.6-725.4)       | 0.576            |
| <b>MCP-1</b>          | 243.3 (215.9-287.8)  | 323.1 ± 105.0             | <b>0.018</b>     |
| <b>MDC</b>            | 912.3 ± 255.5        | 1059.7 (887.9-1279.2)     | <b>0.005</b>     |
| <b>MIP-1β</b>         | 131.5 (102.0-167.8)  | 161.9 ± 48.3              | <b>0.047</b>     |
| <b>TARC</b>           | 218.6 (120.7-531.7)  | 275.4 (168.6-412.4)       | 0.316            |
| <b>CRP (ng/mL)</b>    | 871.3 (528.6-3353.3) | 2769.3 (1037.6-5236.5)    | <b>0.030</b>     |

**Supplementary table 2:** Plasma concentrations of inflammatory factors. Results (in pg/mL, unless otherwise stated) displayed as either mean ± SD or median (1<sup>st</sup>-3<sup>rd</sup> quartiles) based on distribution of the data. Boldface font indicates statistical significance (p<0.05).

STROBE Statement—Checklist of items that should be included in reports of *cross-sectional studies*

|                              | Item No | Recommendation                                                                                                                                                                                    | Page No            |
|------------------------------|---------|---------------------------------------------------------------------------------------------------------------------------------------------------------------------------------------------------|--------------------|
| <b>Title and abstract</b>    | 1       | (a) Indicate the study's design with a commonly used term in the title or the abstract                                                                                                            | 1, 2               |
|                              |         | (b) Provide in the abstract an informative and balanced summary of what was done and what was found                                                                                               | 2                  |
| <b>Introduction</b>          |         |                                                                                                                                                                                                   |                    |
| Background/rationale         | 2       | Explain the scientific background and rationale for the investigation being reported                                                                                                              | 3                  |
| Objectives                   | 3       | State specific objectives, including any prespecified hypotheses                                                                                                                                  | 4                  |
| <b>Methods</b>               |         |                                                                                                                                                                                                   |                    |
| Study design                 | 4       | Present key elements of study design early in the paper                                                                                                                                           | 4                  |
| Setting                      | 5       | Describe the setting, locations, and relevant dates, including periods of recruitment, exposure, follow-up, and data collection                                                                   | 4                  |
| Participants                 | 6       | (a) Give the eligibility criteria, and the sources and methods of selection of participants                                                                                                       | 4                  |
| Variables                    | 7       | Clearly define all outcomes, exposures, predictors, potential confounders, and effect modifiers. Give diagnostic criteria, if applicable                                                          | 4-5                |
| Data sources/<br>measurement | 8*      | For each variable of interest, give sources of data and details of methods of assessment (measurement). Describe comparability of assessment methods if there is more than one group              | 4-5                |
| Bias                         | 9       | Describe any efforts to address potential sources of bias                                                                                                                                         | 4-5                |
| Study size                   | 10      | Explain how the study size was arrived at                                                                                                                                                         | Secondary analysis |
| Quantitative variables       | 11      | Explain how quantitative variables were handled in the analyses. If applicable, describe which groupings were chosen and why                                                                      | 5                  |
| Statistical methods          | 12      | (a) Describe all statistical methods, including those used to control for confounding                                                                                                             | 5-6                |
|                              |         | (b) Describe any methods used to examine subgroups and interactions                                                                                                                               | 5                  |
|                              |         | (c) Explain how missing data were addressed                                                                                                                                                       | 5                  |
|                              |         | (d) If applicable, describe analytical methods taking account of sampling strategy                                                                                                                | n/a                |
|                              |         | (e) Describe any sensitivity analyses                                                                                                                                                             | n/a                |
| <b>Results</b>               |         |                                                                                                                                                                                                   |                    |
| Participants                 | 13*     | (a) Report numbers of individuals at each stage of study—eg numbers potentially eligible, examined for eligibility, confirmed eligible, included in the study, completing follow-up, and analysed | Secondary analysis |
|                              |         | (b) Give reasons for non-participation at each stage                                                                                                                                              | n/a                |
|                              |         | (c) Consider use of a flow diagram                                                                                                                                                                | n/a                |
| Descriptive data             | 14*     | (a) Give characteristics of study participants (eg demographic, clinical, social) and information on exposures and potential confounders                                                          | Table 1            |
|                              |         | (b) Indicate number of participants with missing data for each variable of interest                                                                                                               | Supp. material     |



1  
2  
3  
4  
5  
6  
7  
8  
9  
10  
11  
12  
13  
14  
15  
16  
17  
18  
19  
20  
21  
22  
23  
24  
25  
26  
27  
28  
29  
30  
31  
32  
33  
34  
35  
36  
37  
38  
39  
40  
41  
42  
43  
44  
45  
46  
47  
48  
49  
50  
51  
52  
53  
54  
55  
56  
57  
58  
59  
60

|                          |     |                                                                                                                                                                                                              |                  |
|--------------------------|-----|--------------------------------------------------------------------------------------------------------------------------------------------------------------------------------------------------------------|------------------|
| Outcome data             | 15* | Report numbers of outcome events or summary measures                                                                                                                                                         |                  |
| Main results             | 16  | (a) Give unadjusted estimates and, if applicable, confounder-adjusted estimates and their precision (eg, 95% confidence interval). Make clear which confounders were adjusted for and why they were included | Table 2, Table 3 |
|                          |     | (b) Report category boundaries when continuous variables were categorized                                                                                                                                    | n/a              |
|                          |     | (c) If relevant, consider translating estimates of relative risk into absolute risk for a meaningful time period                                                                                             | n/a              |
| Other analyses           | 17  | Report other analyses done—eg analyses of subgroups and interactions, and sensitivity analyses                                                                                                               | n/a              |
| <b>Discussion</b>        |     |                                                                                                                                                                                                              |                  |
| Key results              | 18  | Summarise key results with reference to study objectives                                                                                                                                                     | 12               |
| Limitations              | 19  | Discuss limitations of the study, taking into account sources of potential bias or imprecision. Discuss both direction and magnitude of any potential bias                                                   | 15-16            |
| Interpretation           | 20  | Give a cautious overall interpretation of results considering objectives, limitations, multiplicity of analyses, results from similar studies, and other relevant evidence                                   | 12-15            |
| Generalisability         | 21  | Discuss the generalisability (external validity) of the study results                                                                                                                                        | 14-15            |
| <b>Other information</b> |     |                                                                                                                                                                                                              |                  |
| Funding                  | 22  | Give the source of funding and the role of the funders for the present study and, if applicable, for the original study on which the present article is based                                                | 15               |

\*Give information separately for exposed and unexposed groups.

**Note:** An Explanation and Elaboration article discusses each checklist item and gives methodological background and published examples of transparent reporting. The STROBE checklist is best used in conjunction with this article (freely available on the Web sites of PLoS Medicine at <http://www.plosmedicine.org/>, Annals of Internal Medicine at <http://www.annals.org/>, and Epidemiology at <http://www.epidem.com/>). Information on the STROBE Initiative is available at [www.strobe-statement.org](http://www.strobe-statement.org).
