# Supplementary material for: Low-grade inflammation in type 2 diabetes: a cross-sectional study from a Danish diabetes outpatient clinic
Source: PubMed Central journal article supplement — BMJ Open. 2022 Dec 14;12(12):e062188. doi: 10.1136/bmjopen-2022-062188 (PMC9756179; doi:10.1136/bmjopen-2022-062188), 2022-12-14
Supplement: bmjopen-2022-062188supp001.pdf [file bmjopen-2022-062188supp001.pdf]

## SUPPLEMENTARY TABLES

|                                | % of samples with estimated values <sup>†</sup><br>(T2D/healthy) | % of excluded samples <sup>‡</sup><br>(T2D/healthy) | Number of readings above 3 SD from group mean<br>(T2D/healthy) |
|--------------------------------|------------------------------------------------------------------|-----------------------------------------------------|----------------------------------------------------------------|
| IL-1 $\alpha$ §                | 95/95                                                            | 3/5                                                 | -                                                              |
| IL-1 $\beta$ §                 | 93/95                                                            | 3/0                                                 | -                                                              |
| IL-2§                          | 19/29                                                            | 30/29                                               | -                                                              |
| IL-4§                          | 14/14                                                            | 51/43                                               | -                                                              |
| IL-5§                          | 32/19                                                            | 23/14                                               | -                                                              |
| <b>IL-6</b>                    | <b>0/0</b>                                                       | <b>0/0</b>                                          | <b>2/0</b>                                                     |
| <b>IL-7</b>                    | <b>0/0</b>                                                       | <b>1/0</b>                                          | <b>1/0</b>                                                     |
| <b>IL-8</b>                    | <b>0/0</b>                                                       | <b>0/0</b>                                          | <b>2/0</b>                                                     |
| <b>IL-10</b>                   | <b>0/0</b>                                                       | <b>0/0</b>                                          | <b>1/0</b>                                                     |
| <b>IL-12/IL-23p40</b>          | <b>0/0</b>                                                       | <b>0/0</b>                                          | <b>1/0</b>                                                     |
| IL-13§                         | 82/100                                                           | 10/0                                                | -                                                              |
| <b>IL-15</b>                   | <b>0/0</b>                                                       | <b>1/0</b>                                          | <b>2/0</b>                                                     |
| <b>IL-16</b>                   | <b>0/0</b>                                                       | <b>1/0</b>                                          | <b>1/0</b>                                                     |
| IL-17A§                        | 0/0                                                              | 17/19                                               | -                                                              |
| <b>IFN-<math>\gamma</math></b> | <b>0/0</b>                                                       | <b>0/0</b>                                          | <b>2/0</b>                                                     |
| <b>TNF-<math>\alpha</math></b> | <b>0/0</b>                                                       | <b>0/0</b>                                          | <b>2/0</b>                                                     |
| TNF- $\beta$ §                 | 21/5                                                             | 33/19                                               | -                                                              |
| <b>Eotaxin</b>                 | <b>0/0</b>                                                       | <b>1/0</b>                                          | <b>0/0</b>                                                     |
| Eotaxin-3§                     | 0/0                                                              | 15/10                                               | -                                                              |
| <b>IP-10</b>                   | <b>0/0</b>                                                       | <b>1/0</b>                                          | <b>3/0</b>                                                     |
| <b>MCP-1</b>                   | <b>0/0</b>                                                       | <b>1/0</b>                                          | <b>0/0</b>                                                     |
| MCP-4§                         | 0/0                                                              | 1/10                                                | -                                                              |
| <b>MDC</b>                     | <b>0/0</b>                                                       | <b>1/0</b>                                          | <b>1/0</b>                                                     |
| MIP-1 $\alpha$ §               | 0/0                                                              | 10/5                                                | -                                                              |
| <b>MIP-1<math>\beta</math></b> | <b>0/0</b>                                                       | <b>1/5</b>                                          | <b>2/0</b>                                                     |
| <b>TARC</b>                    | <b>0/0</b>                                                       | <b>1/0</b>                                          | <b>2/0</b>                                                     |
| <b>CRP</b>                     | <b>0/0</b>                                                       | <b>0/0</b>                                          | <b>3/1</b>                                                     |

**Supplementary table 1:** Overview of MSD multiplex analysis and data handling. <sup>†</sup> calculated as the lower detection limit divided by the square root of two, <sup>‡</sup> excluded due to a coefficient of variance above 30%

between duplicates, § excluded from further analysis due to insufficient data quality. Boldface font indicates analytes included in the analysis.

|                       | <b>Healthy</b><br>(n=21) | <b>Type 2 diabetes</b><br>(n=98) | <b>p-value</b>   |
|-----------------------|--------------------------|----------------------------------|------------------|
| <b>IL-6</b>           | 0.6 (0.4-0.9)            | 0.9 (0.6-1.3)                    | 0.056            |
| <b>IL-7</b>           | 15.5 ± 5.0               | 8.2 (5.9-10.2)                   | <b>&lt;0.001</b> |
| <b>IL-8</b>           | 12.1 ± 3.8               | 12.4 (8.8-16.7)                  | 0.514            |
| <b>IL-10</b>          | 0.2 (0.2-0.3)            | 0.3 (0.2-0.4)                    | 0.198            |
| <b>IL-12/IL-23p40</b> | 100.9 ± 45.5             | 107.5 (82.9-145.8)               | 0.070            |
| <b>IL-15</b>          | 2.7 ± 0.4                | 2.6 (2.3-3.0)                    | 0.999            |
| <b>IL-16</b>          | 225.0 ± 53.9             | 208.0 ± 48.4                     | 0.156            |
| <b>IFN-γ</b>          | 5.1 ± 2.4                | 5.2 (3.1-7.7)                    | 0.594            |
| <b>TNF-α</b>          | 1.2 ± 0.2                | 1.5 (1.3-1.8)                    | <b>0.003</b>     |
| <b>Eotaxin</b>        | 267.6 ± 74.3             | 339.9 (259.8-434.1)              | <b>0.001</b>     |
| <b>IP-10</b>          | 539.4 (397.7-767.9)      | 575.9 (443.6-725.4)              | 0.576            |
| <b>MCP-1</b>          | 243.3 (215.9-287.8)      | 323.1 ± 105.0                    | <b>0.018</b>     |
| <b>MDC</b>            | 912.3 ± 255.5            | 1059.7 (887.9-1279.2)            | <b>0.005</b>     |
| <b>MIP-1β</b>         | 131.5 (102.0-167.8)      | 161.9 ± 48.3                     | <b>0.047</b>     |
| <b>TARC</b>           | 218.6 (120.7-531.7)      | 275.4 (168.6-412.4)              | 0.316            |
| <b>CRP (ng/mL)</b>    | 871.3 (528.6-3353.3)     | 2769.3 (1037.6-5236.5)           | <b>0.030</b>     |

**Supplementary table 2:** Plasma concentrations of inflammatory factors. Results (in pg/mL, unless otherwise stated) displayed as either mean ± SD or median (1<sup>st</sup>-3<sup>rd</sup> quartiles) based on distribution of the data. Boldface font indicates statistical significance (p<0.05).
